# Supplementary material for: Molecular-iodine catalyzed selective construction of cyclopenta[b]indoles from indoles and acetone: a green gateway to indole-fused cycles
Source: Royal Society of Chemistry journal article supplement (doi:10.1039/d3ob01561k), 2023-01-01
Supplement: d3ob01561k1.pdf [file d3ob01561k1.pdf]

## Supporting information

### **Molecular-iodine catalyzed selective construction of cyclopenta[*b*]indoles from indoles and acetone: a green gateway to indole-fused cycles**

Prantika Bhattacharjee,<sup>a,b</sup> Bipul Sarma<sup>a</sup> and Utpal Bora<sup>\*a</sup>

<sup>a</sup>Department of Chemical Sciences, Tezpur University, Napaam-784028, Assam, India

<sup>b</sup>Department of Chemistry, Bahona College, Jorhat-785101, Assam, India

\*Corresponding author email: [utbora@yahoo.co.in](mailto:utbora@yahoo.co.in), [ubora@tezu.ernet.in](mailto:ubora@tezu.ernet.in)

### **Contents**

|   |                                                                 |     |
|---|-----------------------------------------------------------------|-----|
| 1 | <sup>1</sup> H and <sup>13</sup> C NMR spectra of all compounds | S2  |
| 2 | HRMS spectra                                                    | S48 |
| 3 | Single crystal XRD data                                         | S50 |
| 4 | References                                                      | S51 |

# 1. Copies of $^1\text{H}$ and $^{13}\text{C}$ NMR spectra

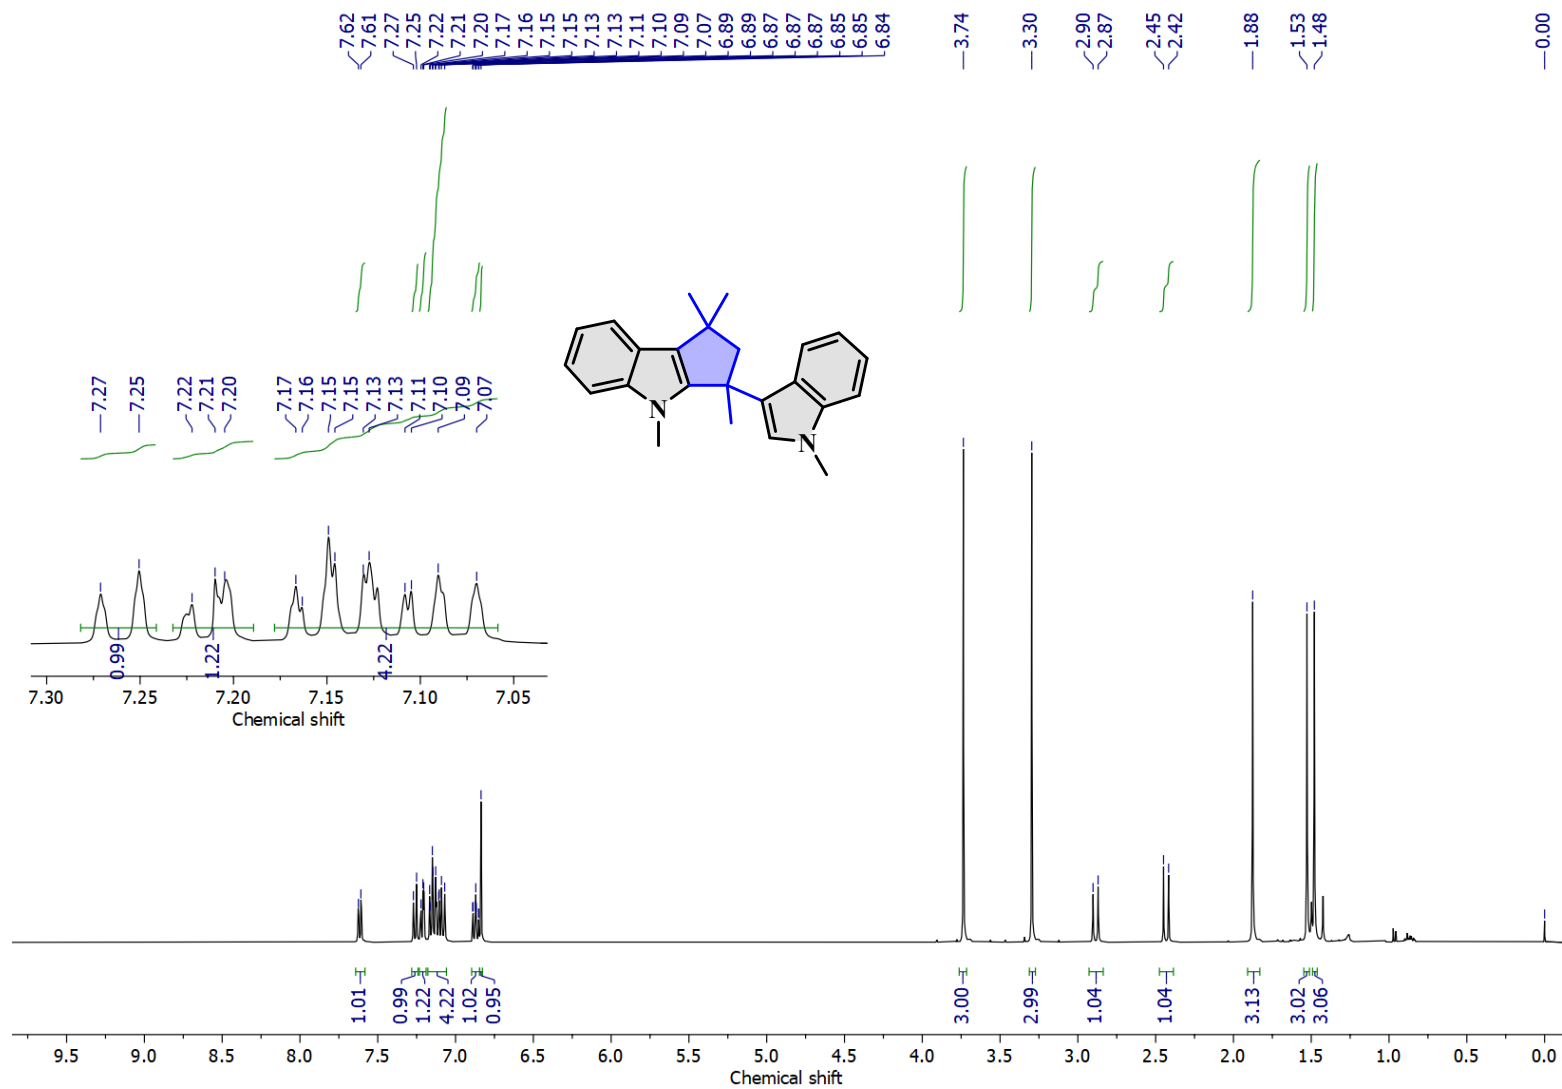

Fig. S1 400 MHz  $^1\text{H}$  NMR spectrum of (2a)<sup>1</sup> in  $\text{CDCl}_3$

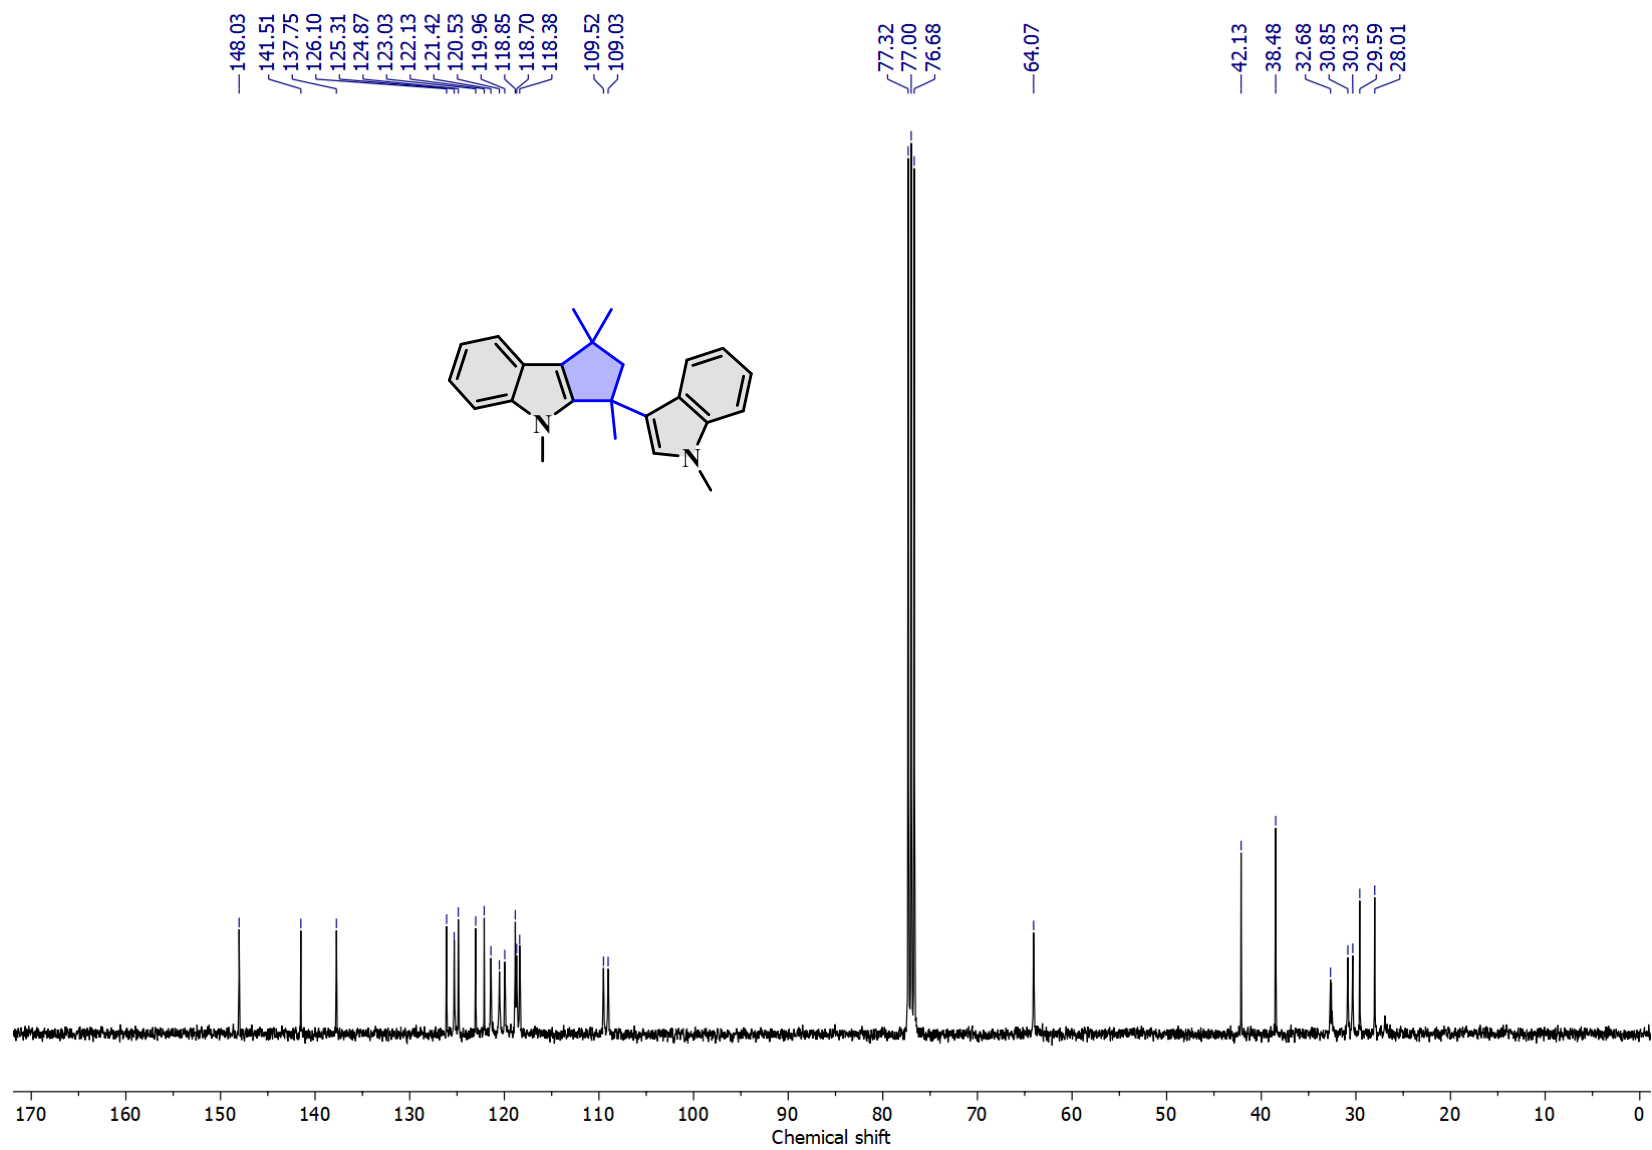

Fig. S2 100 MHz <sup>13</sup>C NMR spectrum of (2a)<sup>1</sup> in CDCl<sub>3</sub>

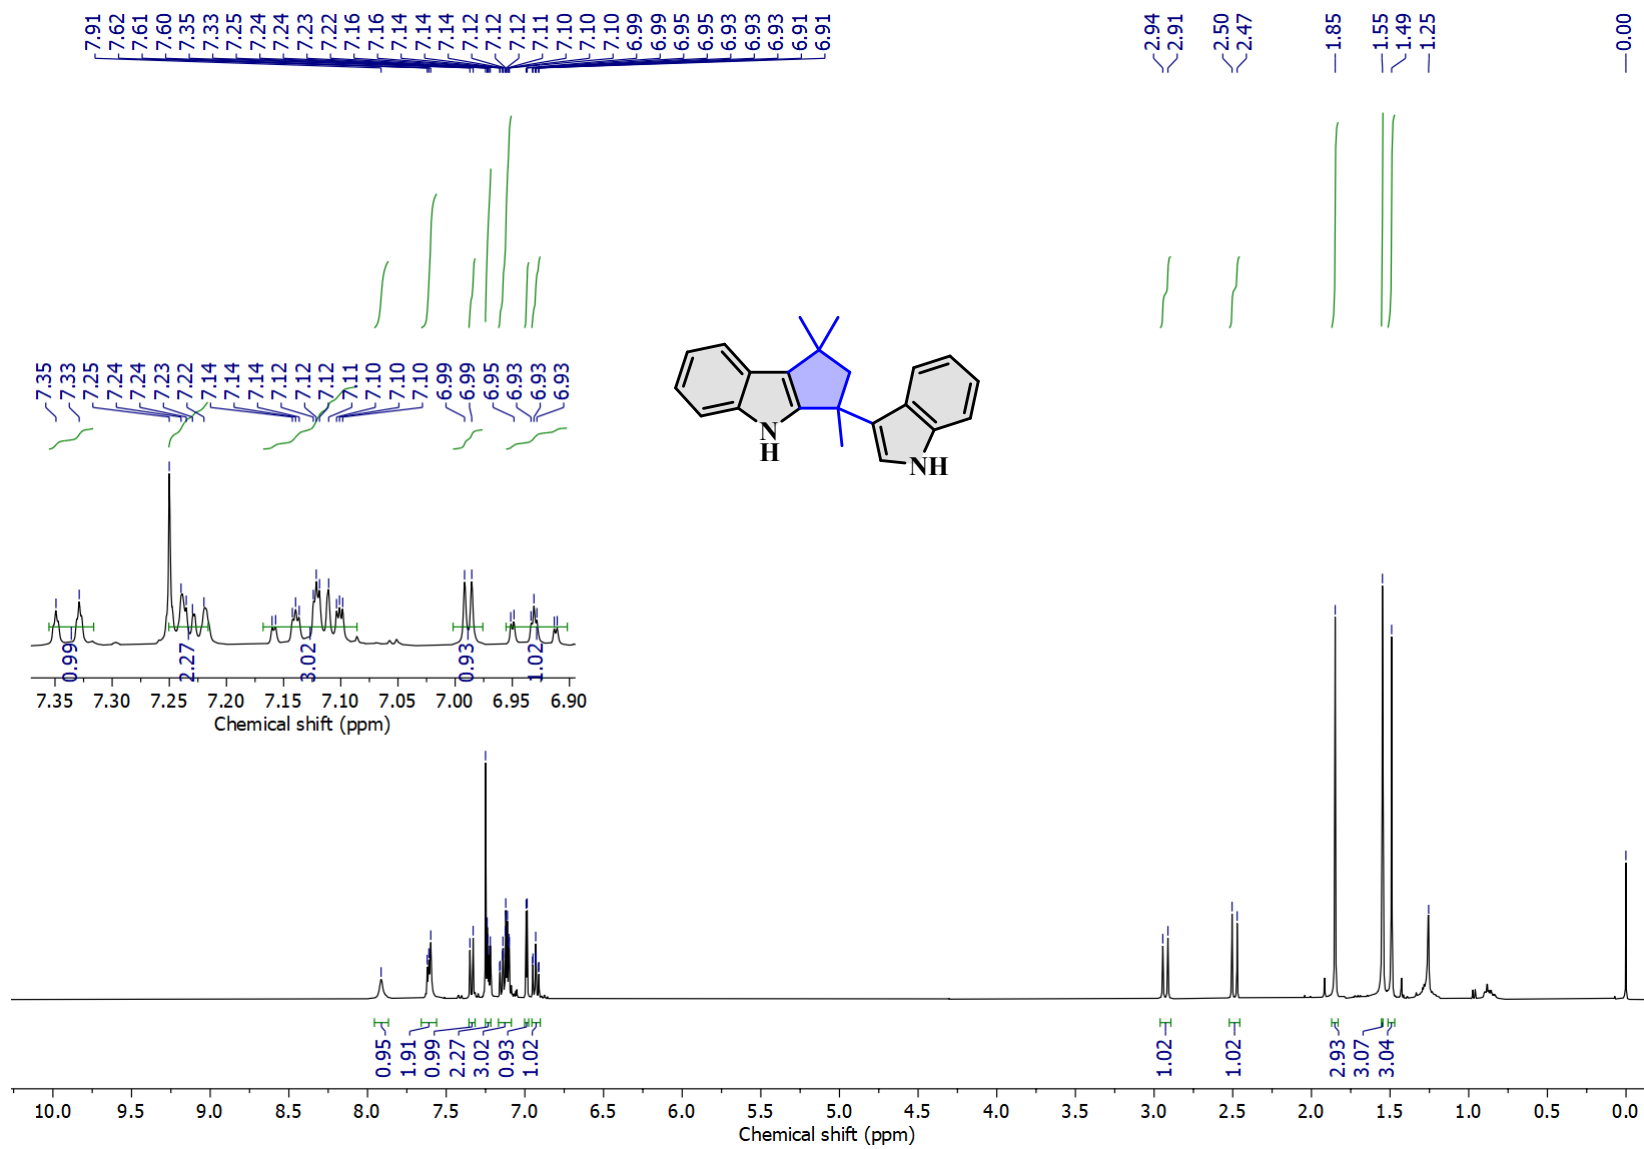

Fig. S3 400 MHz <sup>1</sup>H NMR spectrum of (2b)<sup>1</sup> in CDCl<sub>3</sub>

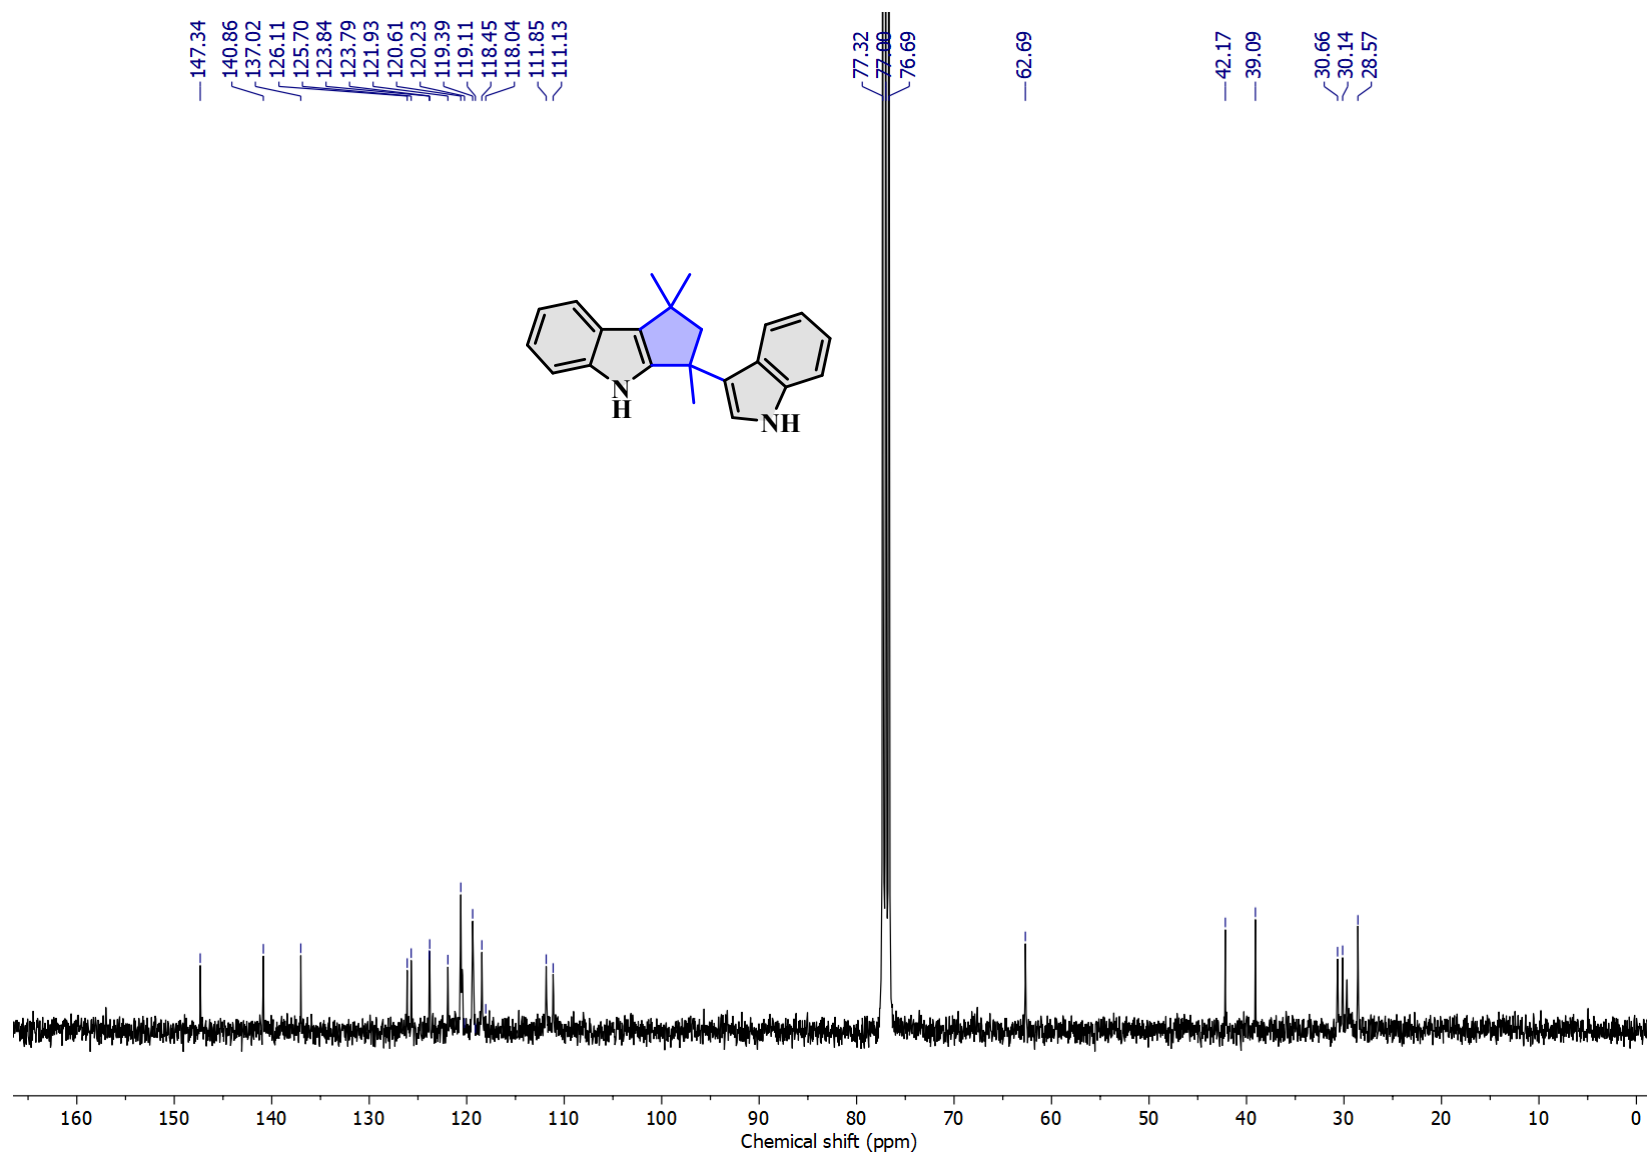

Fig. S4 100 MHz  $^{13}\text{C}$  NMR spectrum of **(2b)**<sup>1</sup> in  $\text{CDCl}_3$

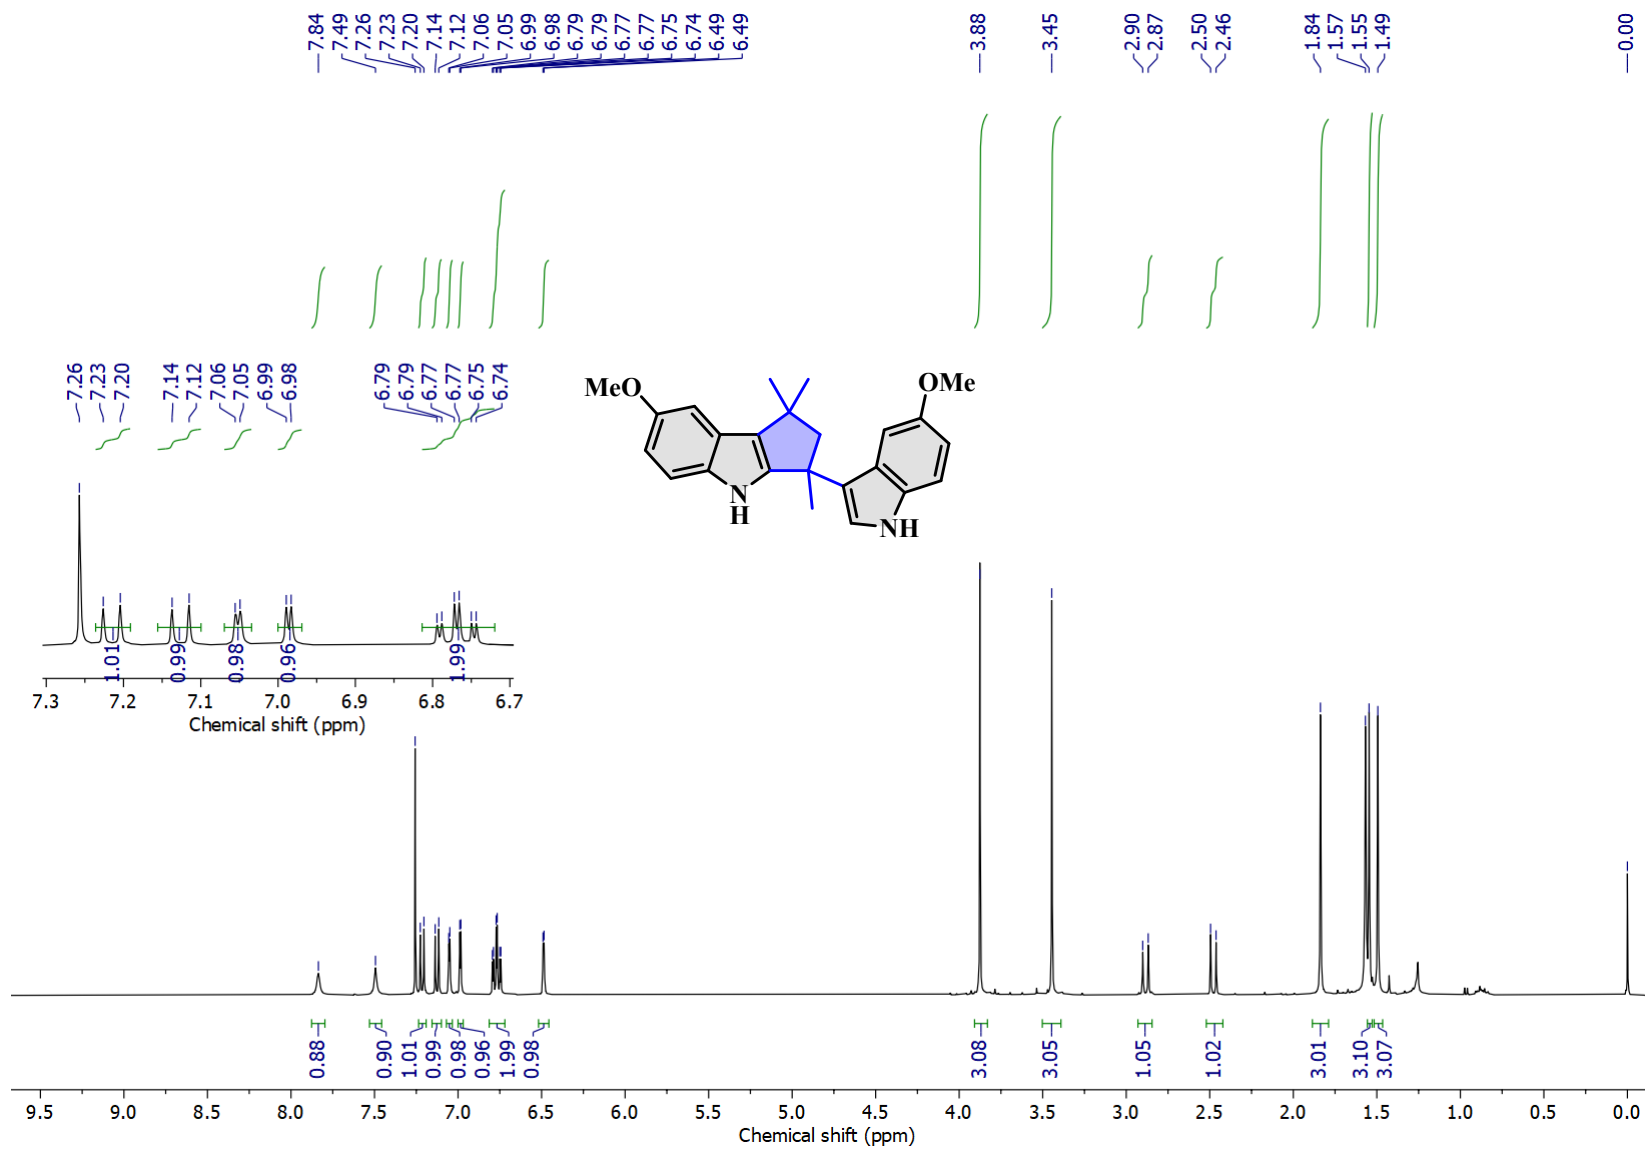

Fig. S5 400 MHz <sup>1</sup>H NMR spectrum of **(2c)<sup>2</sup>** in CDCl<sub>3</sub>

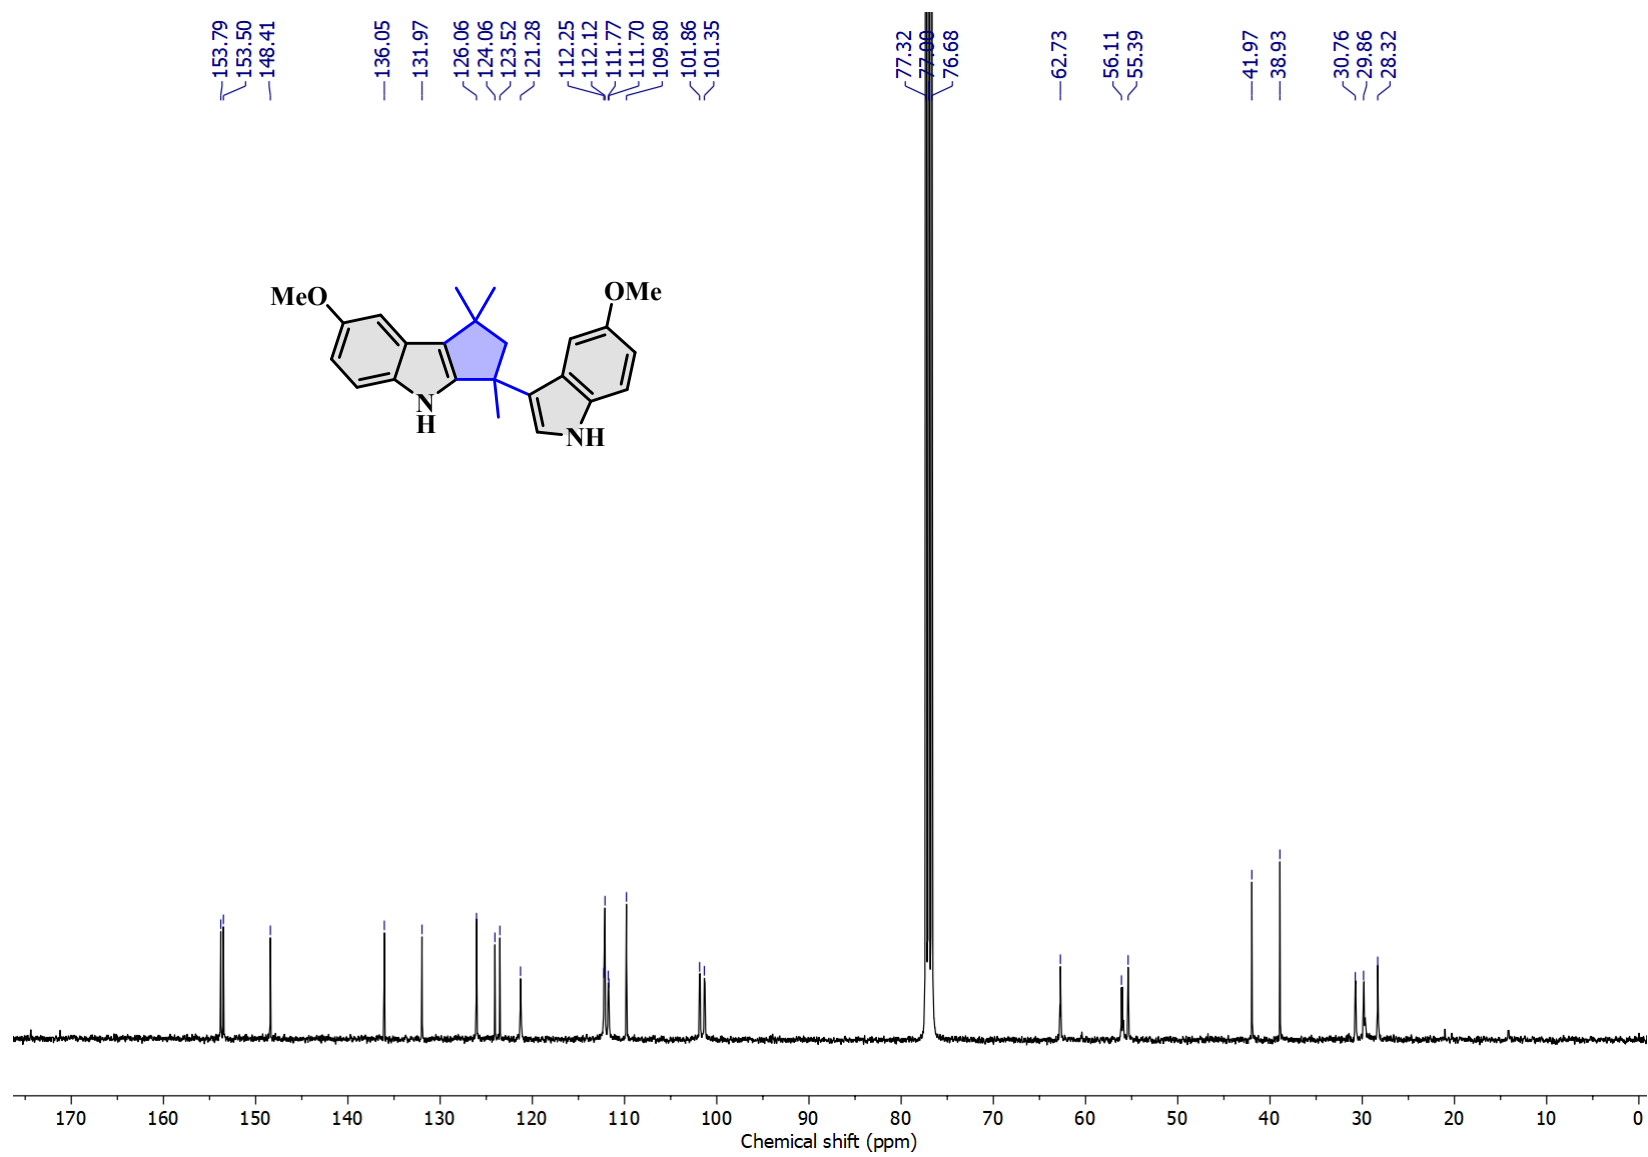

Fig. S6 100 MHz <sup>13</sup>C NMR spectrum of **(2c)<sup>2</sup>** in CDCl<sub>3</sub>





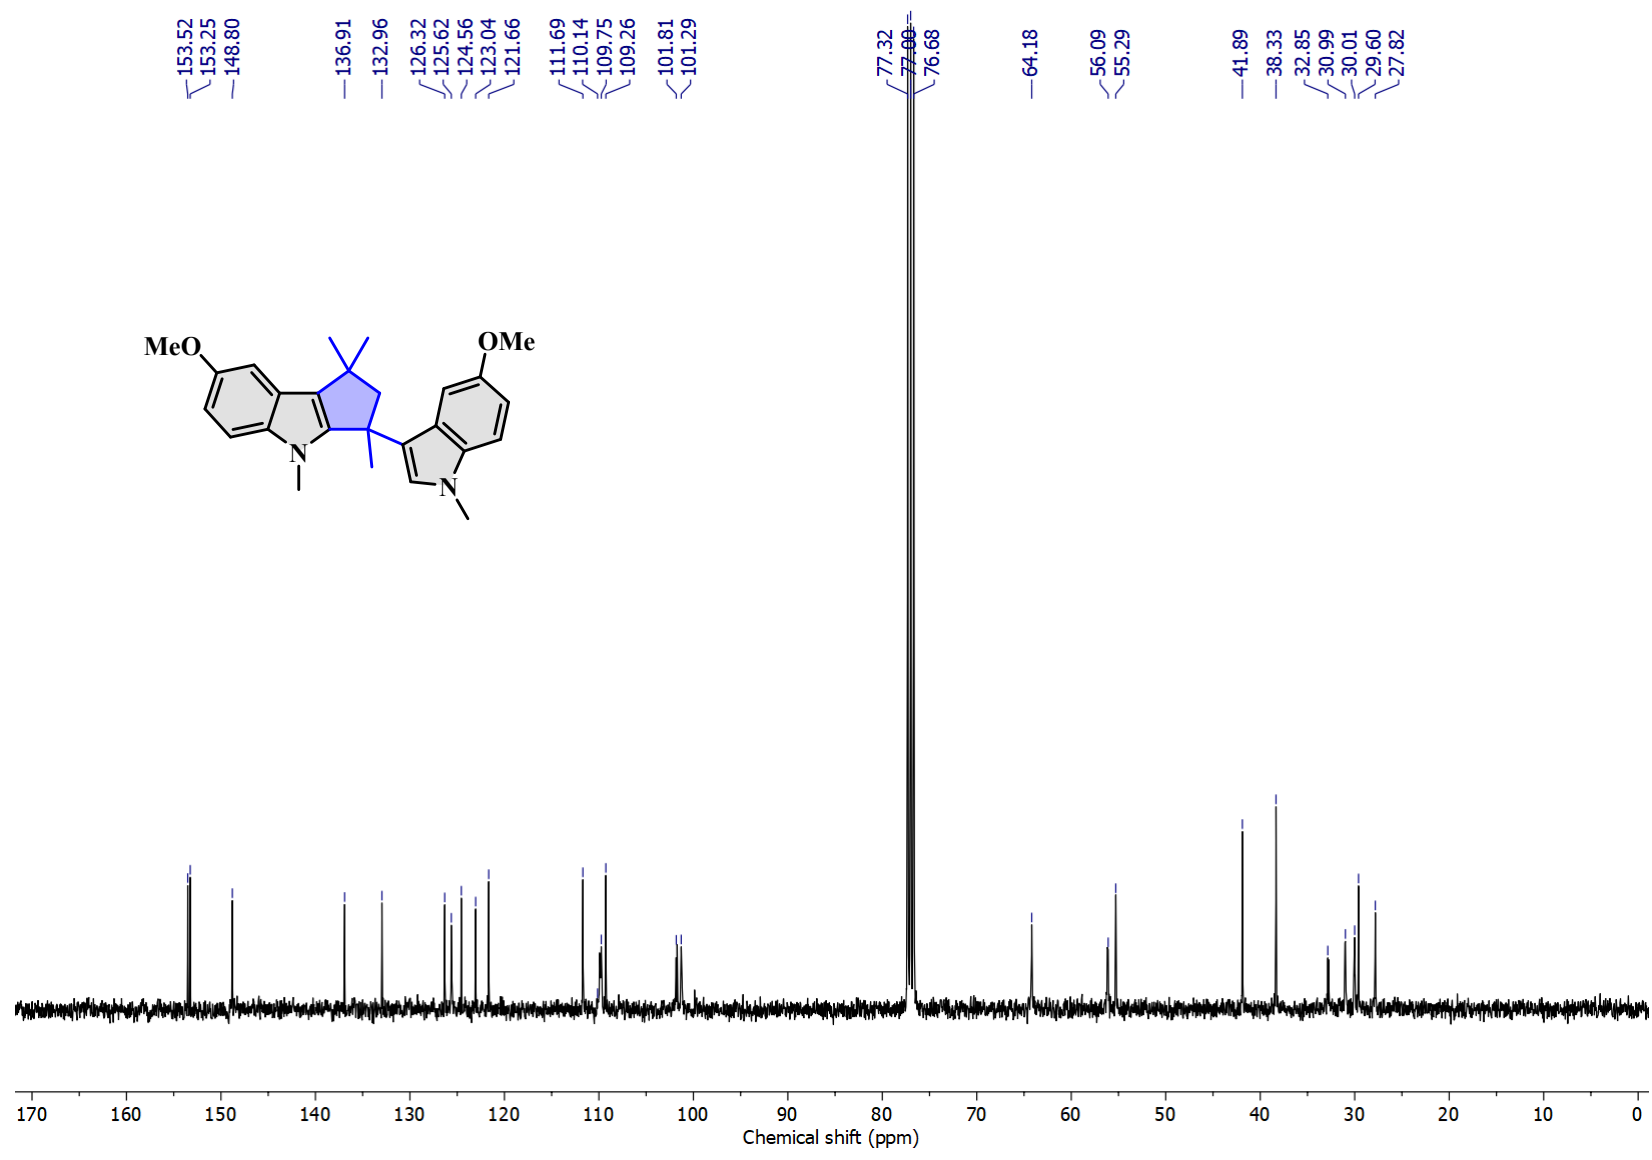

Fig. S8 100 MHz <sup>13</sup>C NMR spectrum of (2d)<sup>2</sup> in CDCl<sub>3</sub>

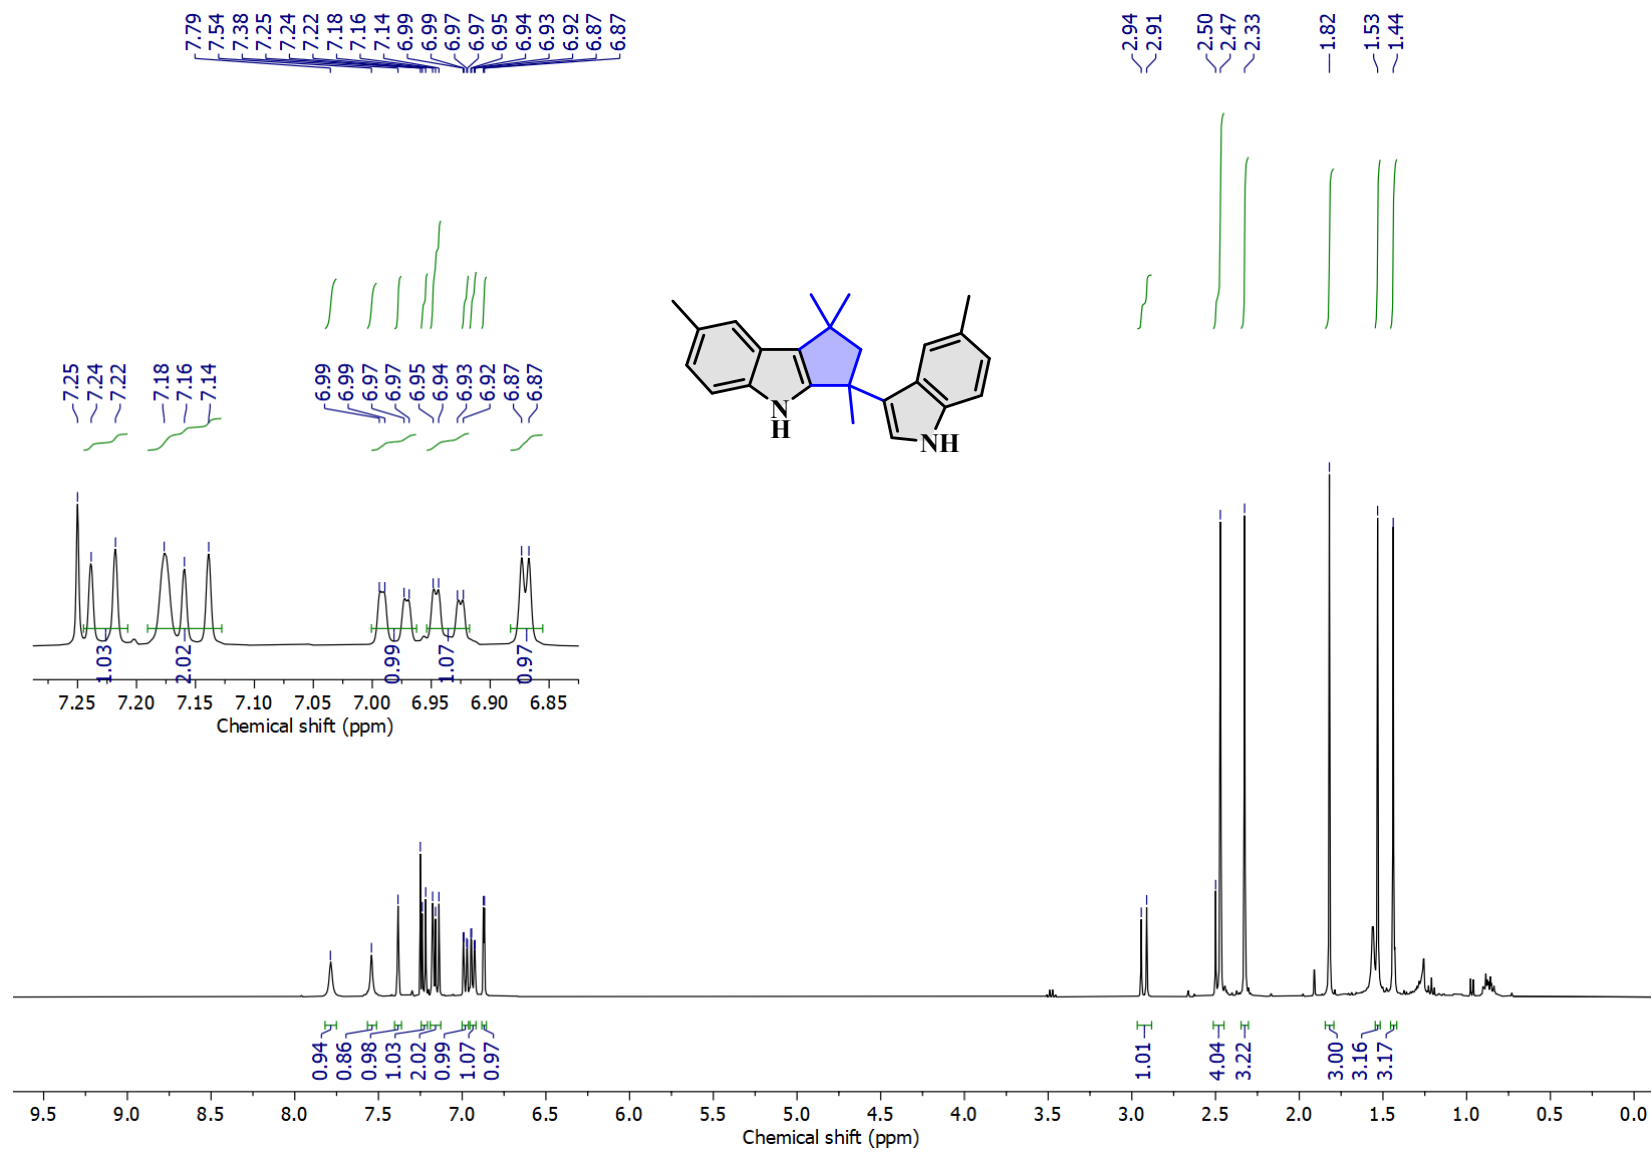

**Fig. S9** 400 MHz <sup>1</sup>H NMR spectrum of **2e** in CDCl<sub>3</sub>

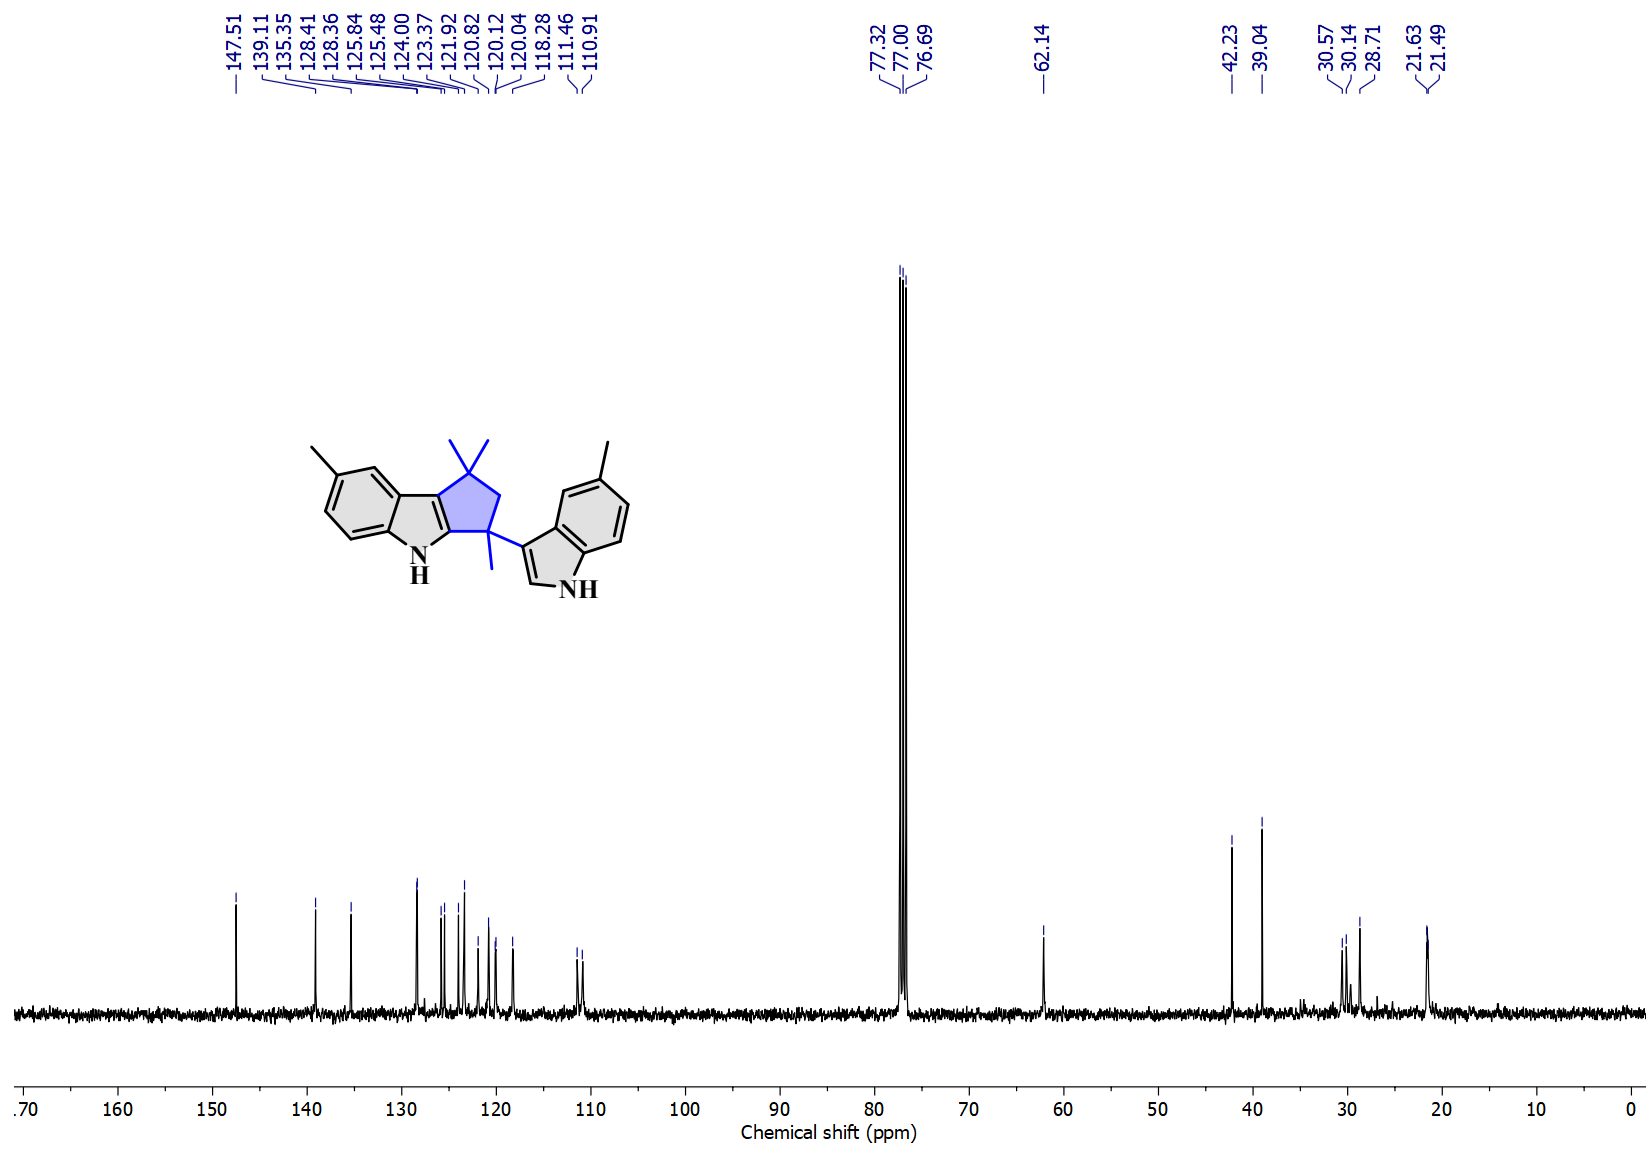

Fig. S10 100 MHz  $^{13}\text{C}$  NMR spectrum of **2e** in  $\text{CDCl}_3$

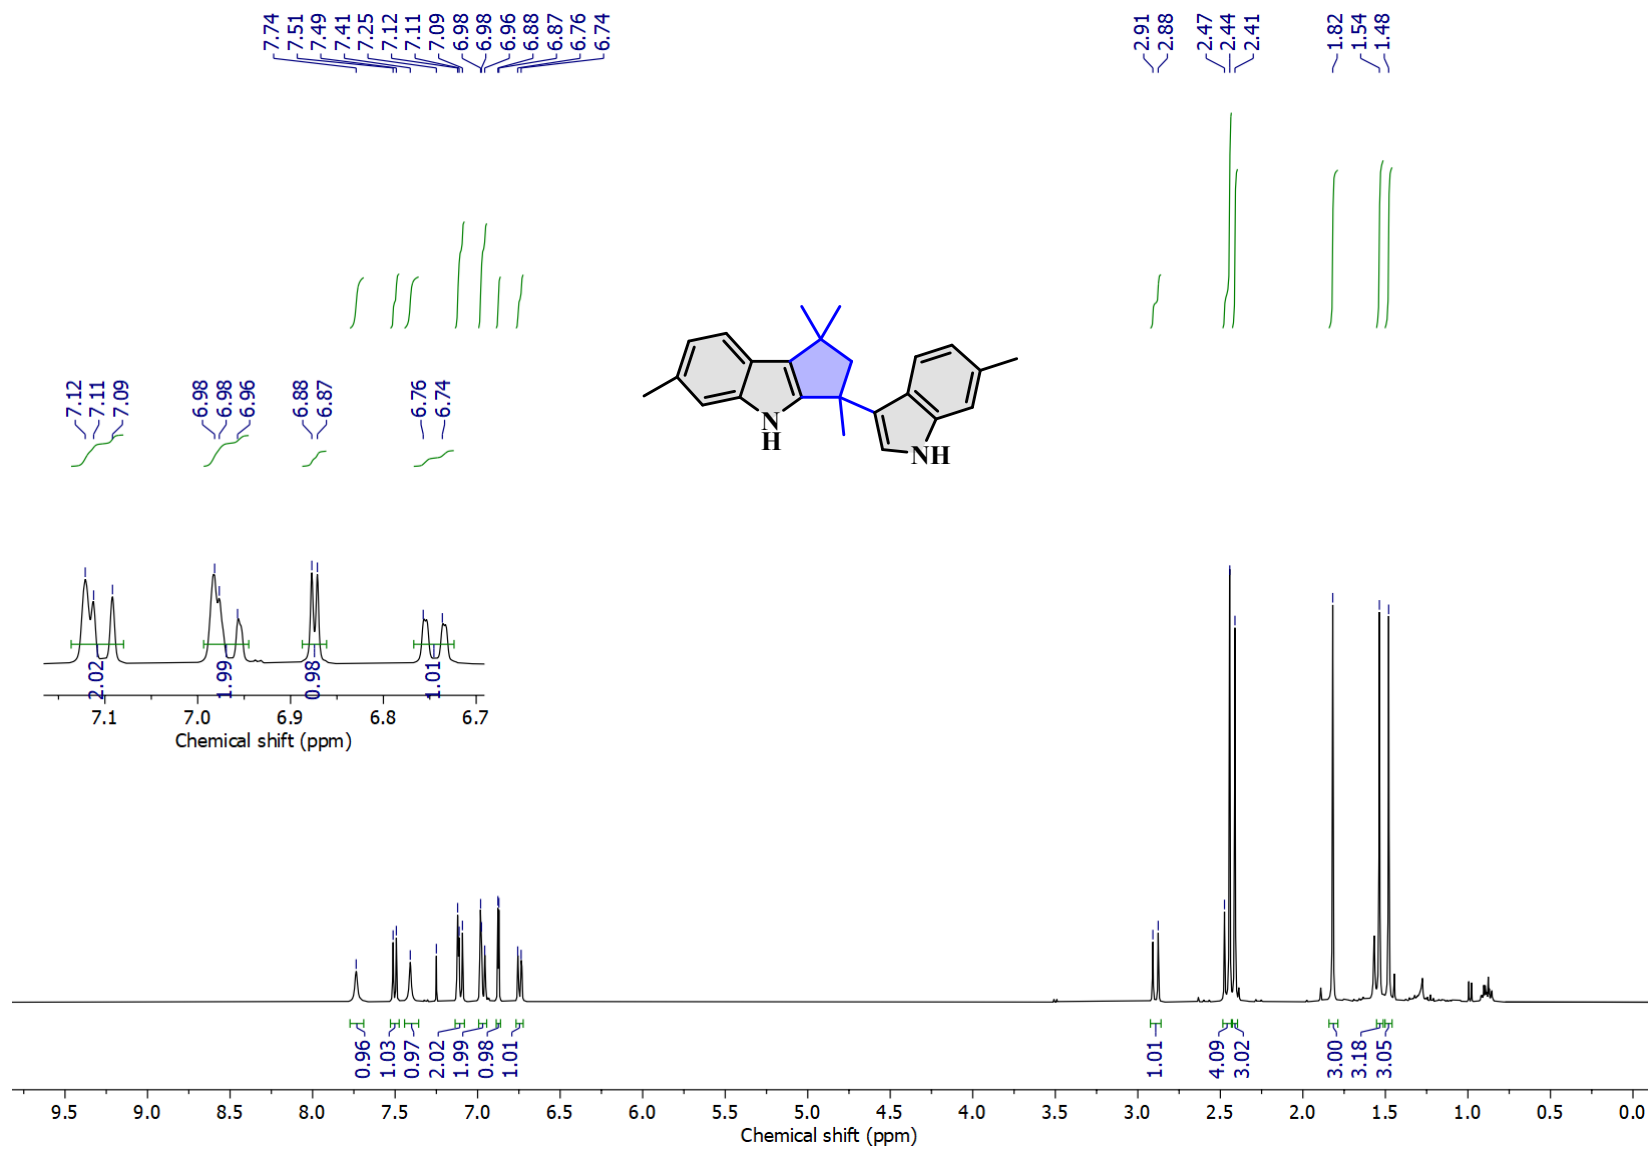

Fig. S11 400 MHz <sup>1</sup>H NMR spectrum of **2f** in CDCl<sub>3</sub>

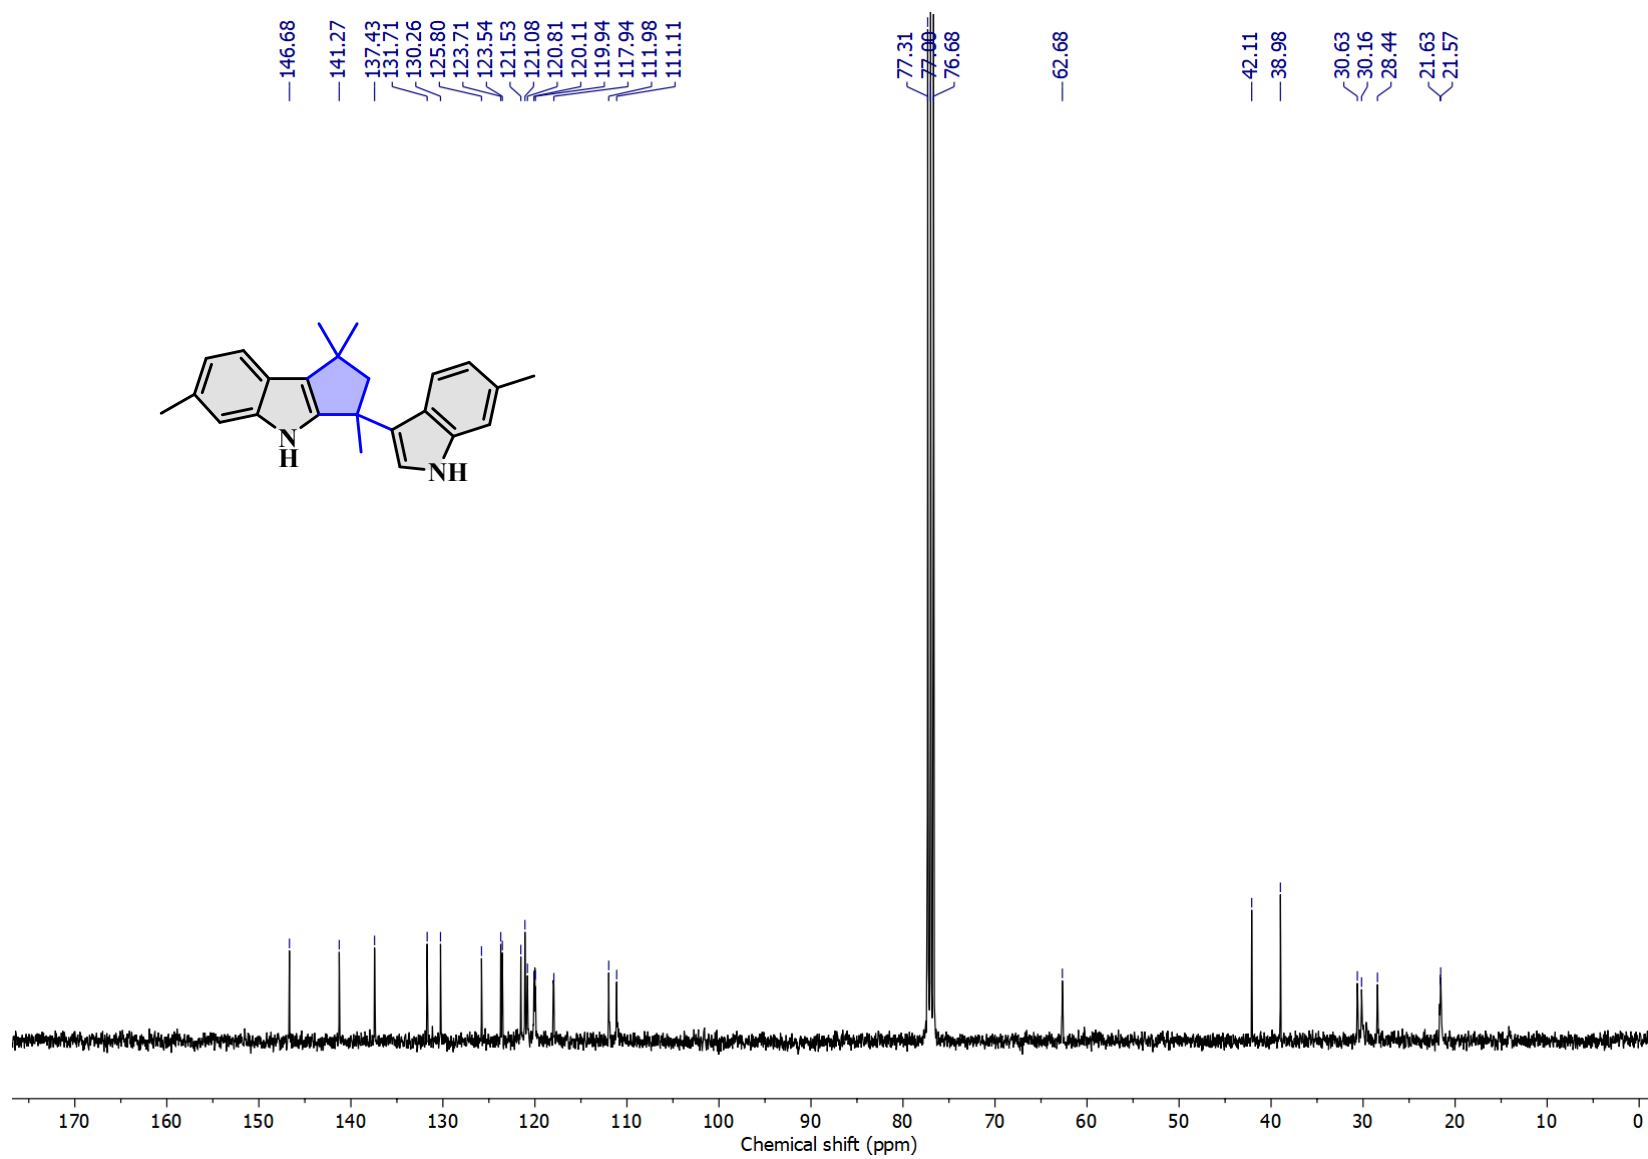

**Fig. S12** 100 MHz  $^{13}\text{C}$  NMR spectrum of **2f** in  $\text{CDCl}_3$

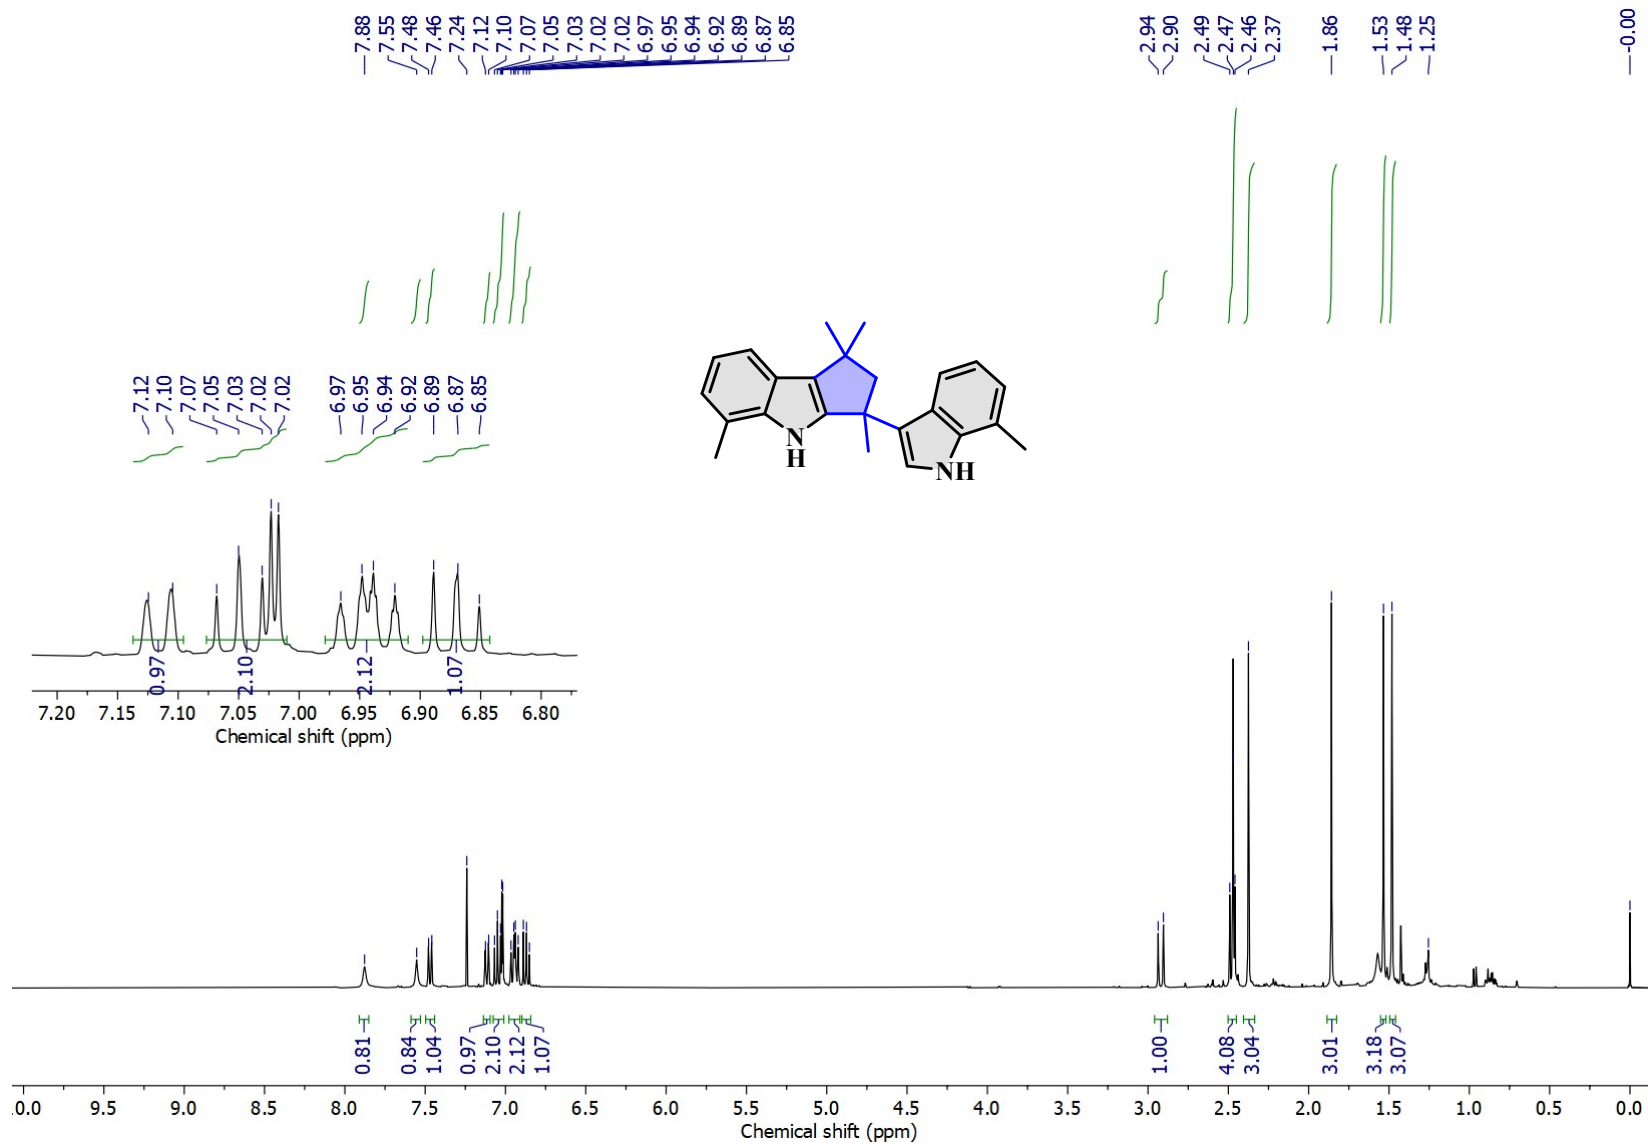

Fig. S13 400 MHz <sup>1</sup>H NMR spectrum of (2g)<sup>1</sup> in CDCl<sub>3</sub>

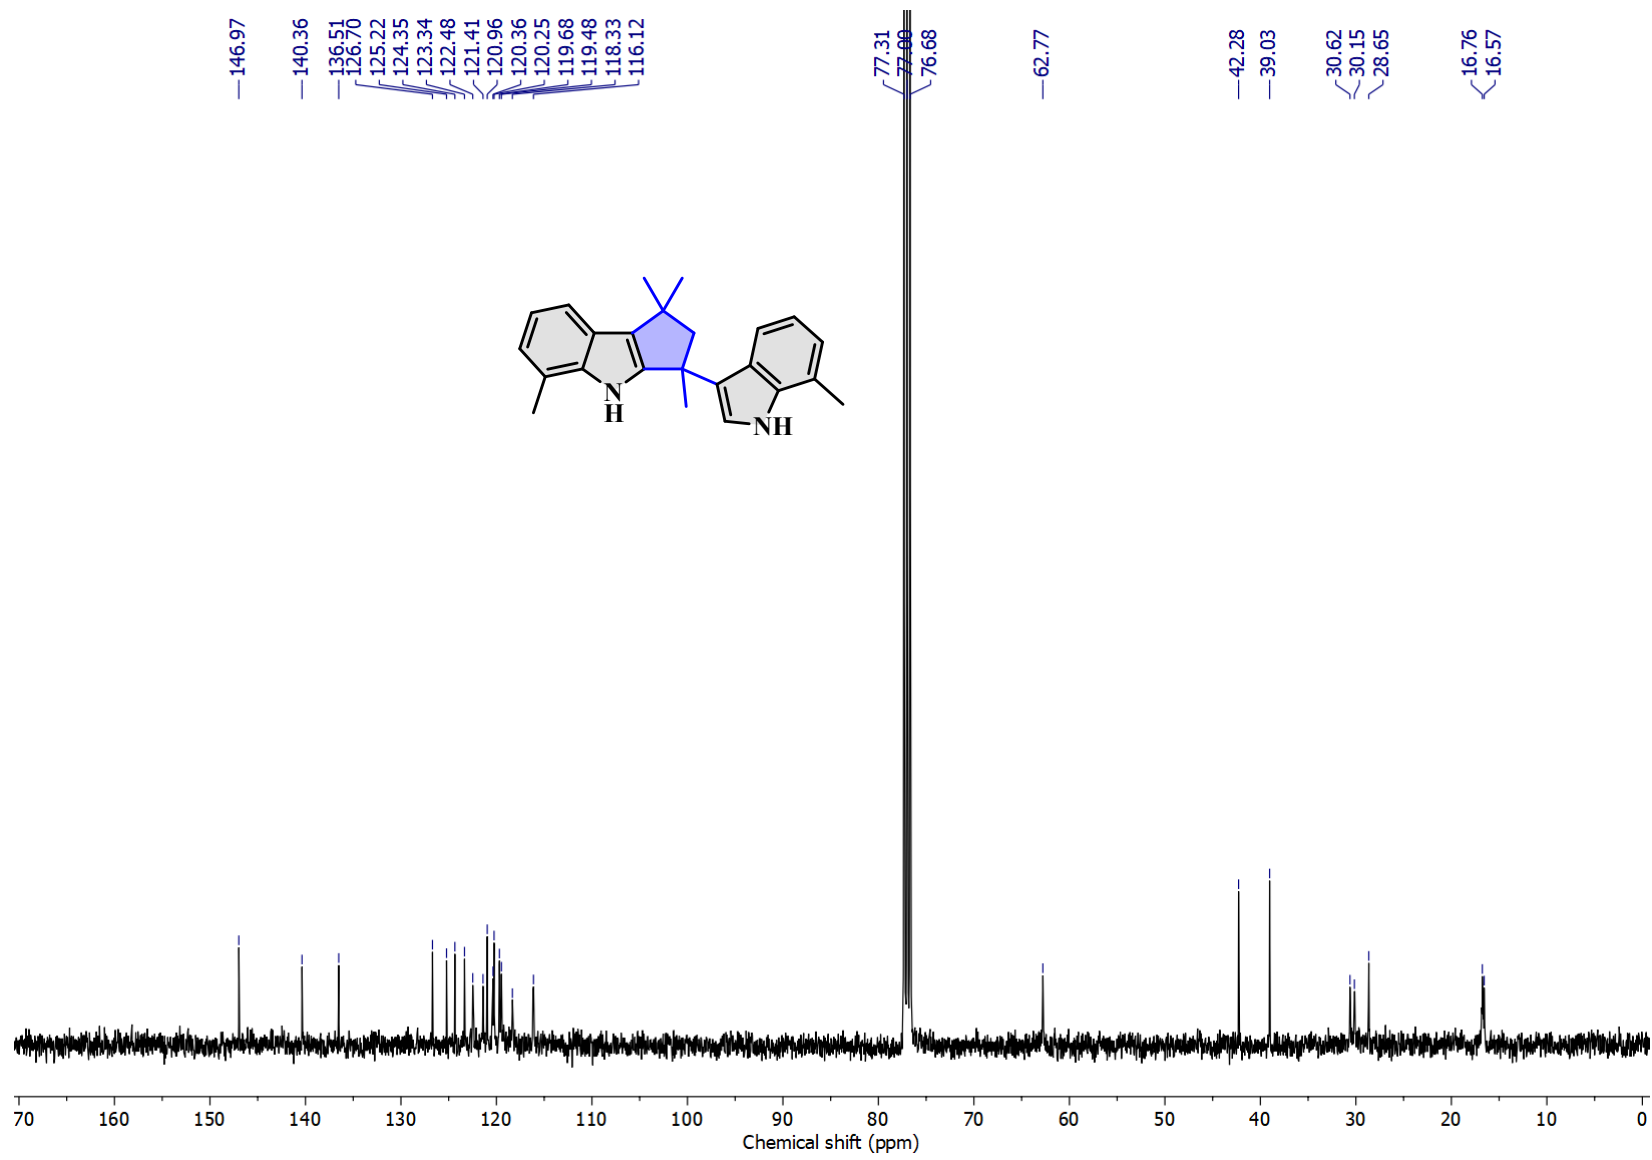

Fig. S14 100 MHz <sup>13</sup>C NMR spectrum of (2g)<sup>1</sup> in CDCl<sub>3</sub>

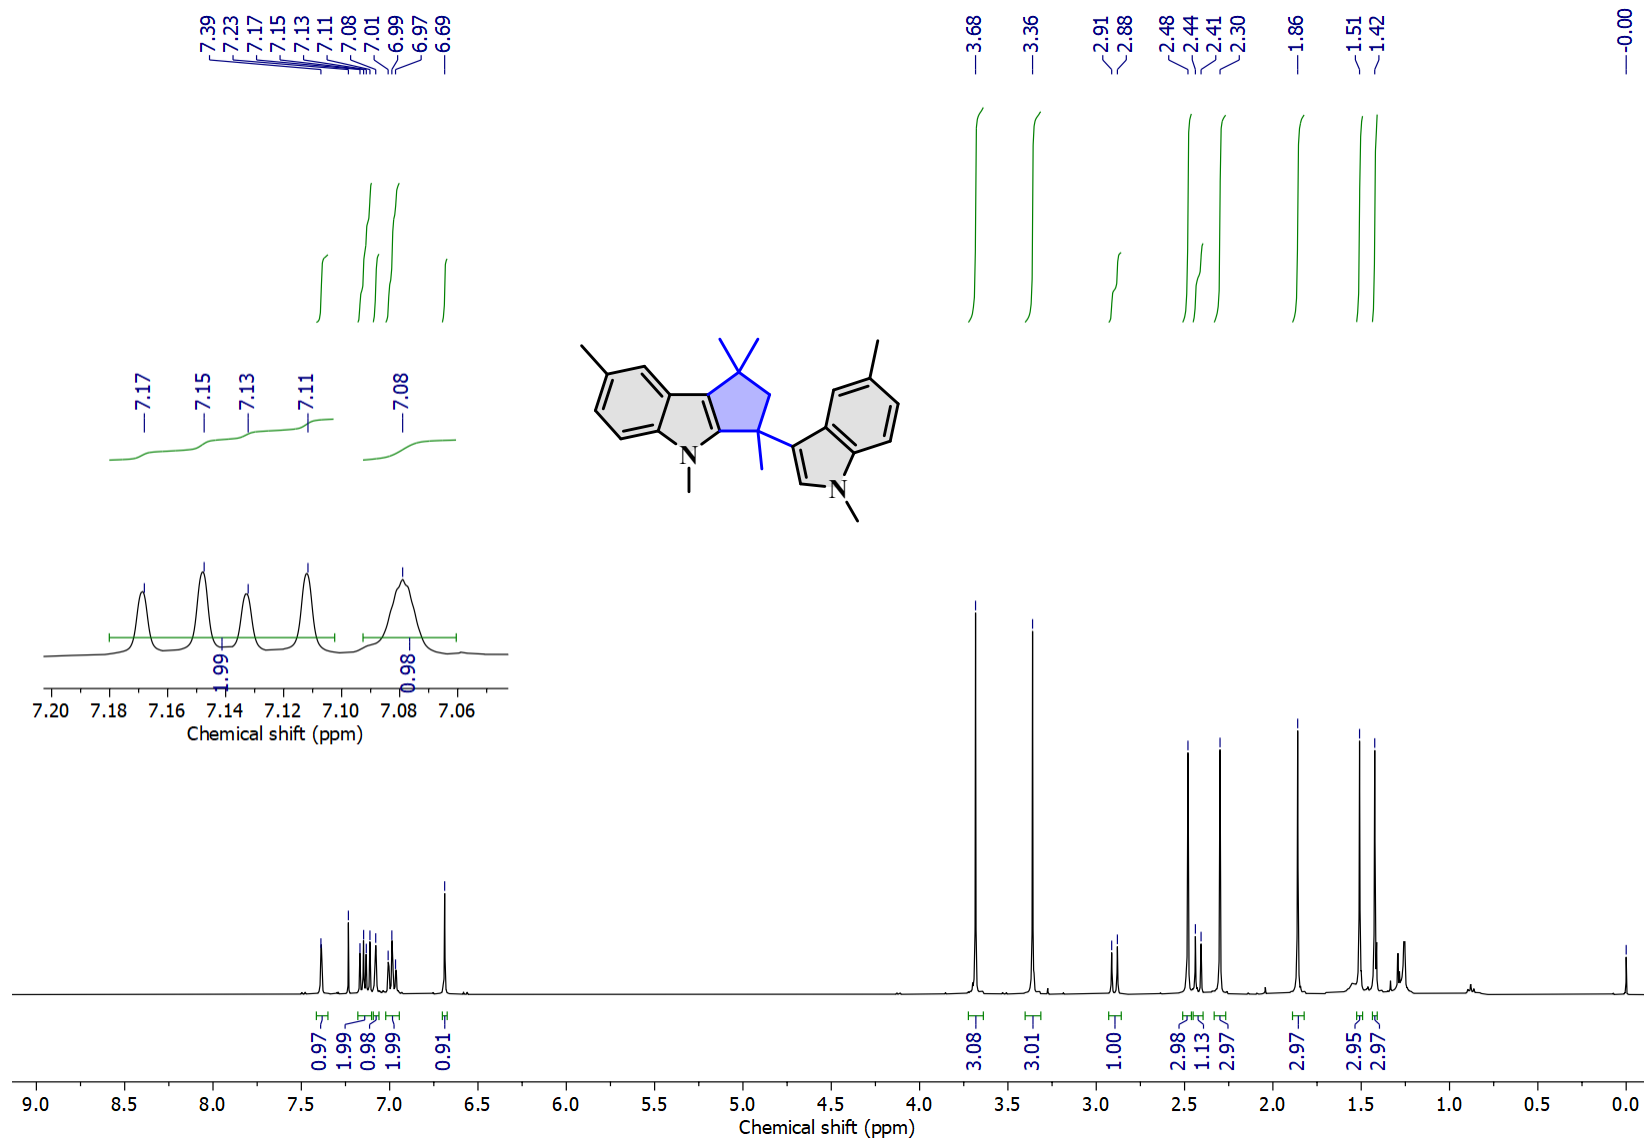

**Fig. S15** 400 MHz <sup>1</sup>H NMR spectrum of **(2h)<sup>2</sup>** in CDCl<sub>3</sub>



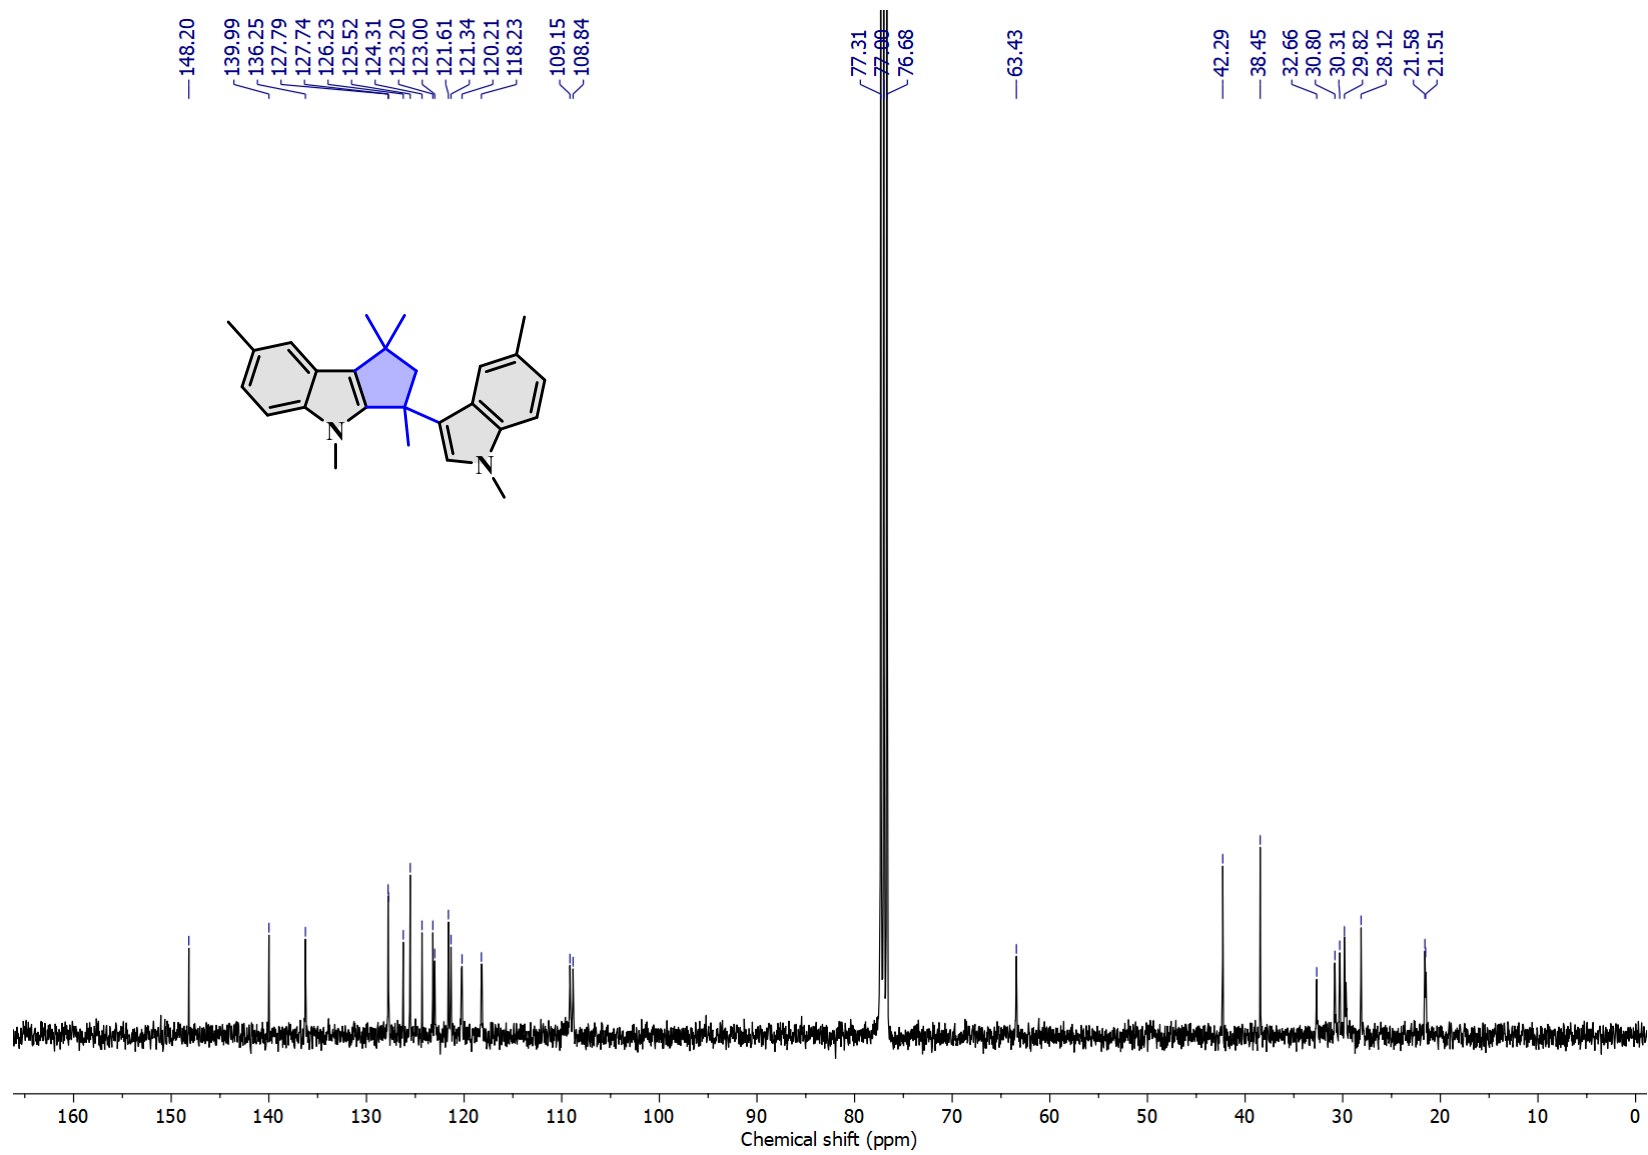

Fig. S16 100 MHz  $^{13}\text{C}$  NMR spectrum of  $(2h)_2$  in  $\text{CDCl}_3$

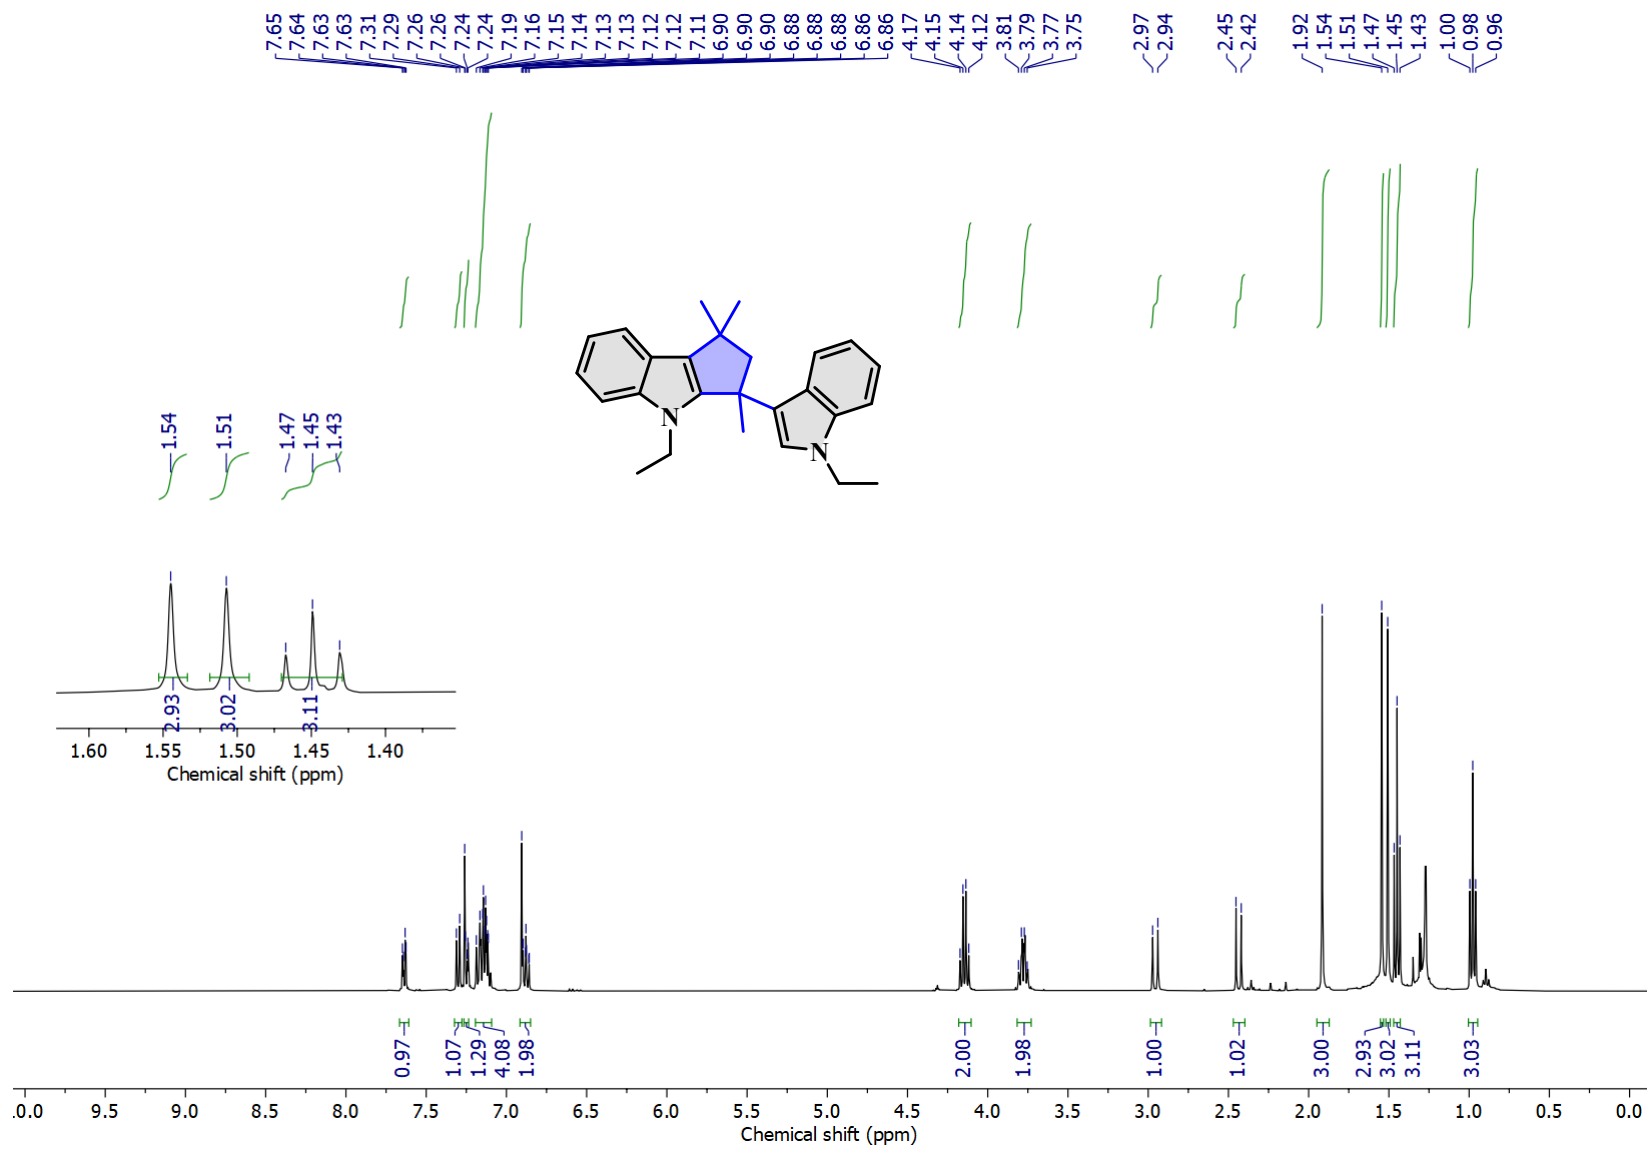

**Fig. S17** 400 MHz  $^1\text{H}$  NMR spectrum of **2i** in  $\text{CDCl}_3$

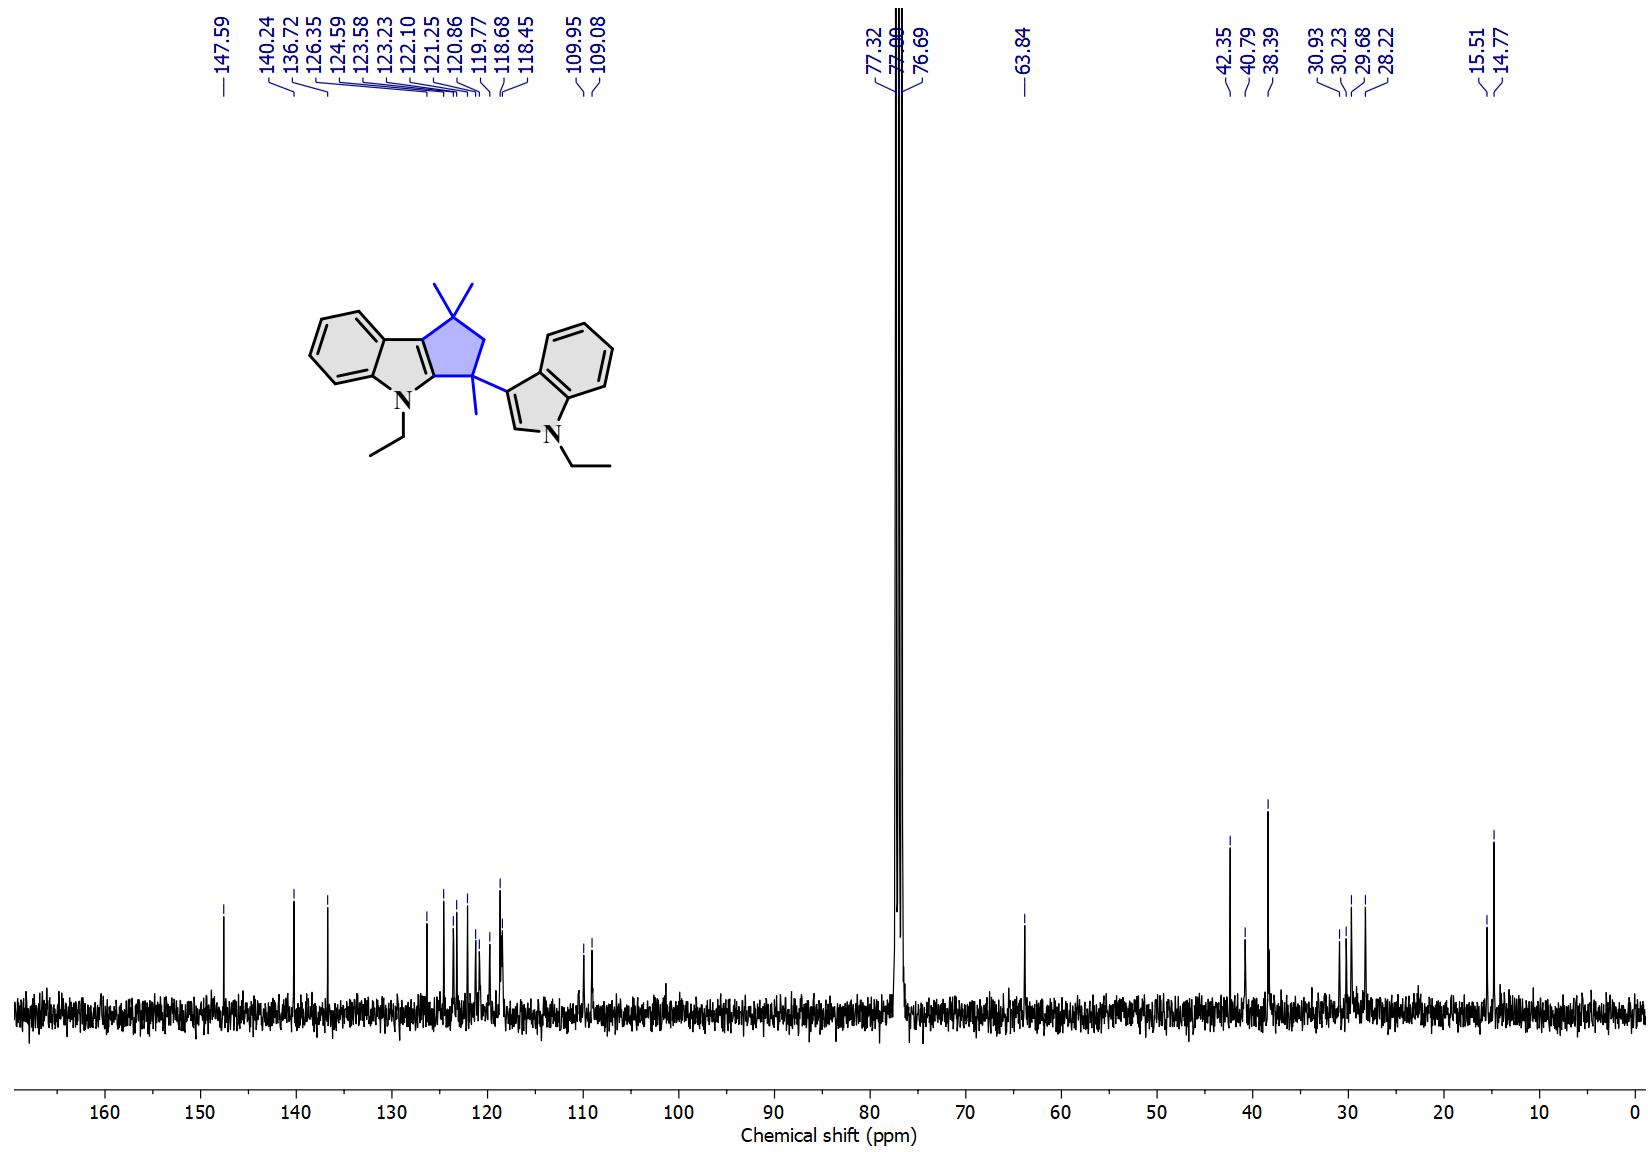

Fig. S18 100 MHz  $^{13}\text{C}$  NMR spectrum of **2i** in  $\text{CDCl}_3$

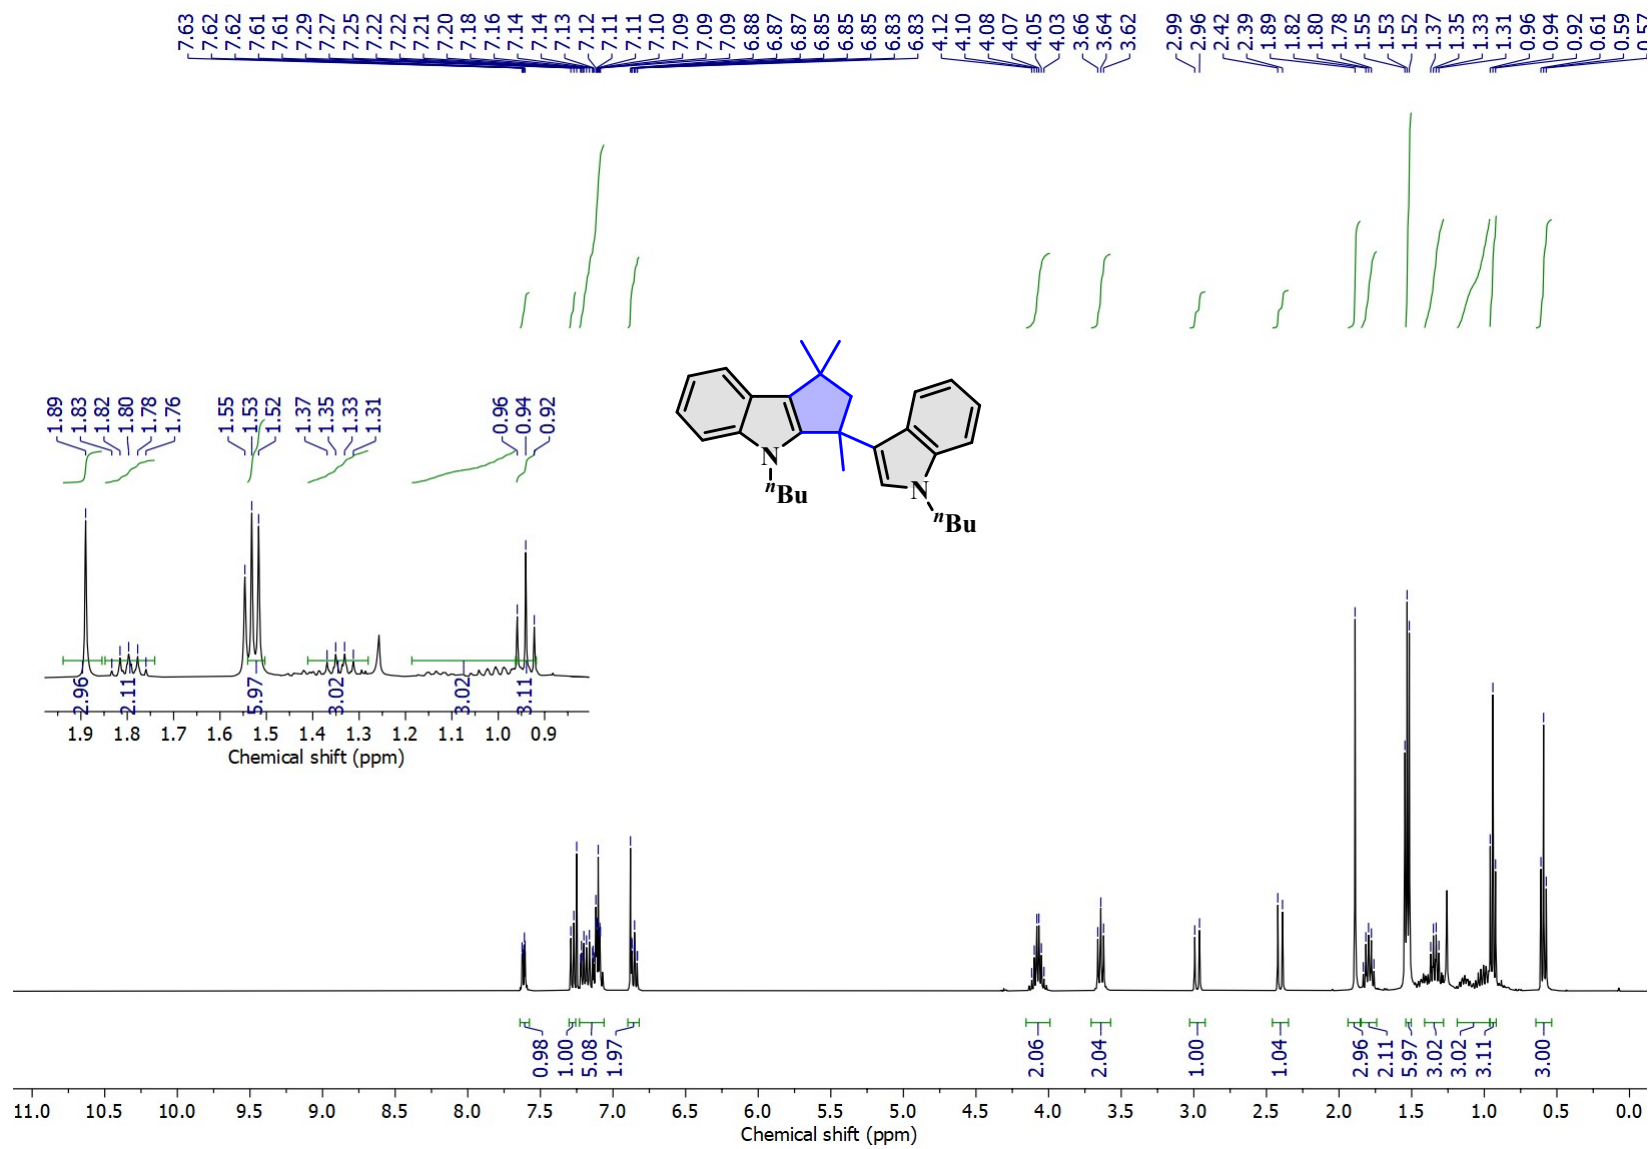

Fig. S19 400 MHz <sup>1</sup>H NMR spectrum of **2j** in CDCl<sub>3</sub>

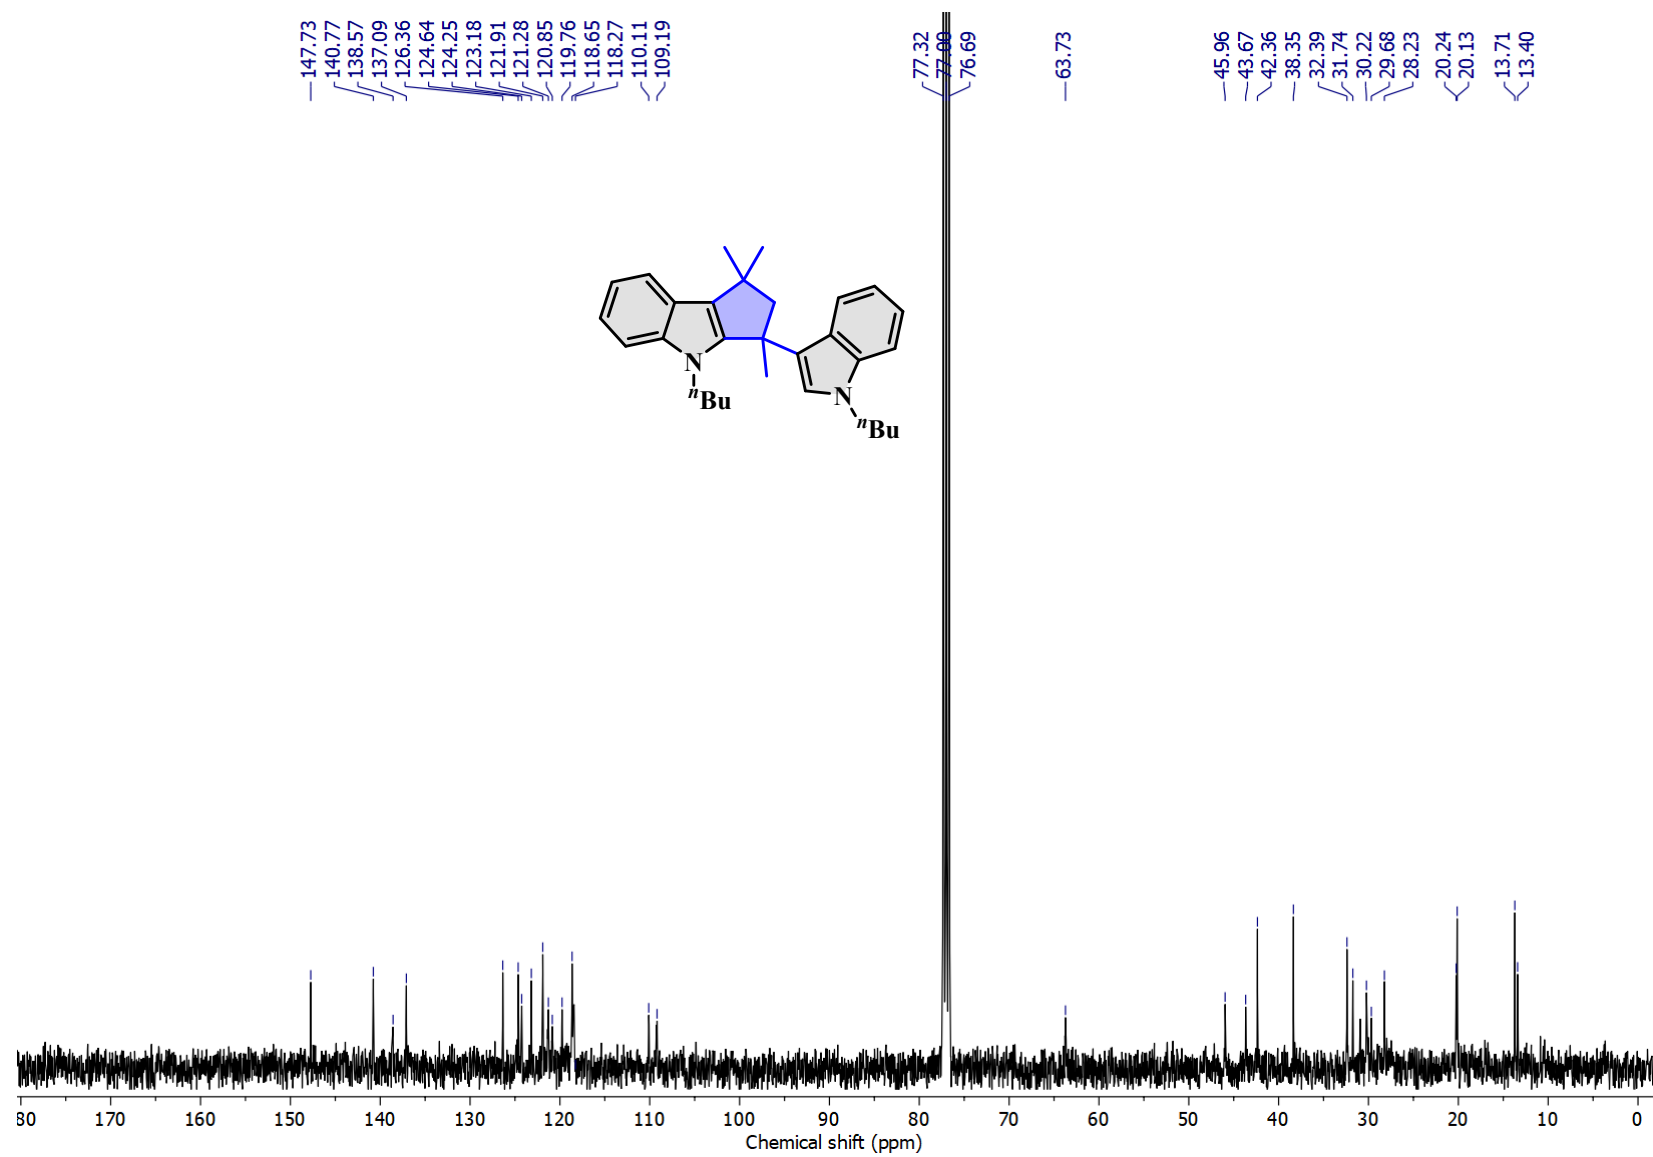

Fig. S20 100 MHz  $^{13}\text{C}$  NMR spectrum of **2j** in  $\text{CDCl}_3$

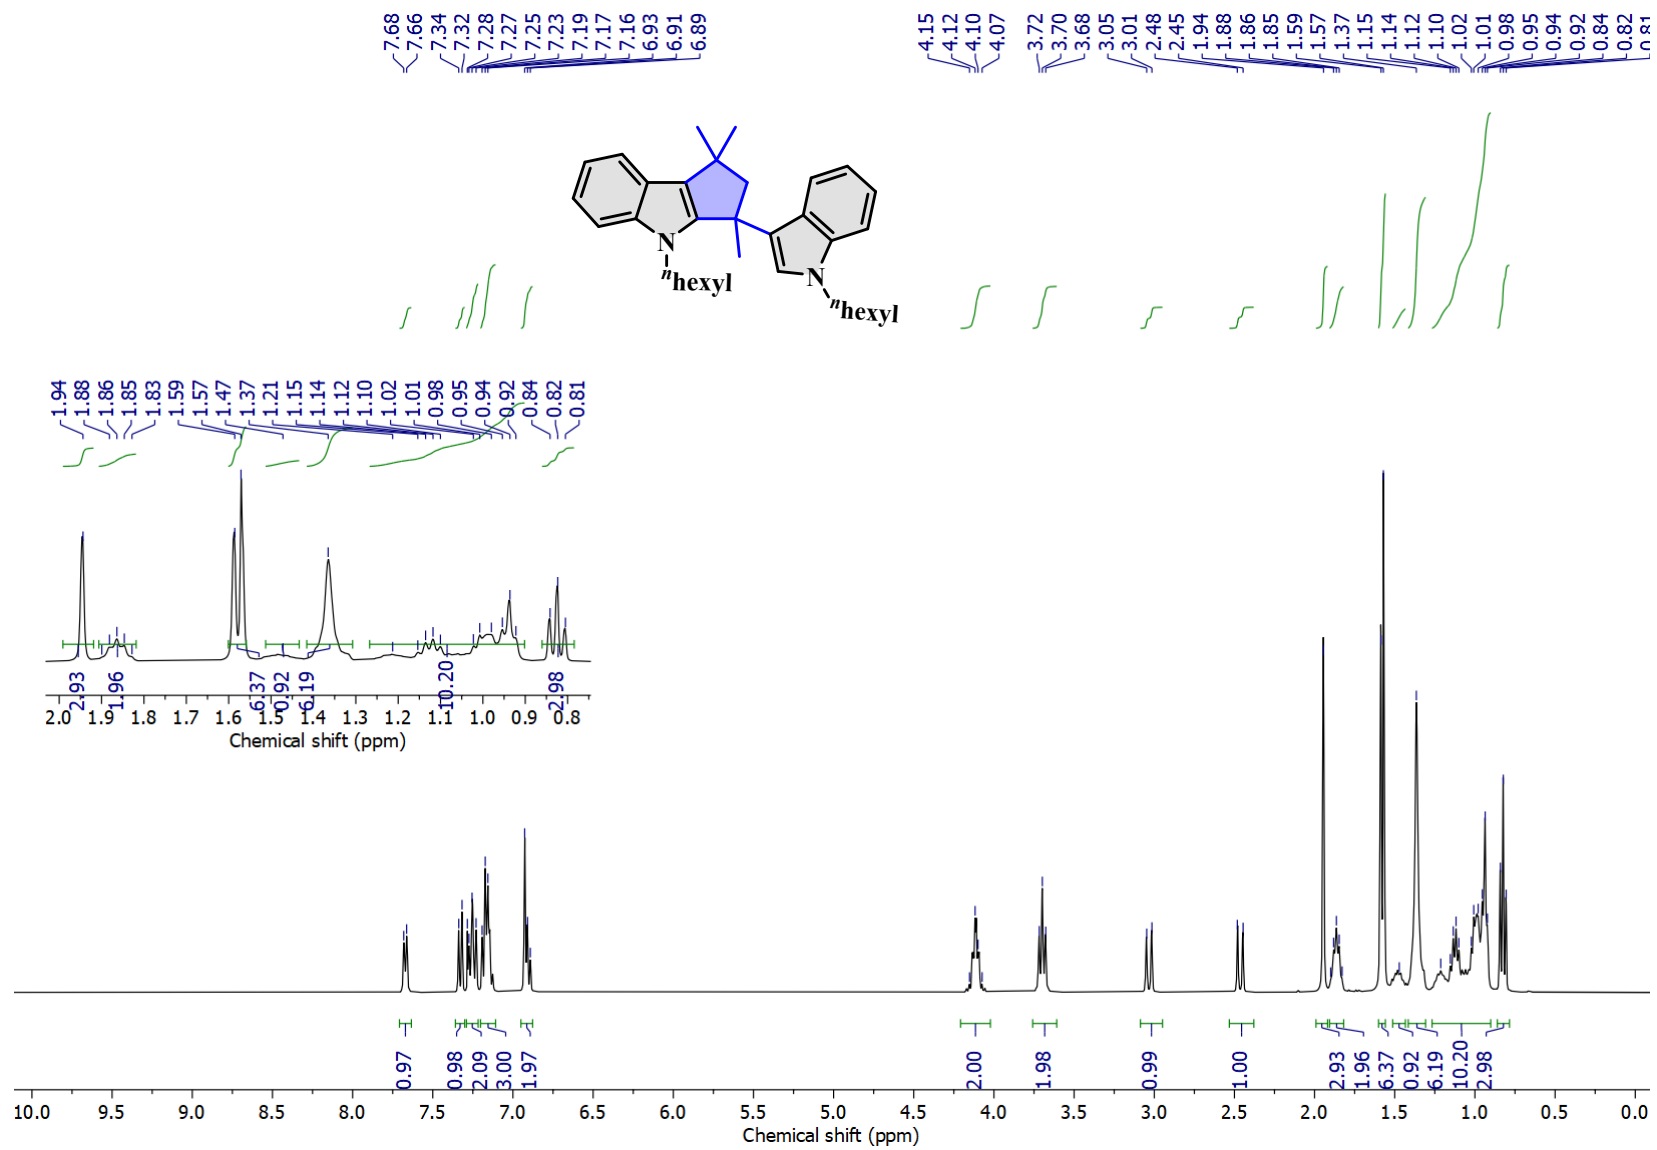

Fig. S21 400 MHz <sup>1</sup>H NMR spectrum of **2k** in CDCl<sub>3</sub>

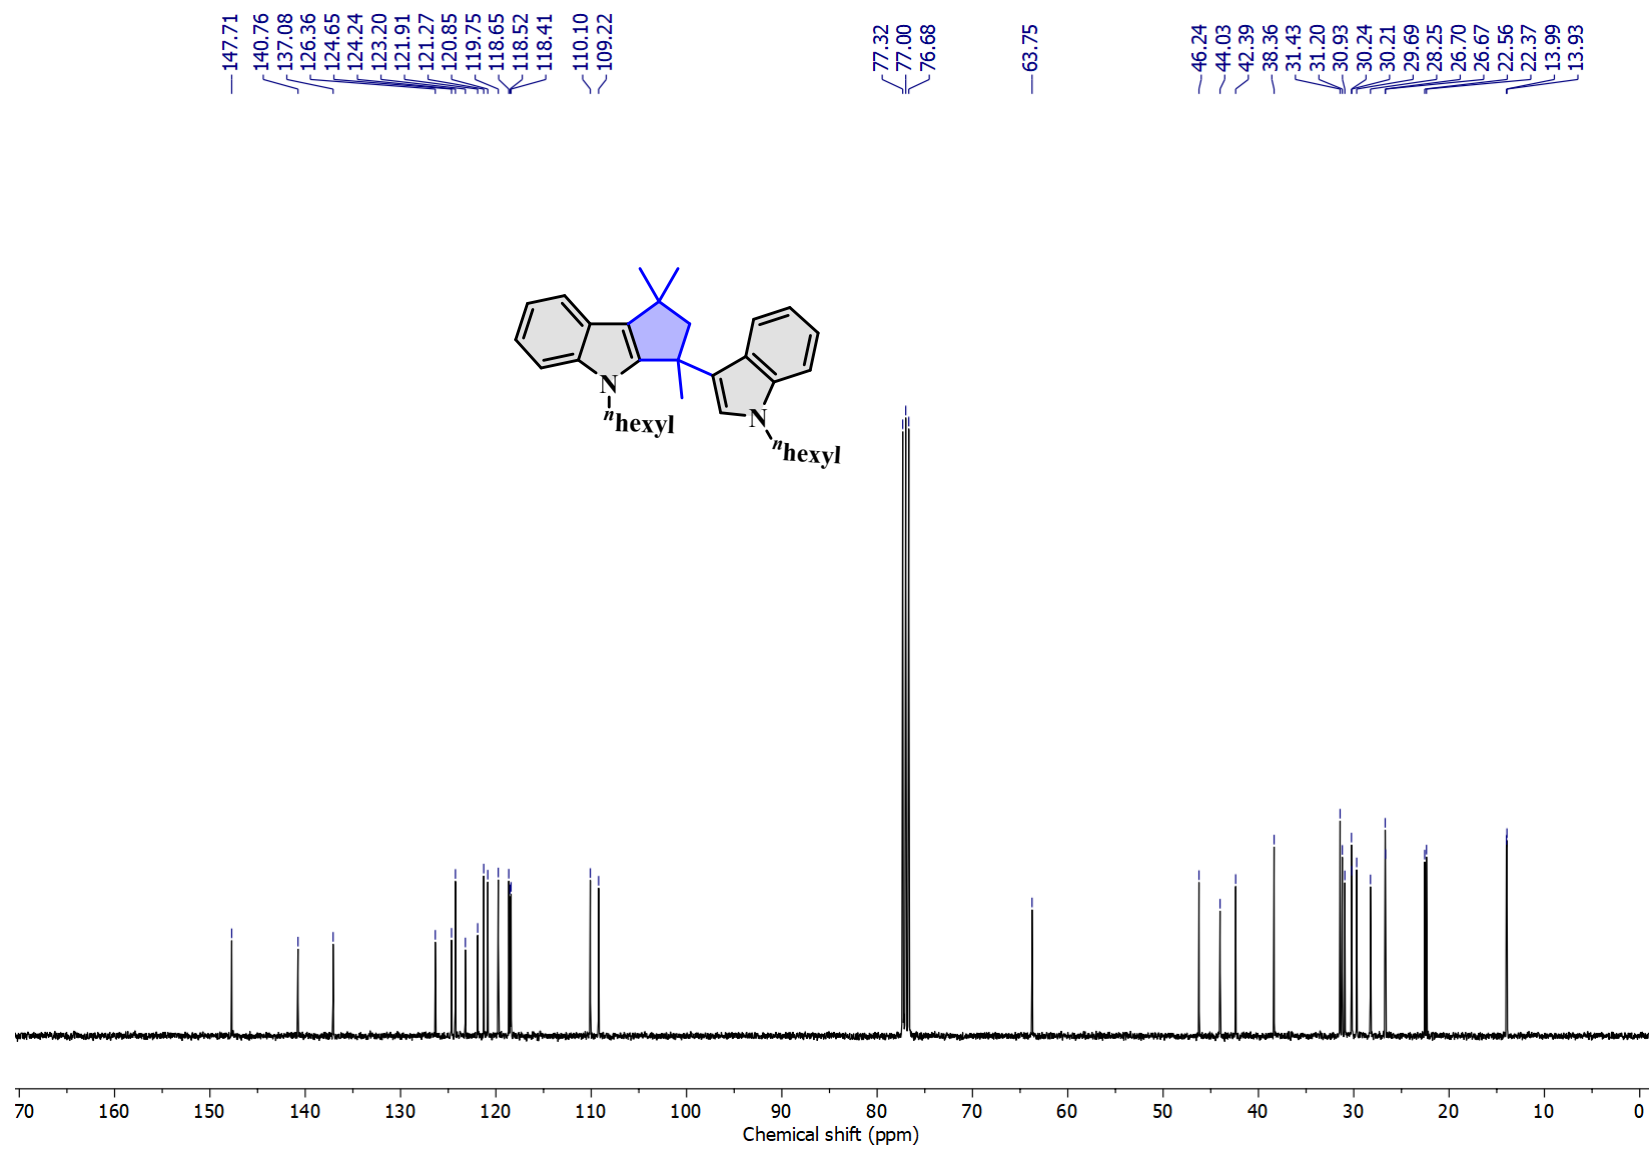

**Fig. S22** 100 MHz  $^{13}\text{C}$  NMR spectrum of **2k** in  $\text{CDCl}_3$

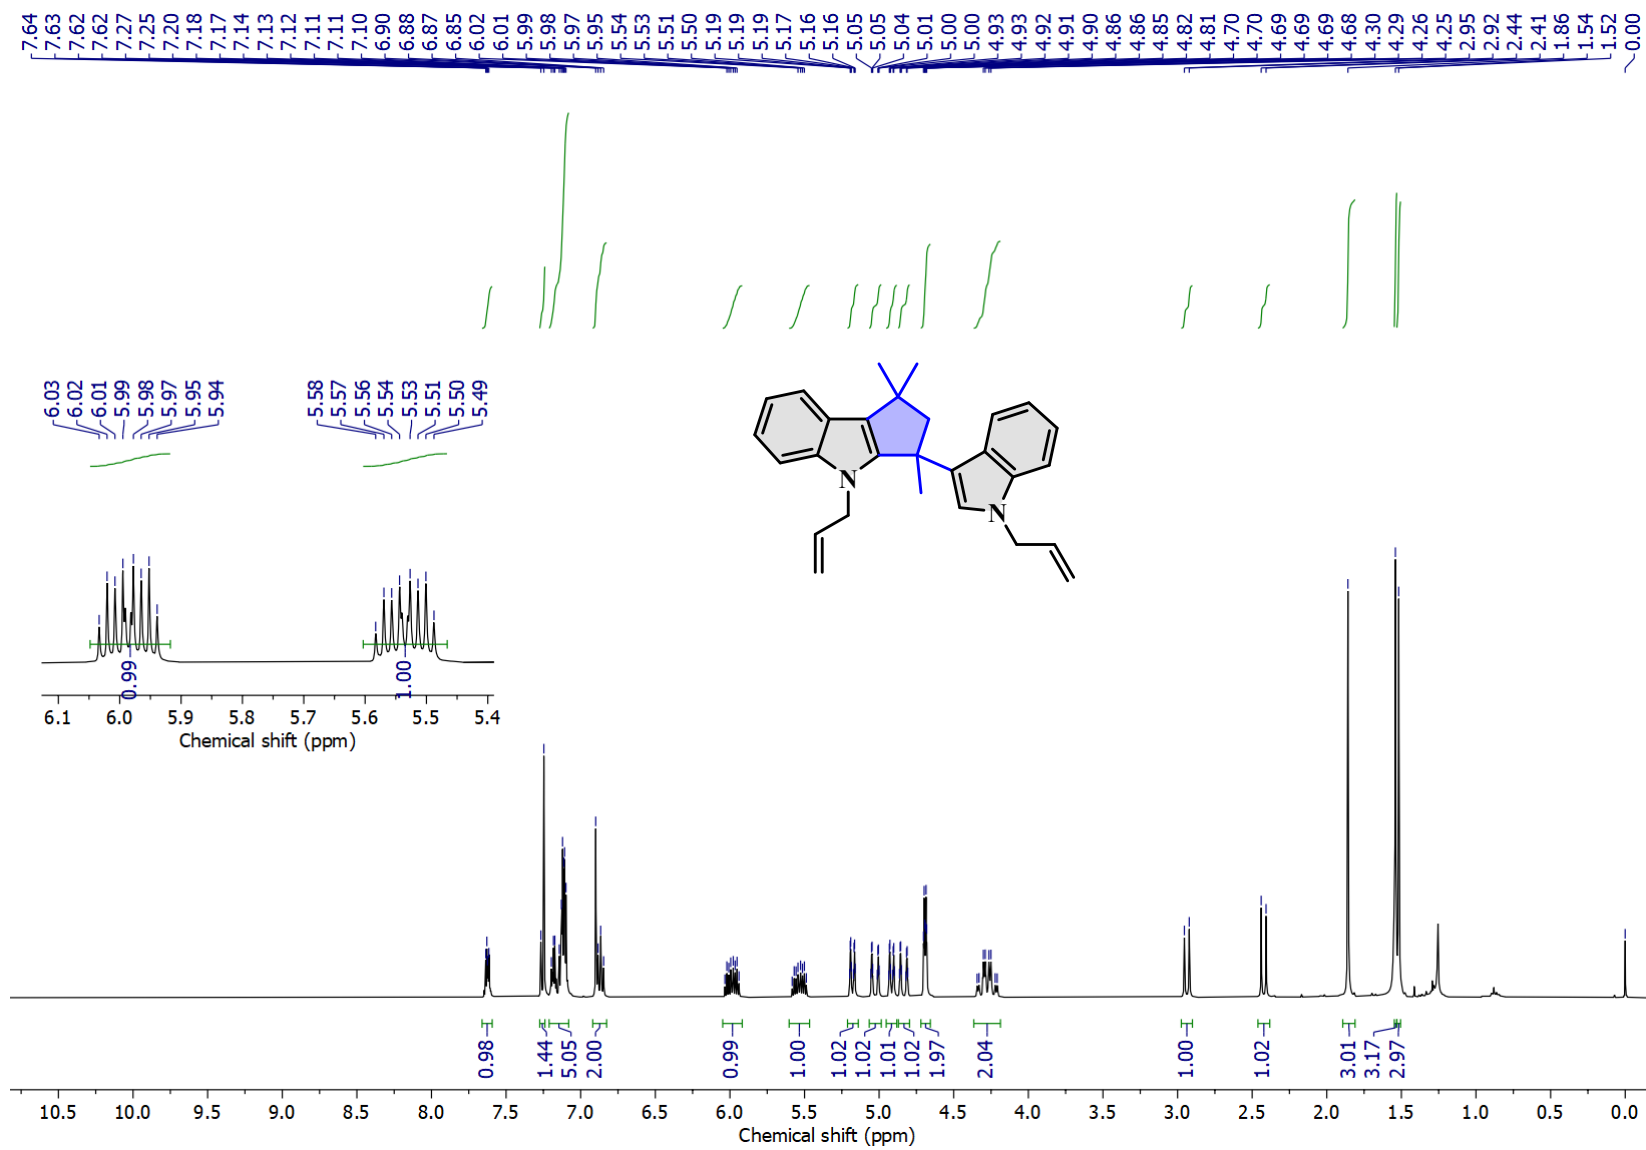

Fig. S23 400 MHz  $^1\text{H}$  NMR spectrum of **21** in  $\text{CDCl}_3$



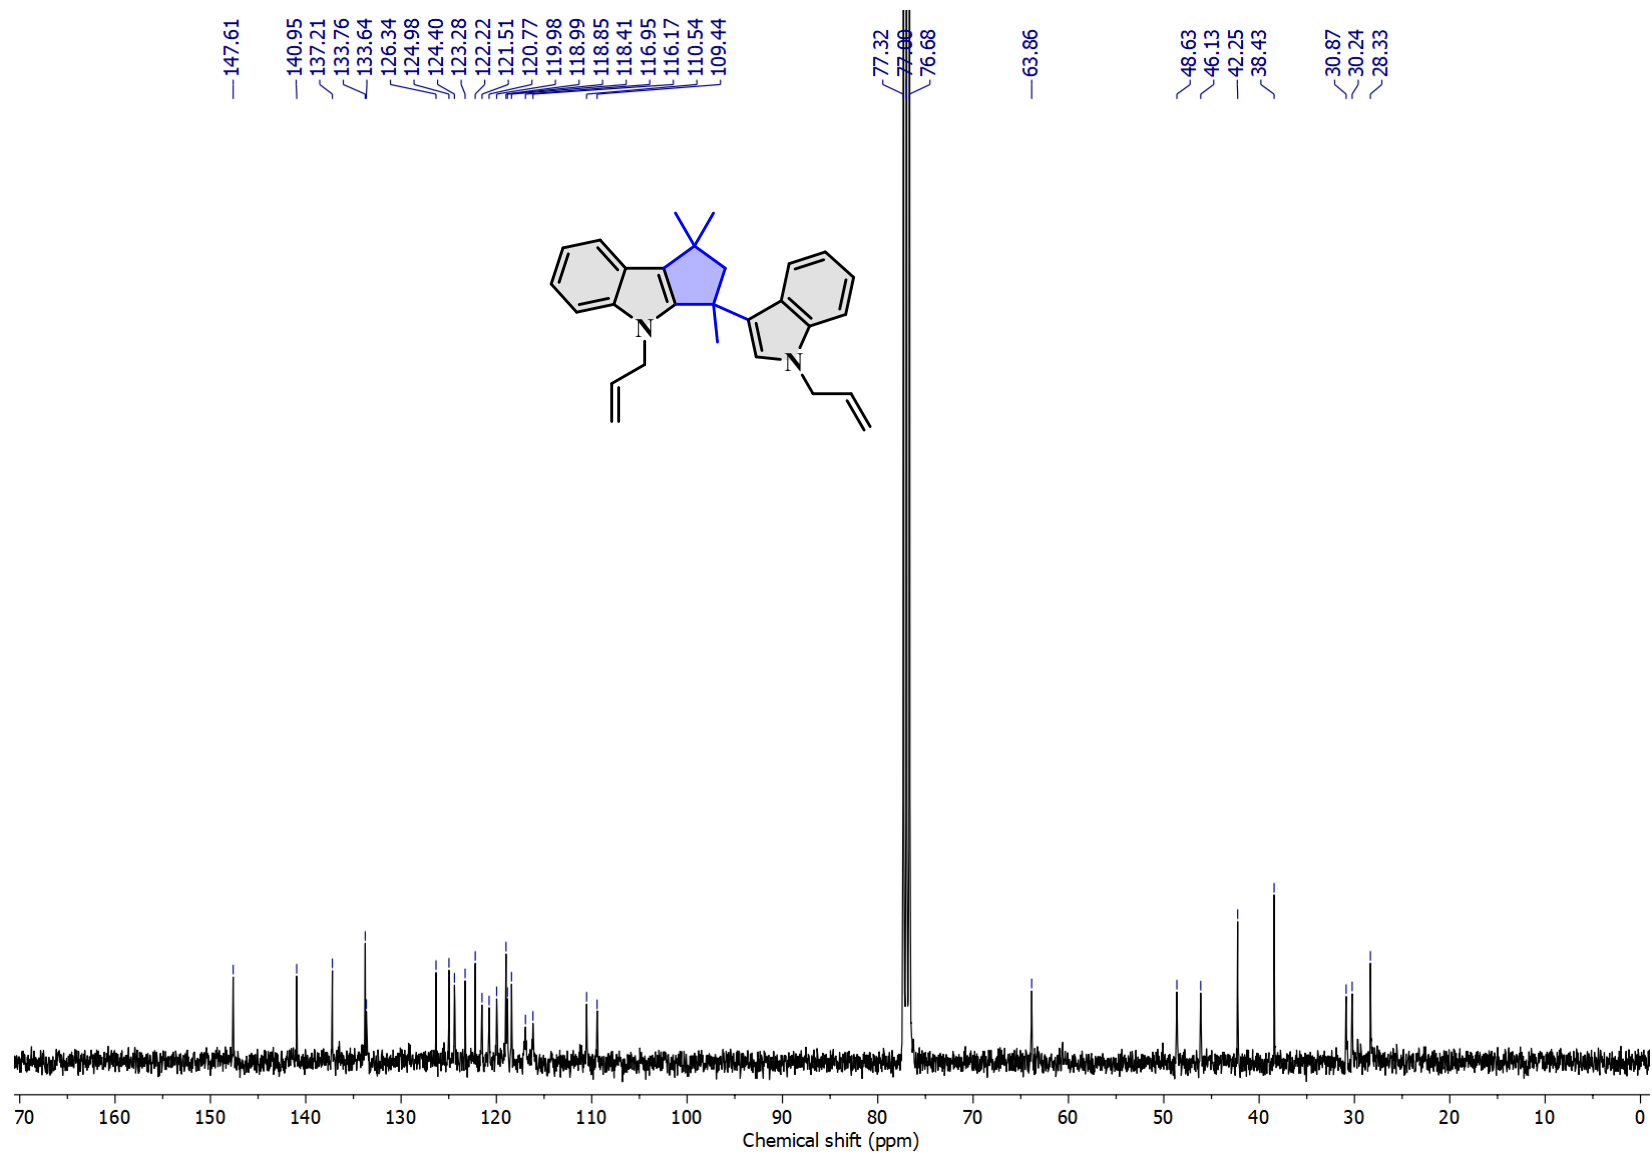

Fig. S24 100 MHz <sup>13</sup>C NMR spectrum of **2I** in CDCl<sub>3</sub>

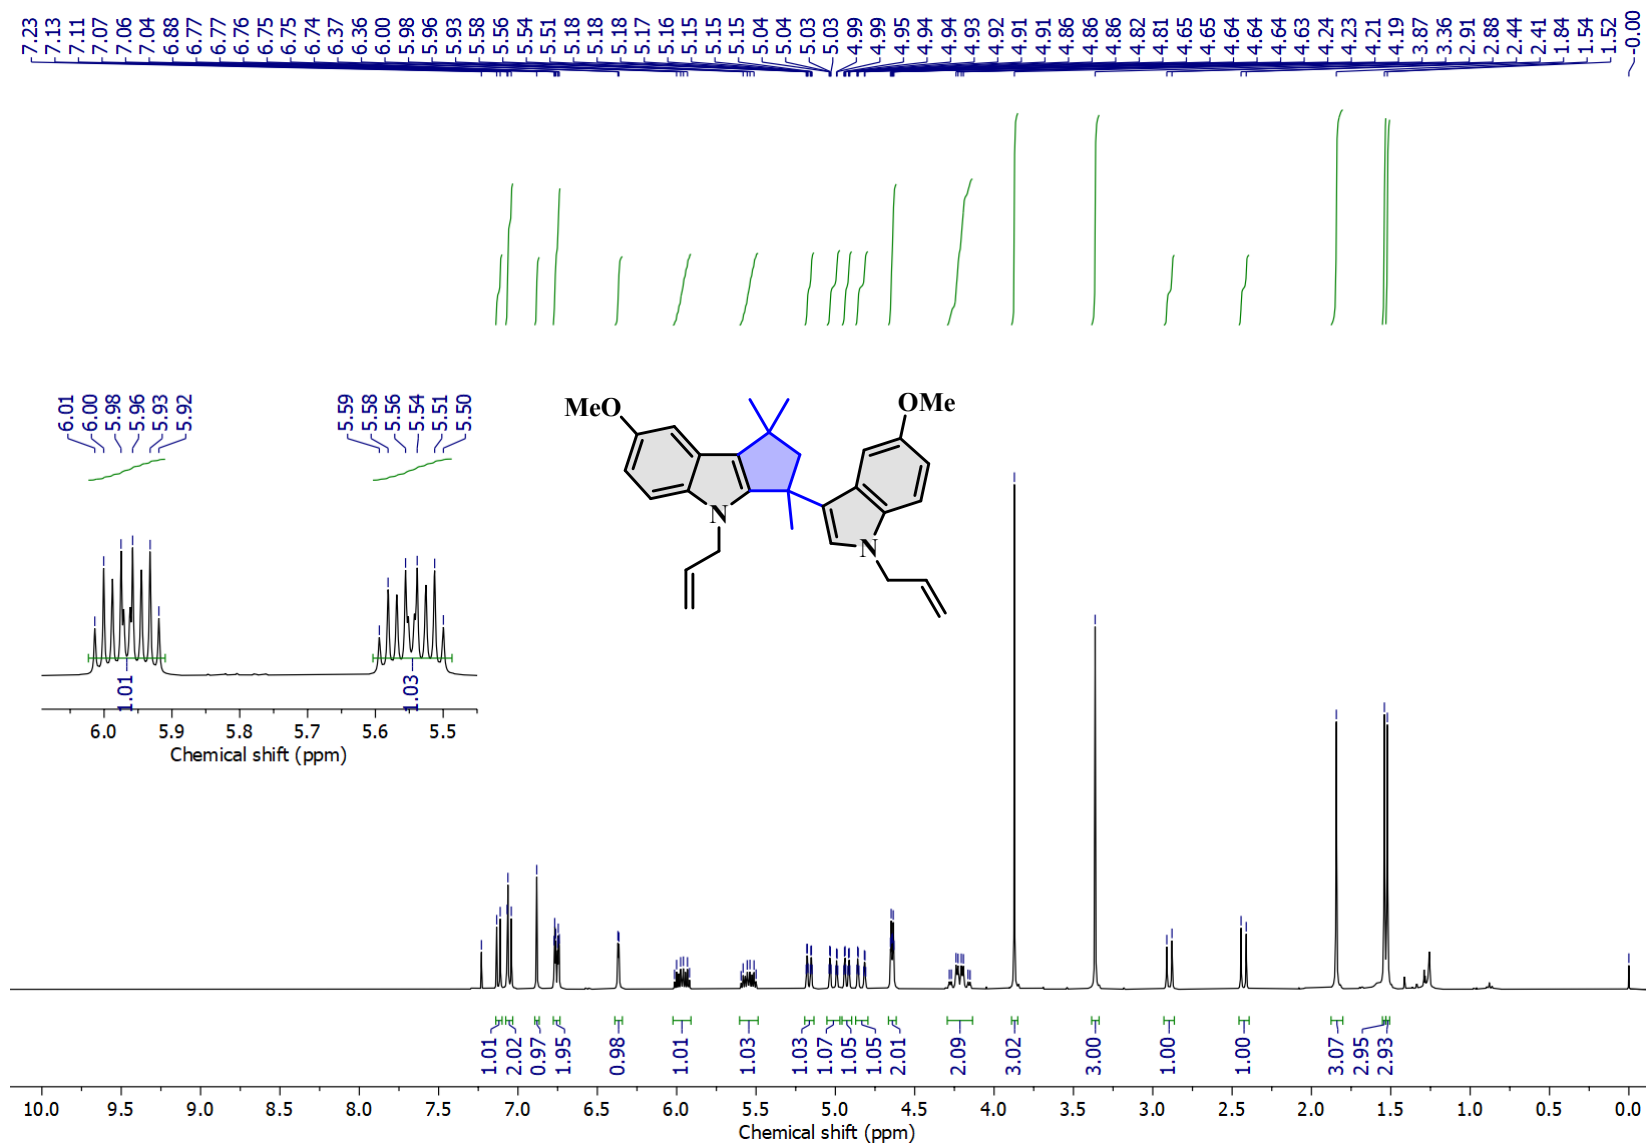

Fig. S25 400 MHz  $^1\text{H}$  NMR spectrum of **2m** in  $\text{CDCl}_3$

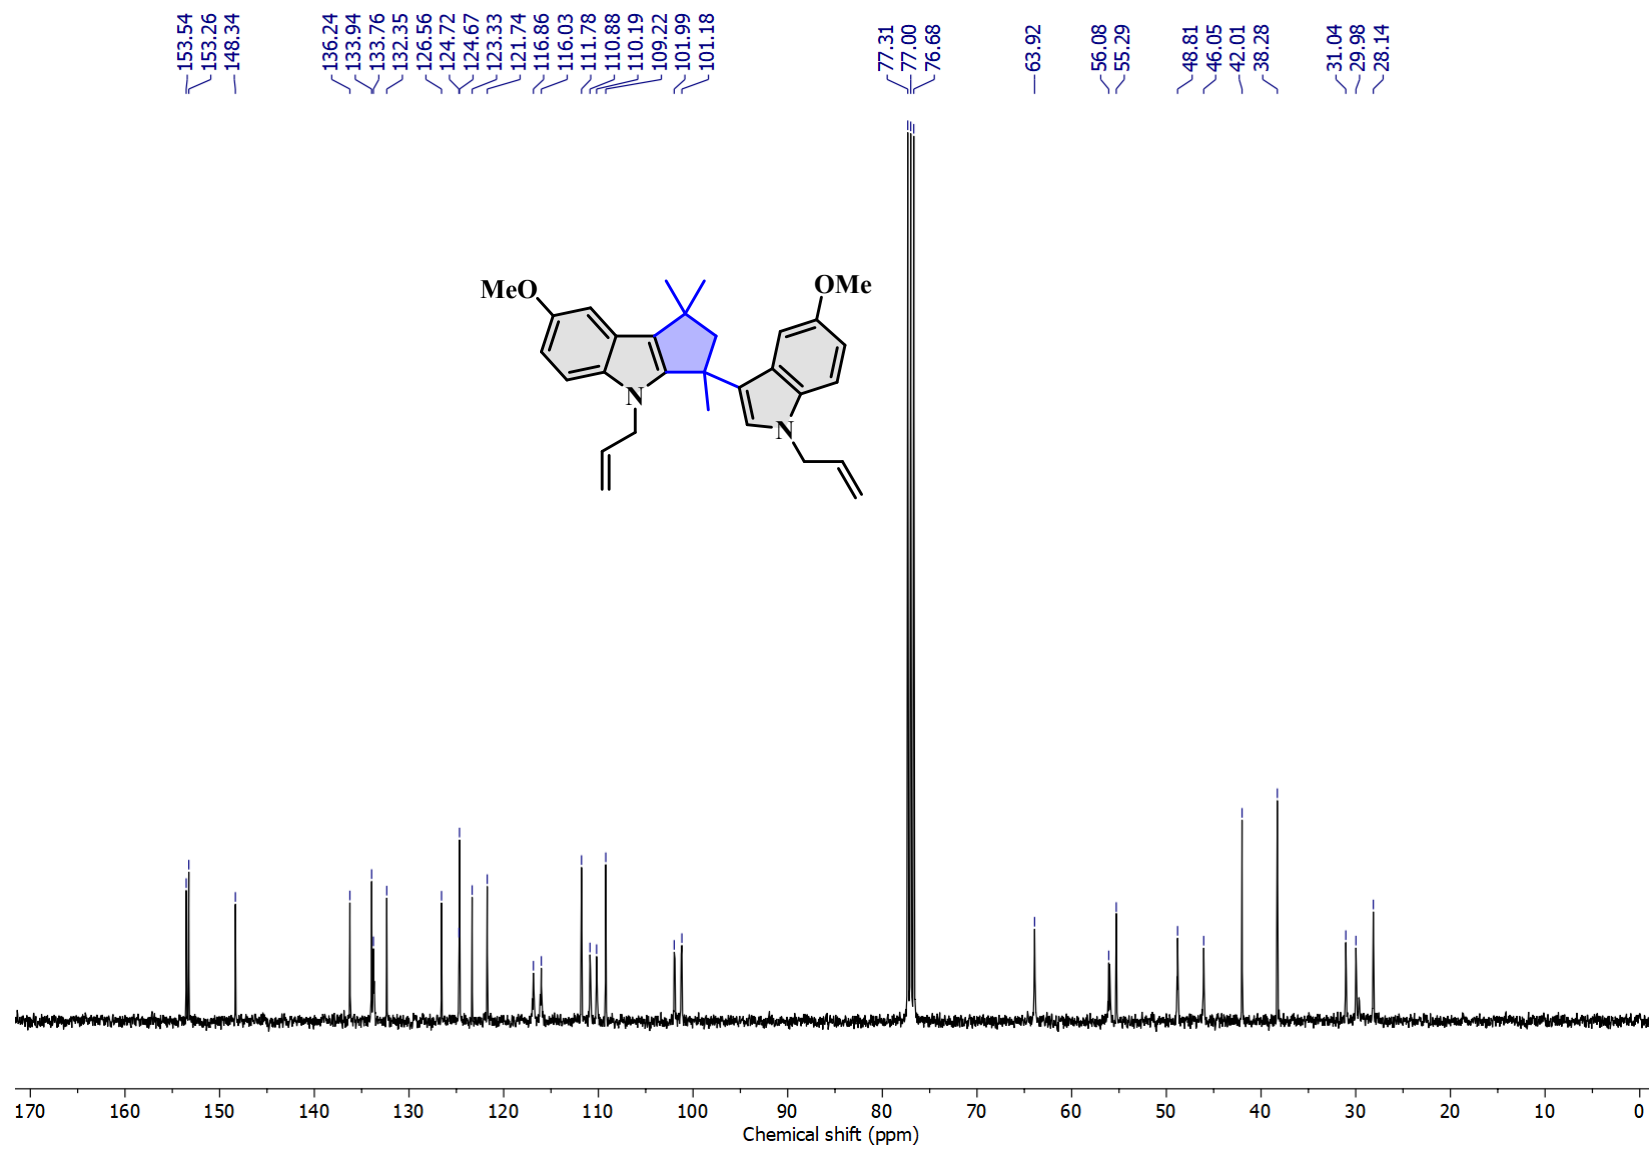

Fig. S26 100 MHz  $^{13}\text{C}$  NMR spectrum of **2m** in  $\text{CDCl}_3$

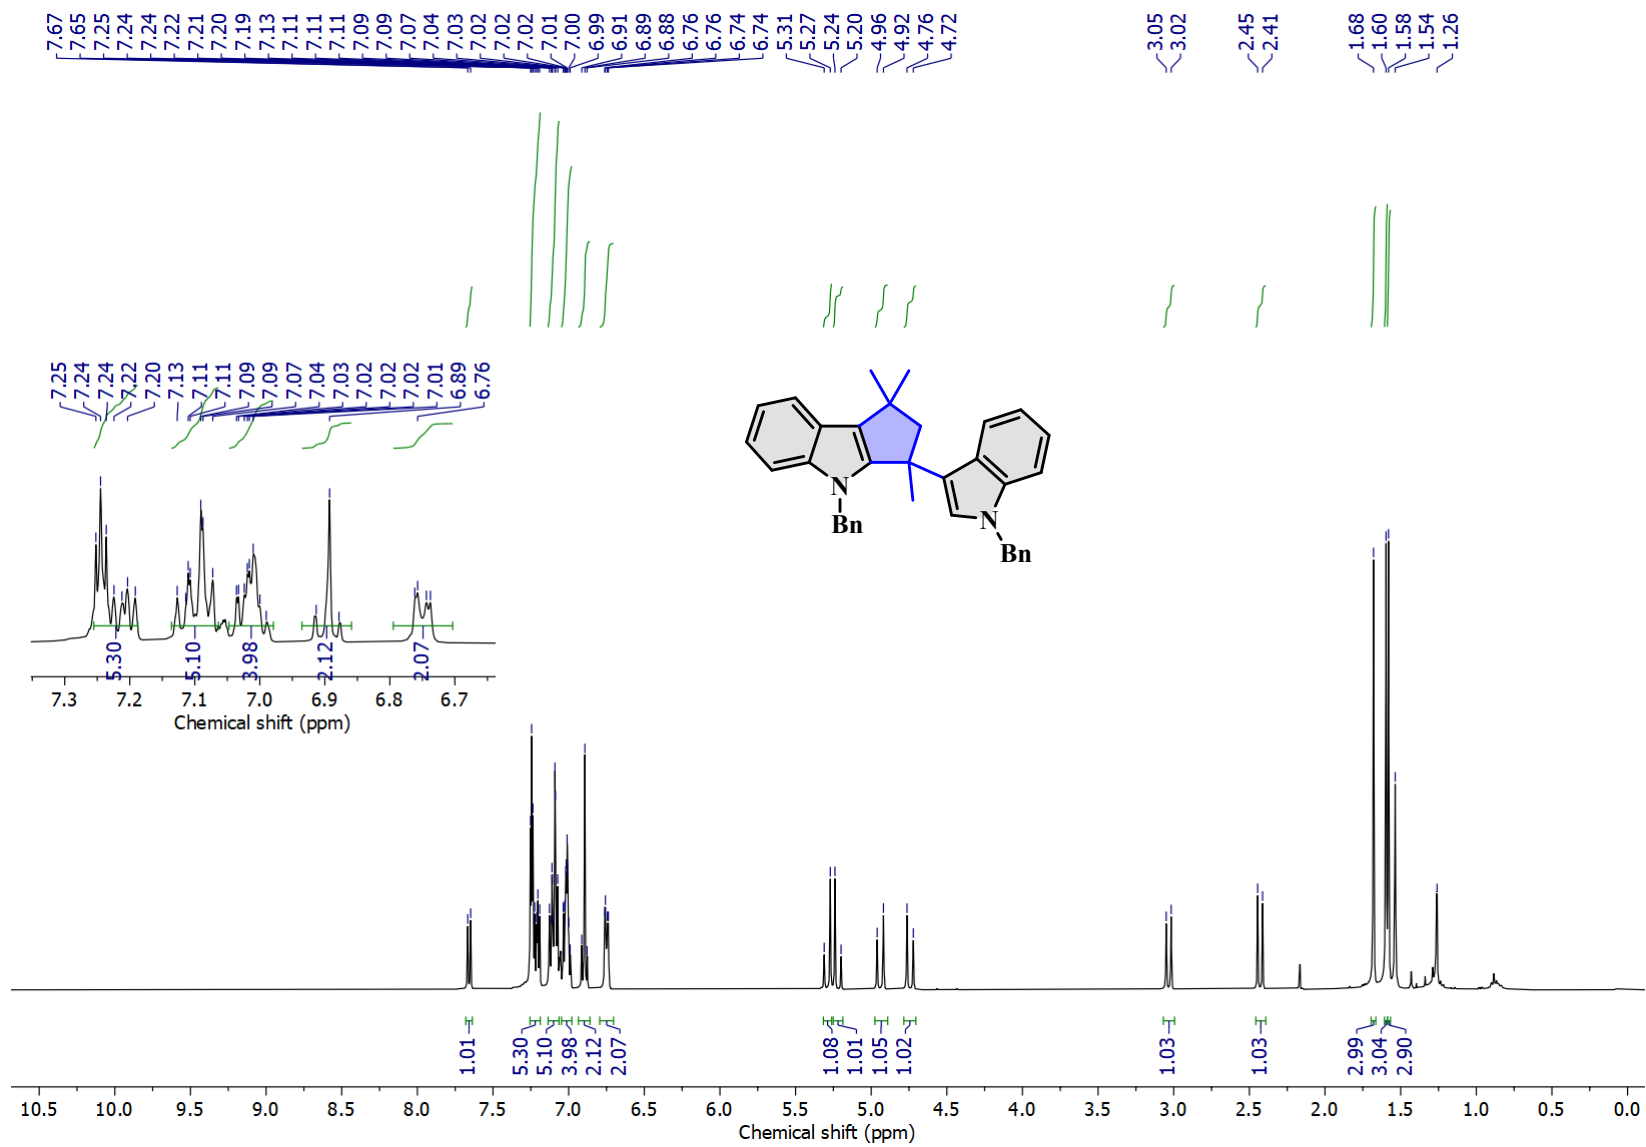

Fig. S27 400 MHz <sup>1</sup>H NMR spectrum of **2n** in CDCl<sub>3</sub>

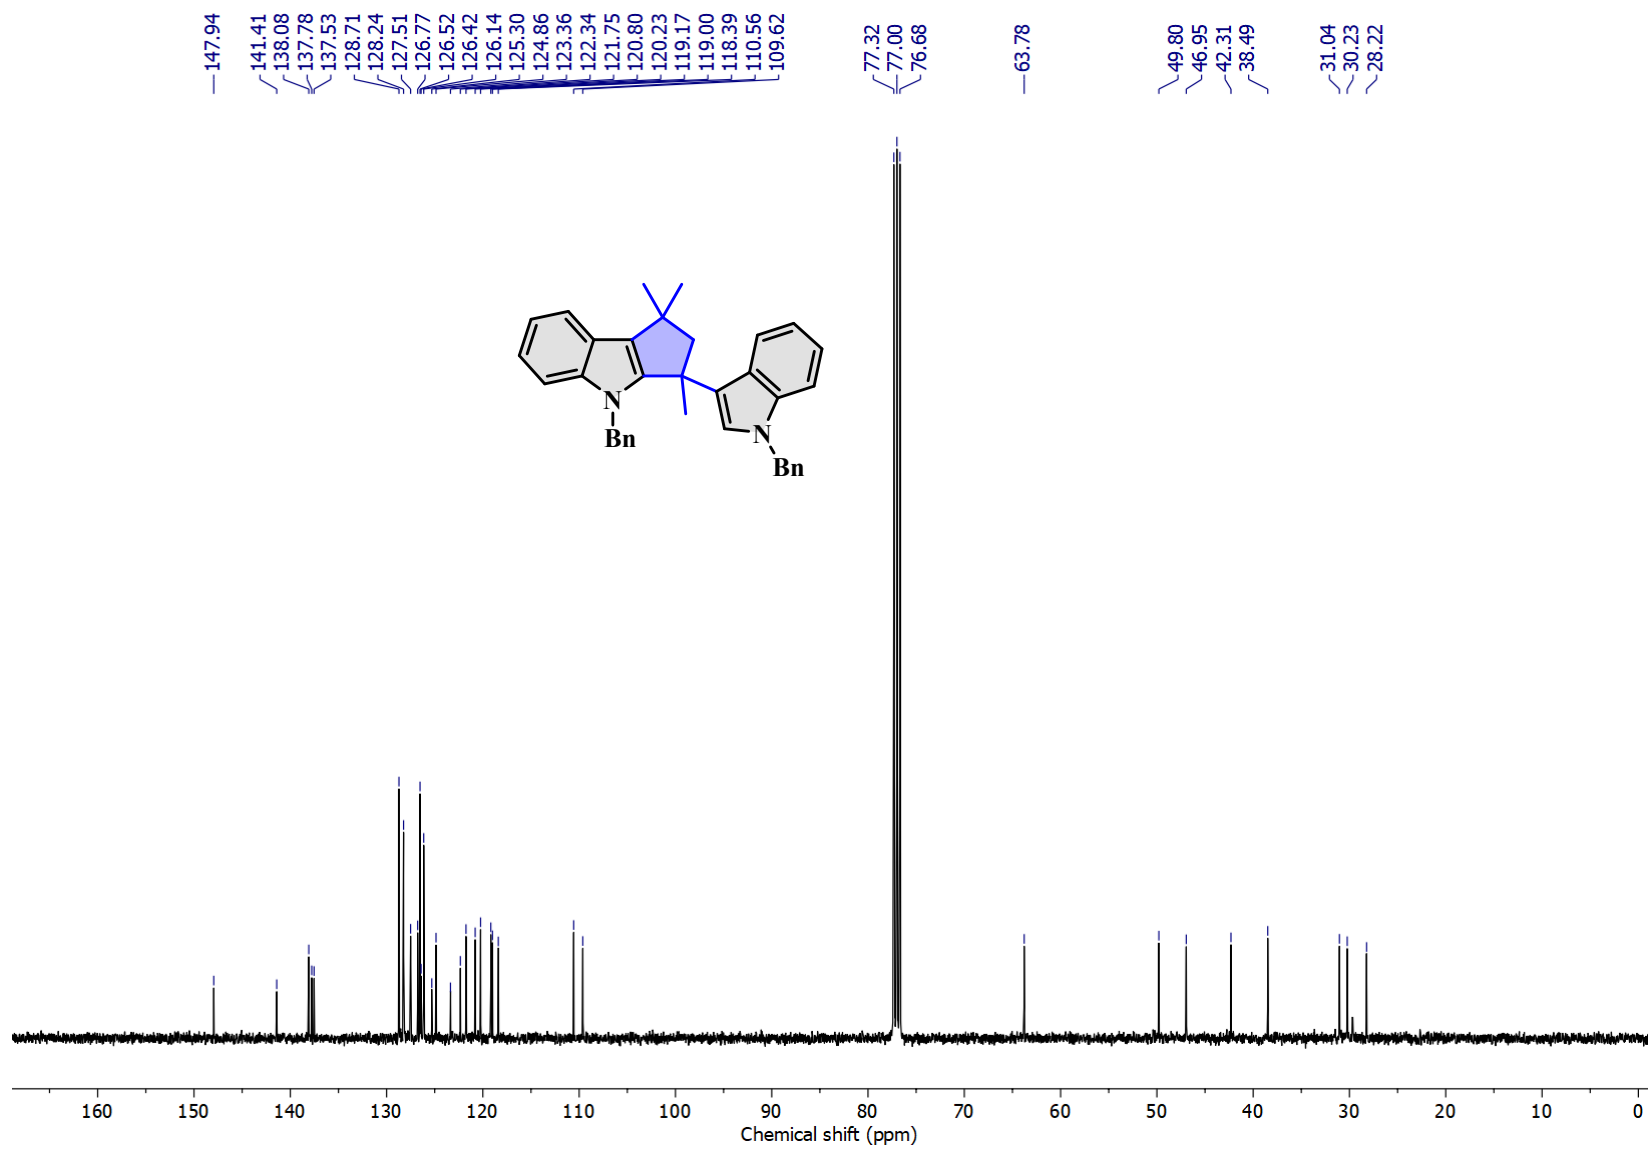

Fig. S28 100 MHz  $^{13}\text{C}$  NMR spectrum of **2n** in  $\text{CDCl}_3$

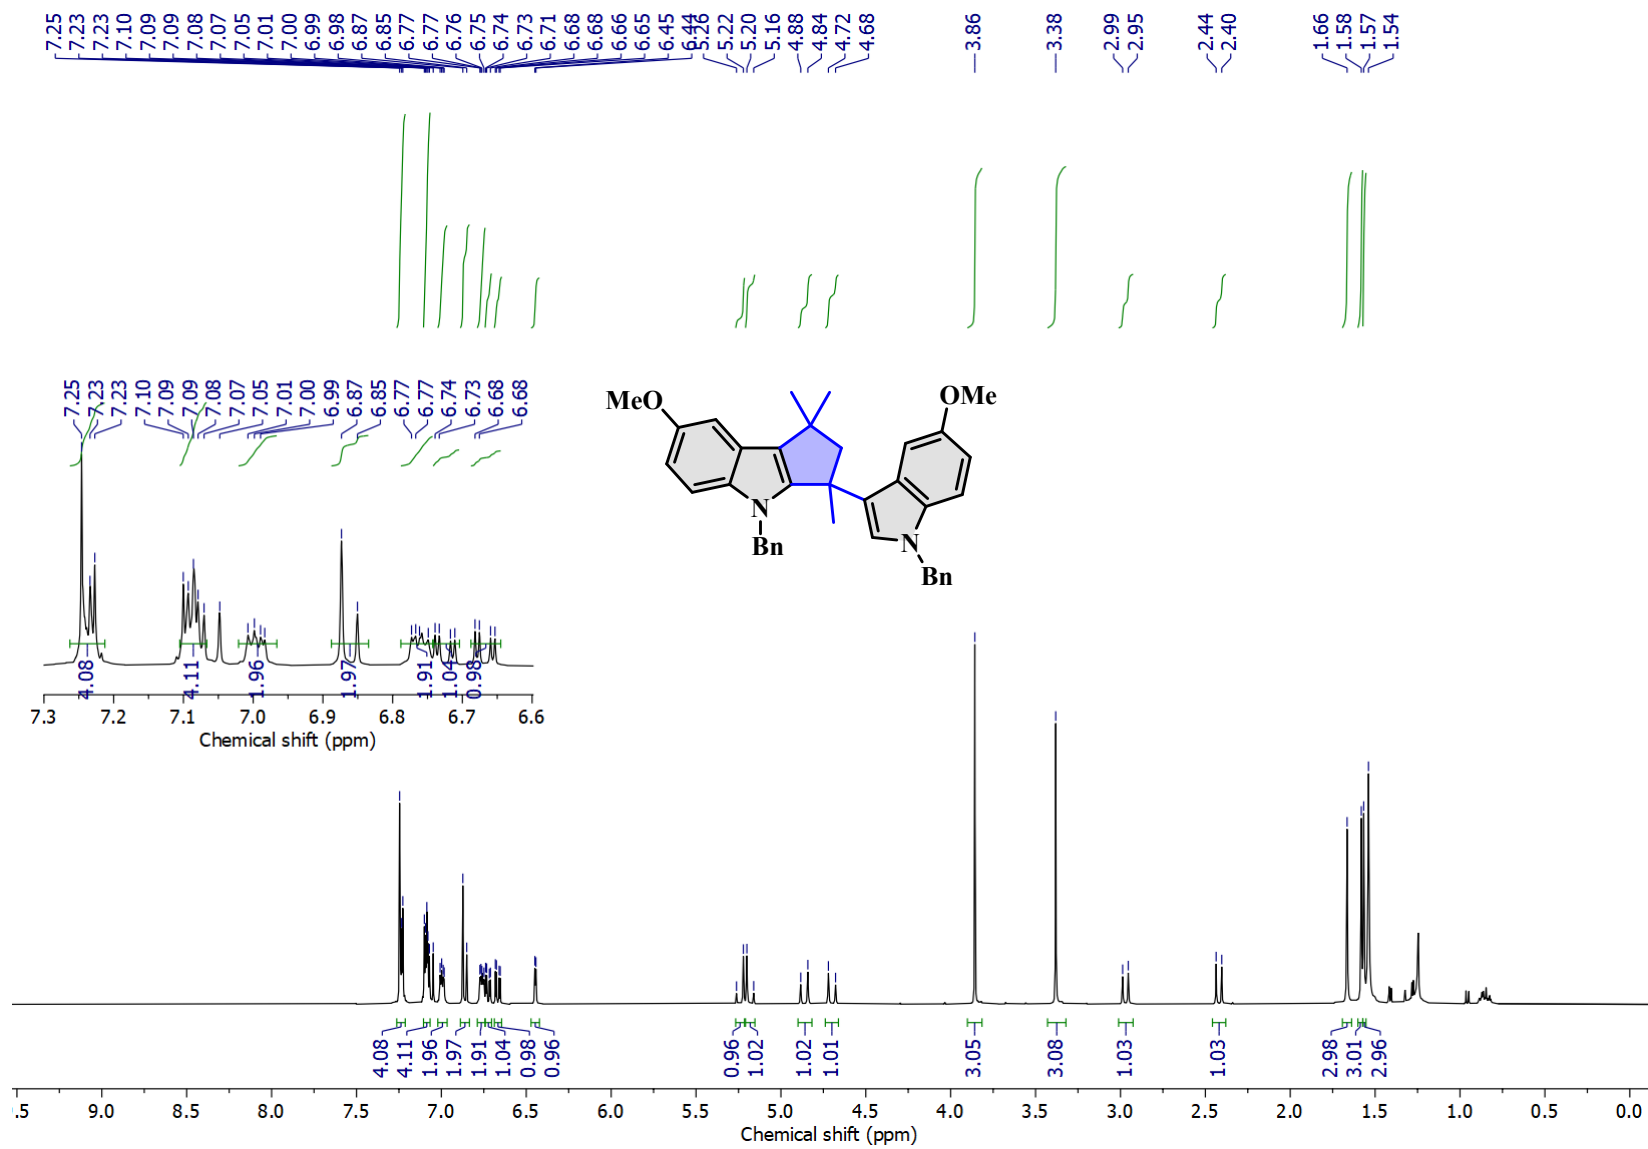

Fig. S29 400 MHz  $^1\text{H}$  NMR spectrum of **2o** in  $\text{CDCl}_3$

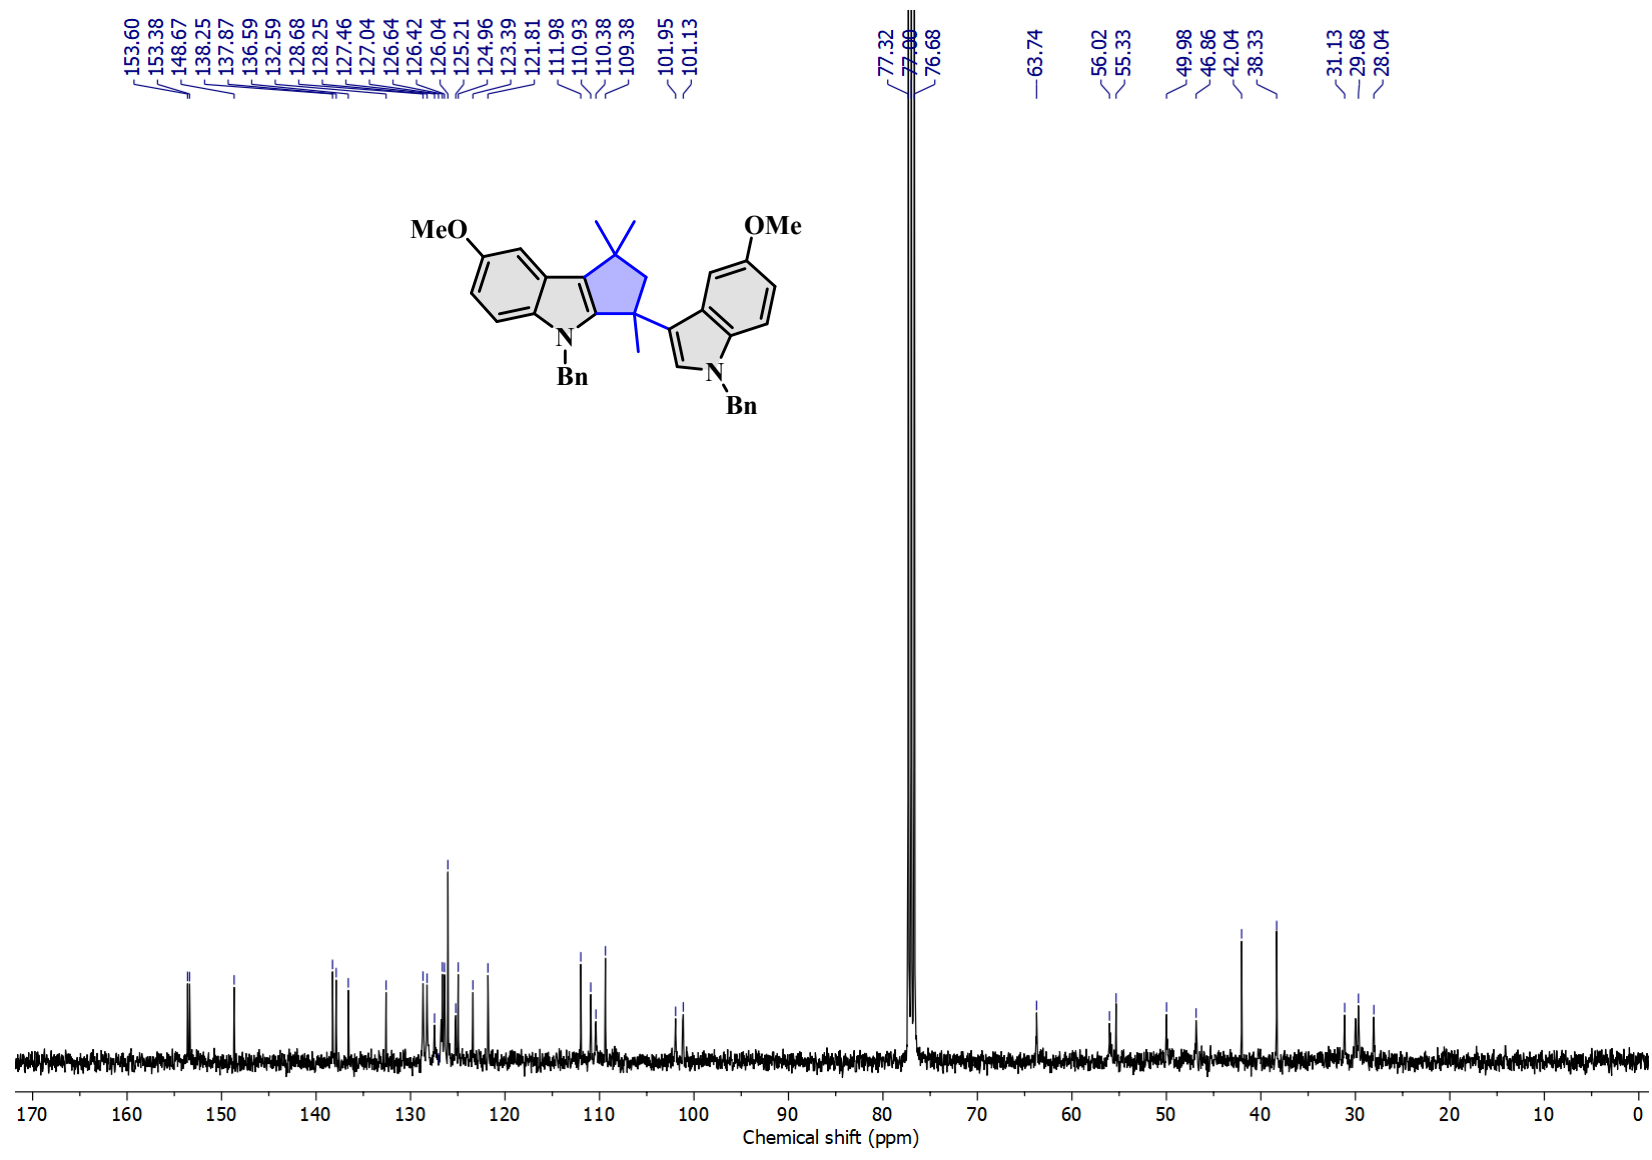

Fig. S30 100 MHz  $^{13}\text{C}$  NMR spectrum of **2o** in  $\text{CDCl}_3$

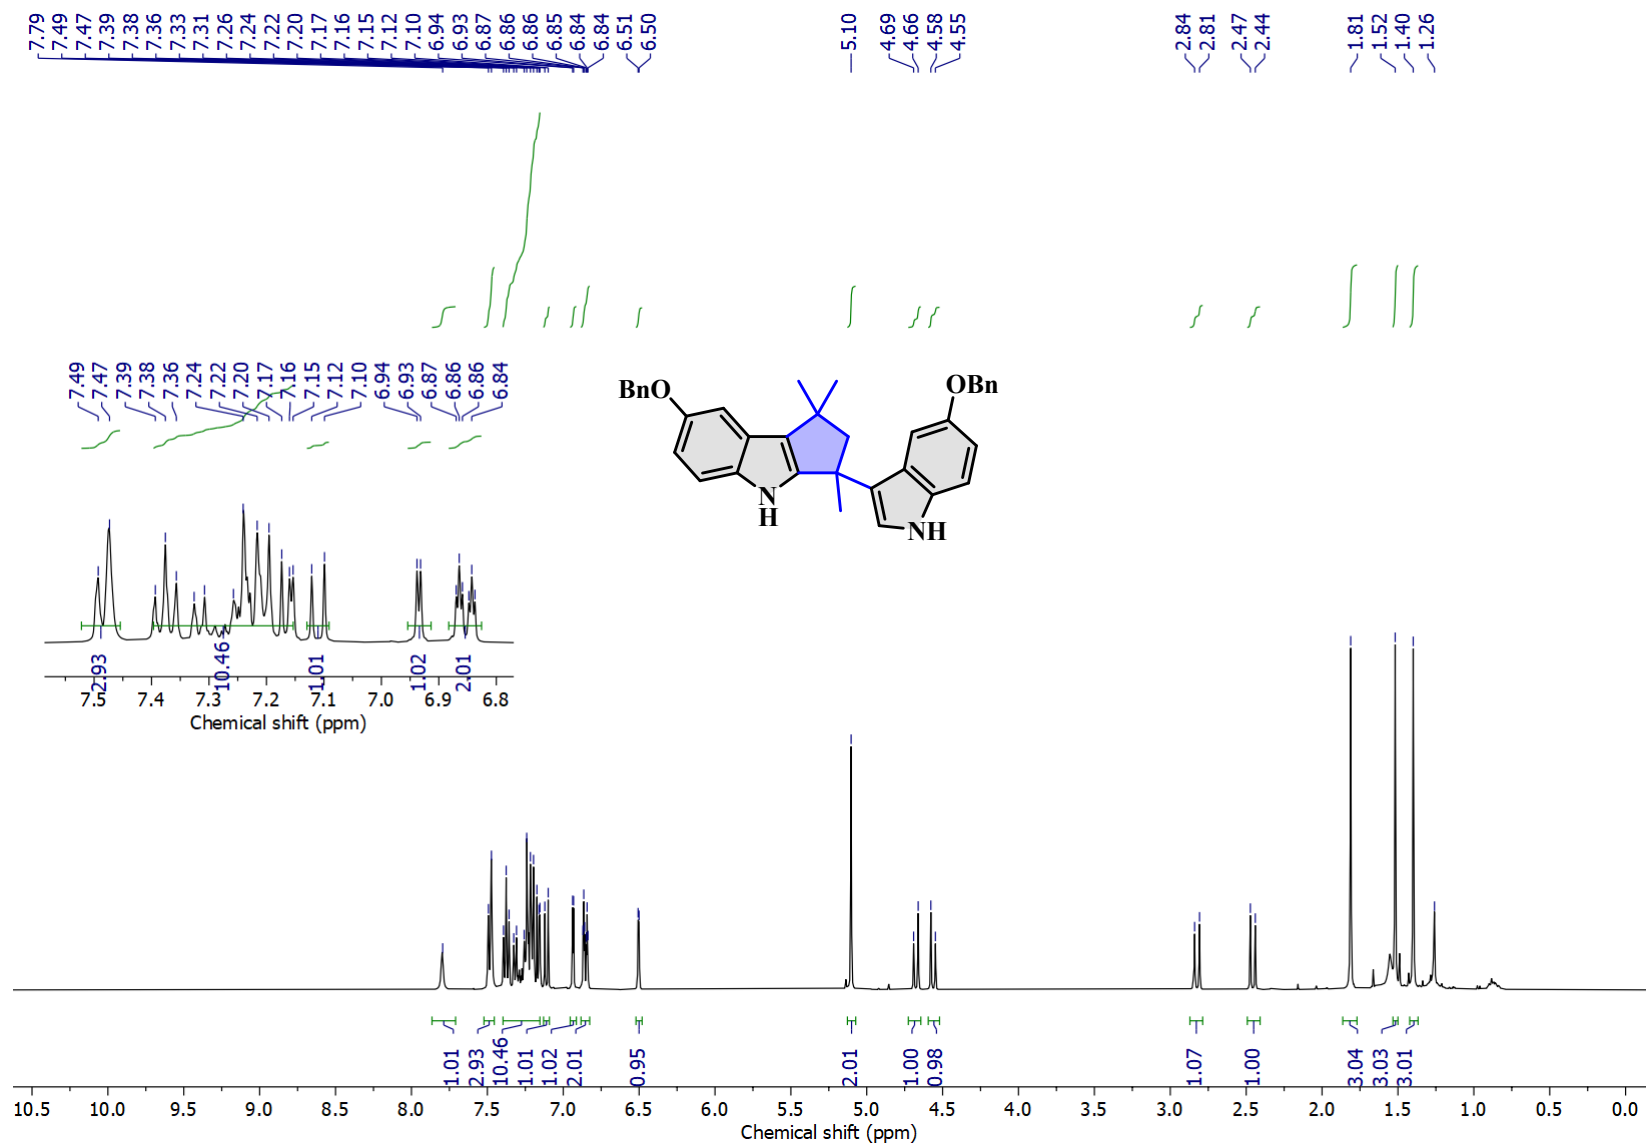

Fig. S31 400 MHz <sup>1</sup>H NMR spectrum of **2p** in CDCl<sub>3</sub>



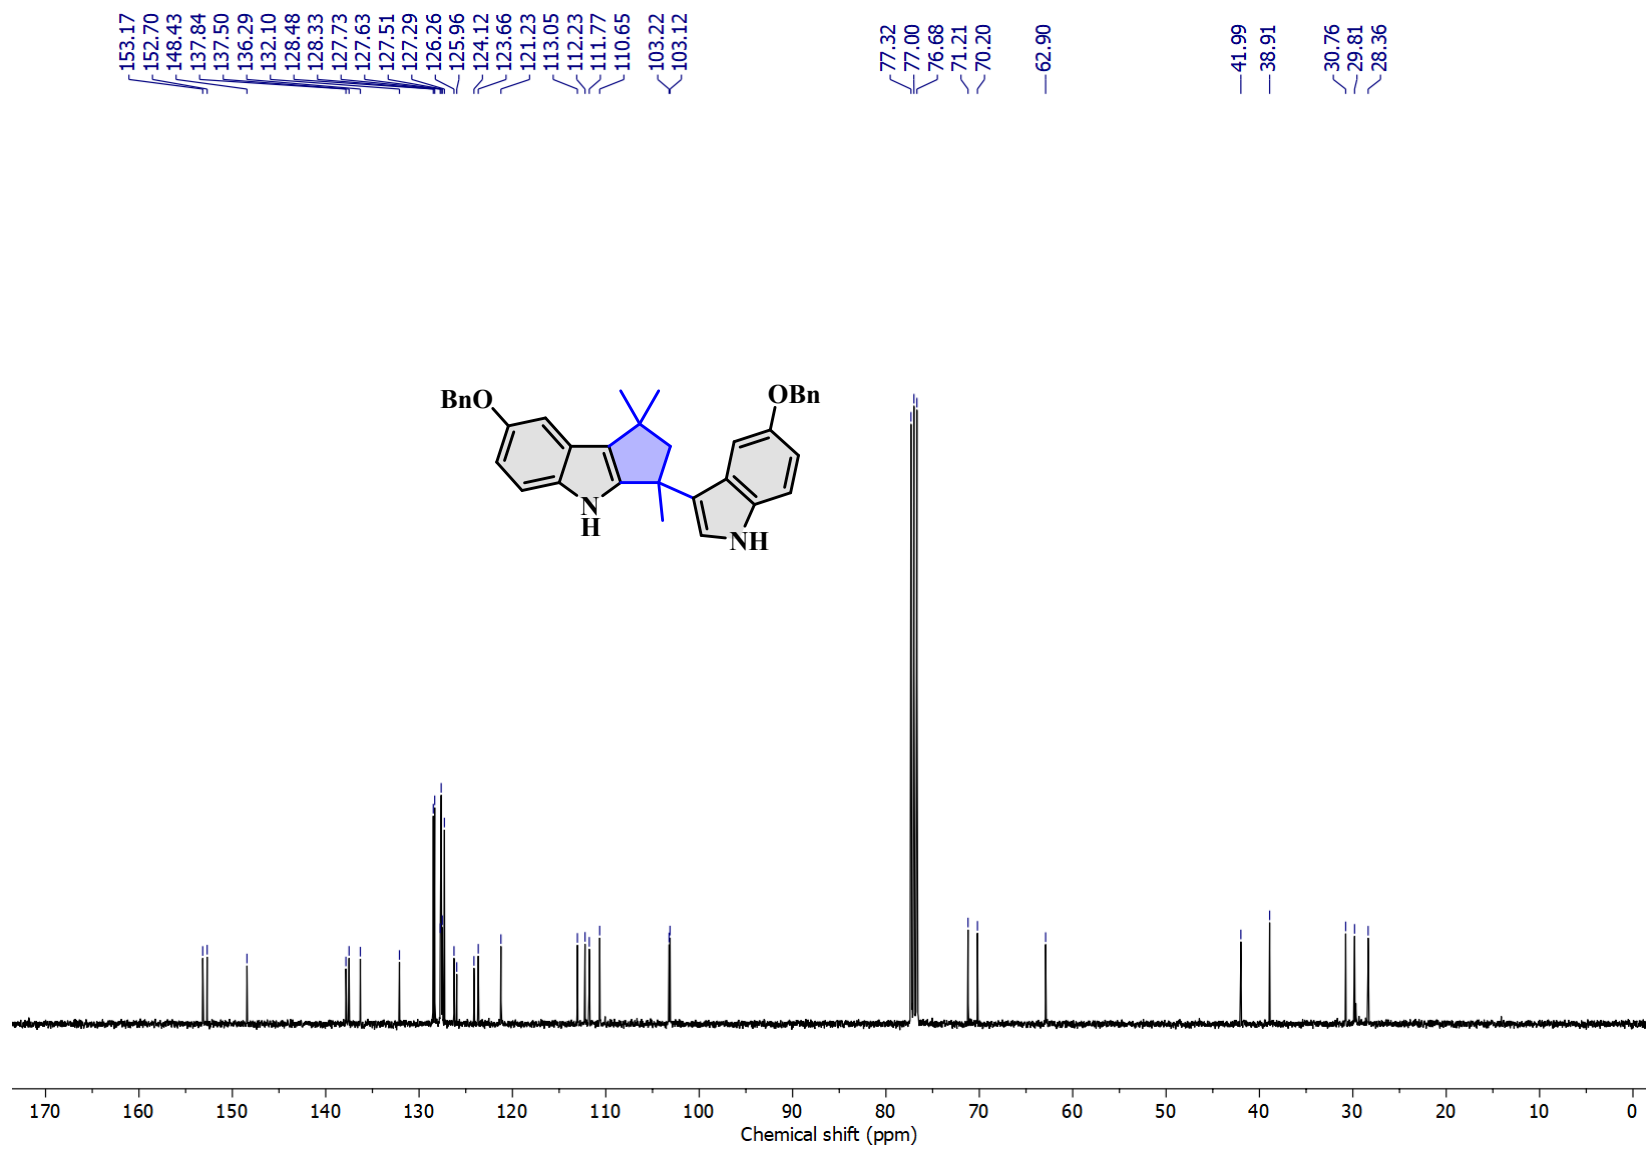

Fig. S32 100 MHz  $^{13}\text{C}$  NMR spectrum of **2p** in  $\text{CDCl}_3$

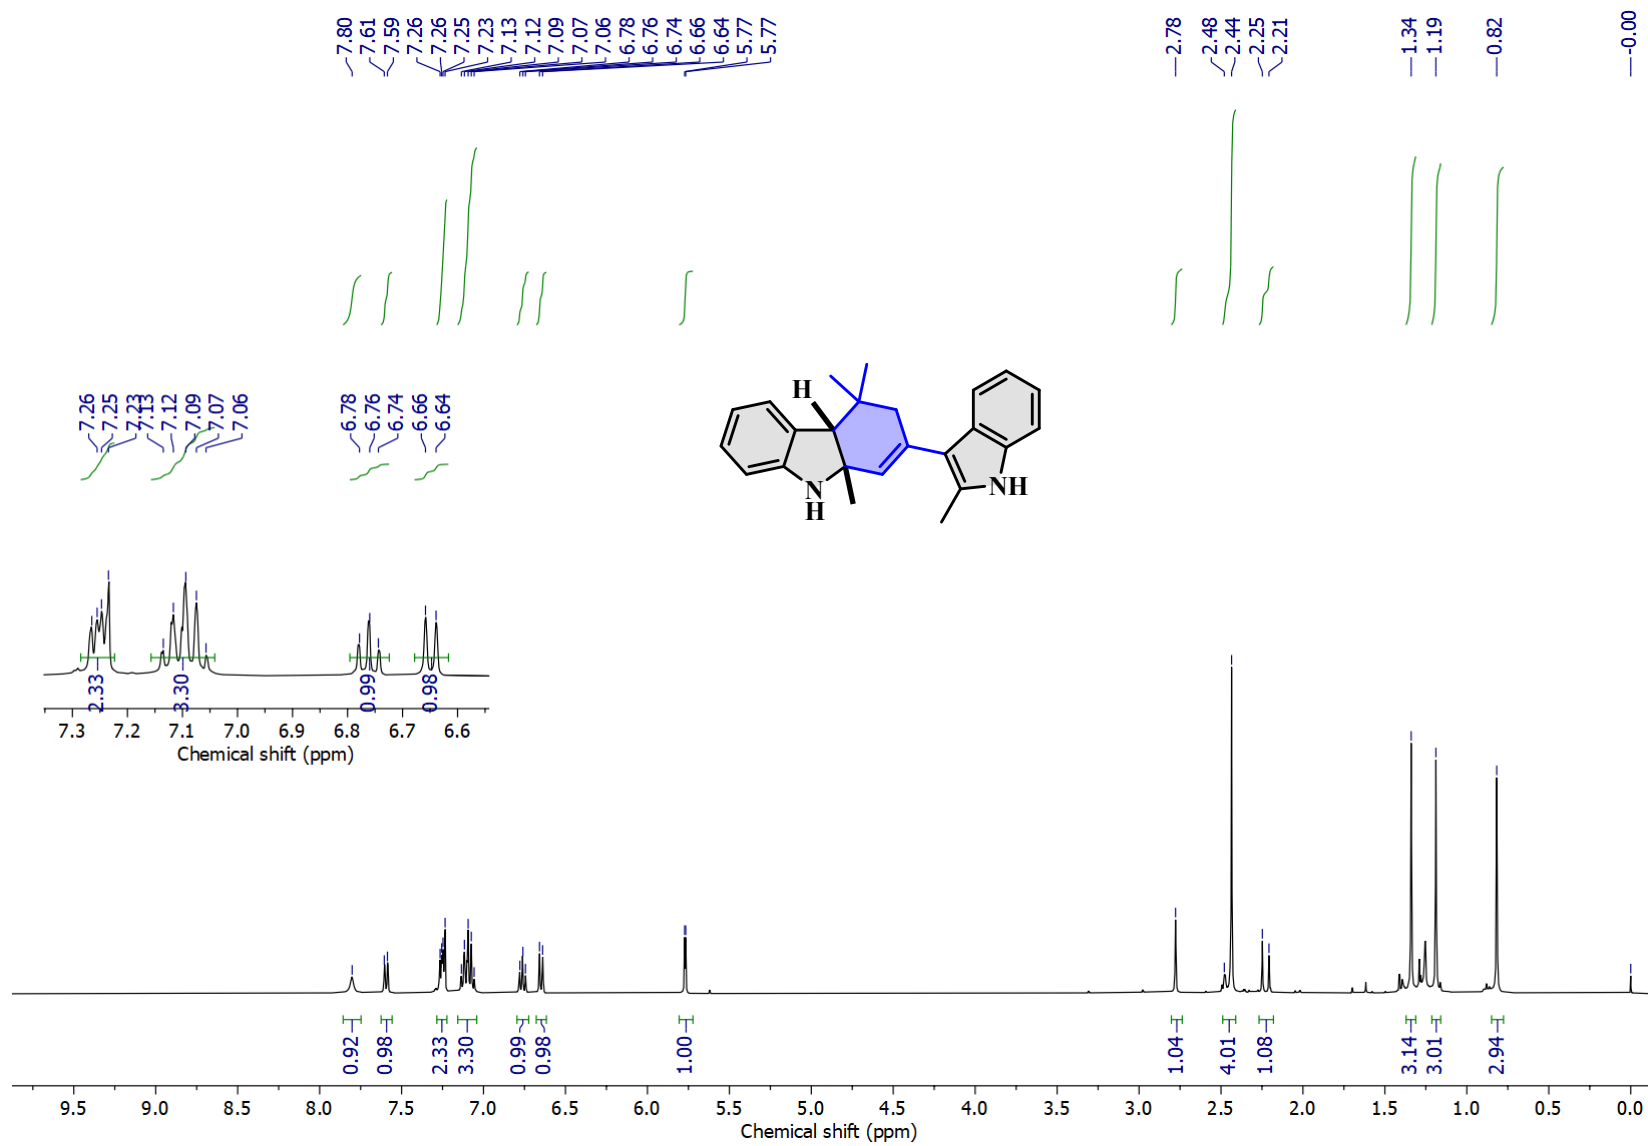

Fig. S33 400 MHz <sup>1</sup>H NMR spectrum of (2q)<sup>3</sup> in CDCl<sub>3</sub>

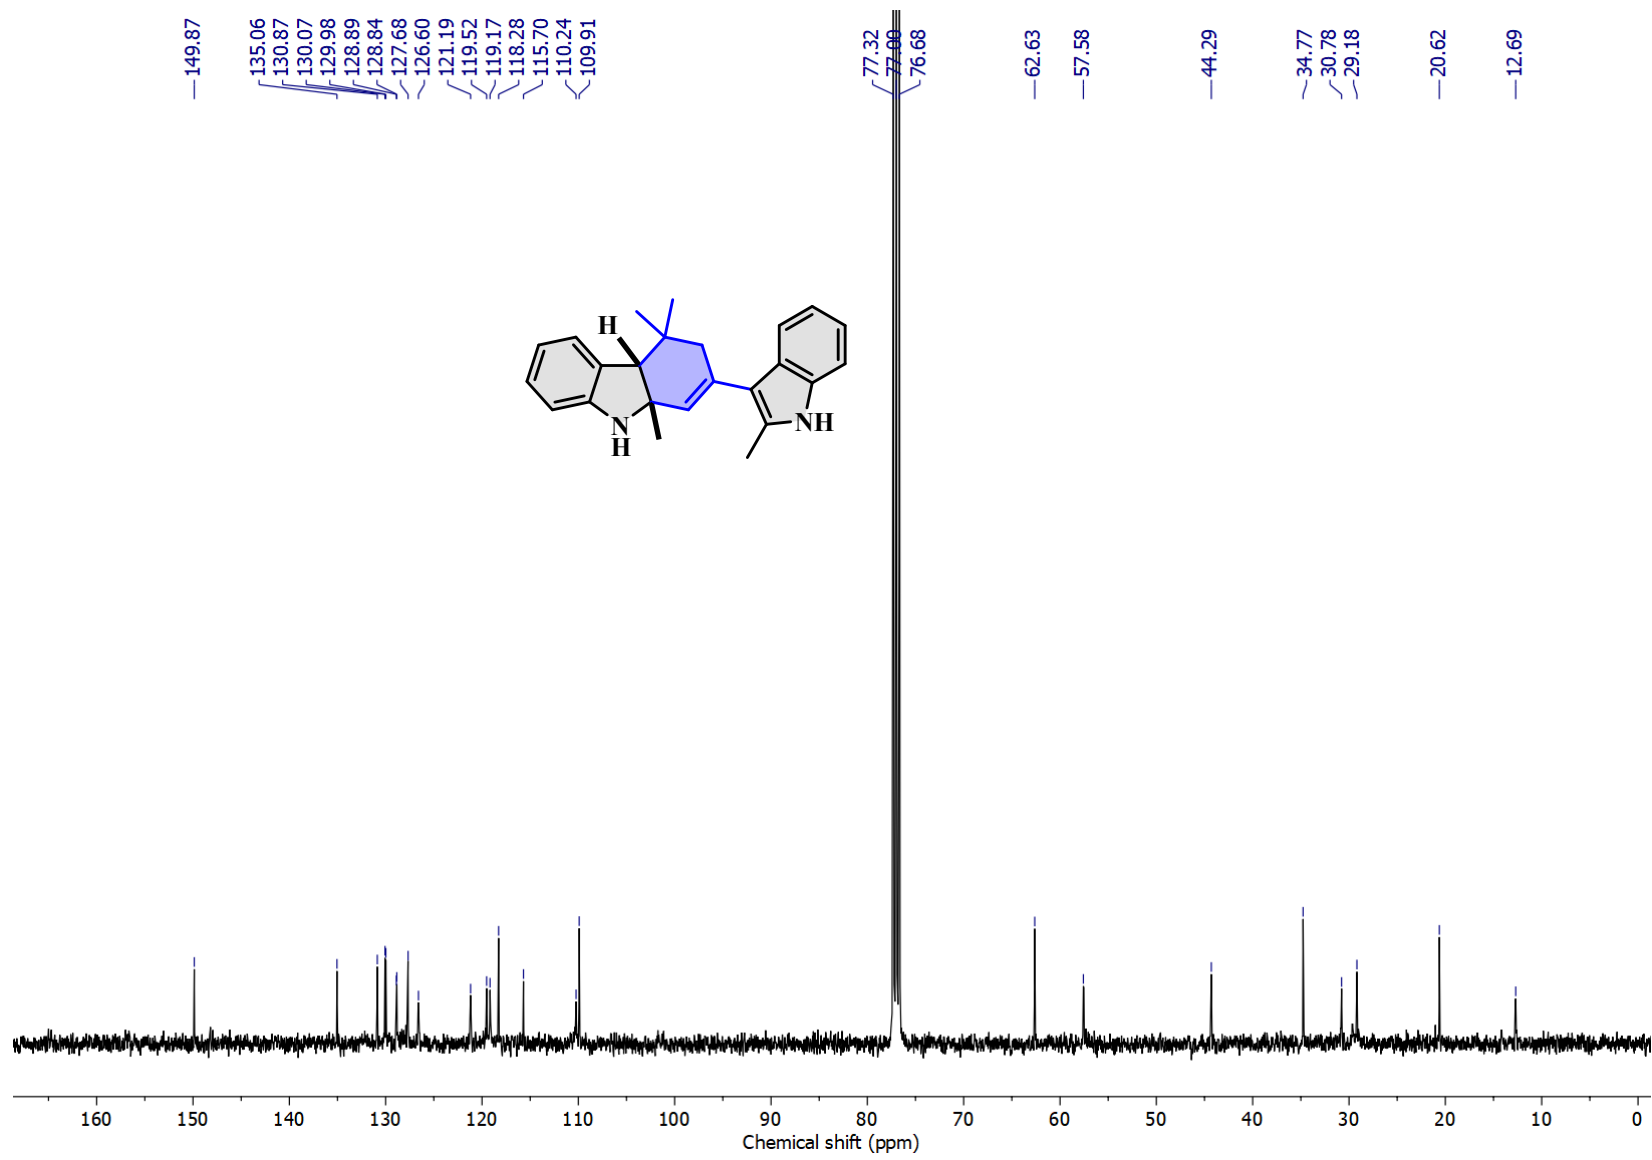

Fig. S34 100 MHz <sup>13</sup>C NMR spectrum of (2q)<sup>3</sup> in CDCl<sub>3</sub>

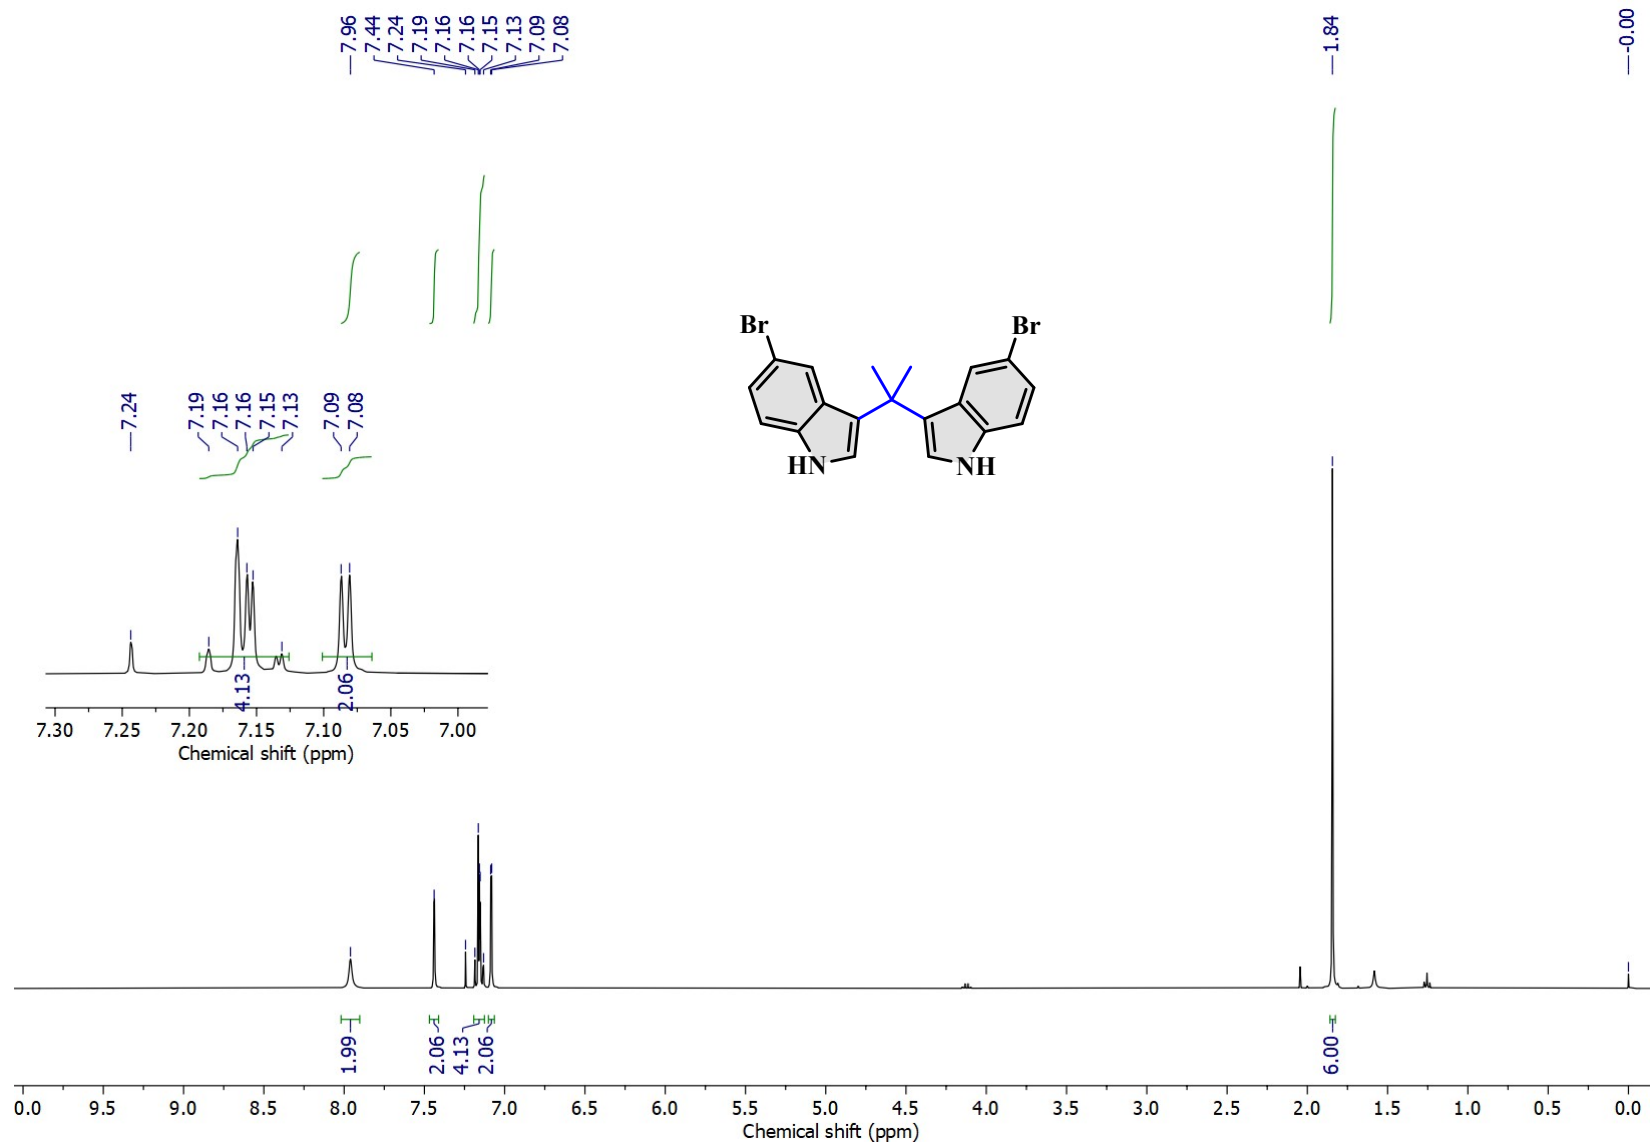

**Fig. S35** 400 MHz  $^1\text{H NMR}$  spectrum of  $(\mathbf{3a})_2$  in  $\text{CDCl}_3$

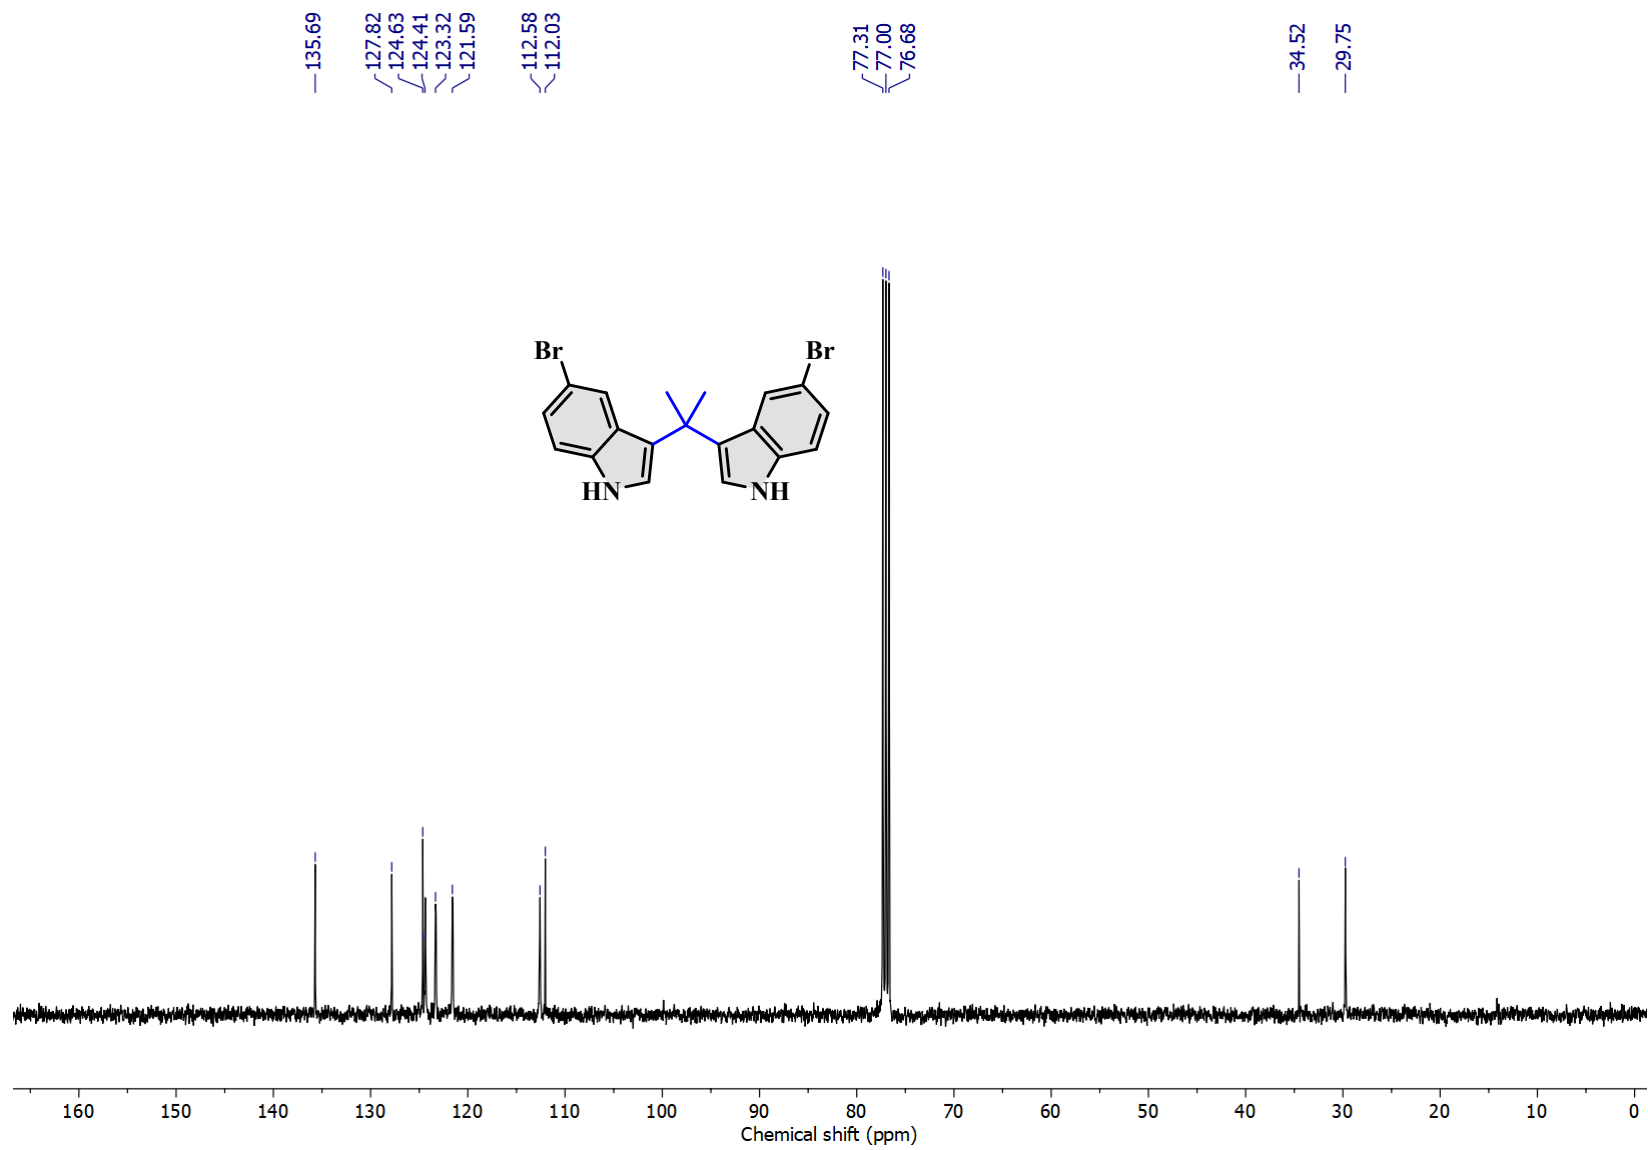

Fig. S36 100 MHz <sup>13</sup>C NMR spectrum of (3a)<sub>2</sub> in CDCl<sub>3</sub>

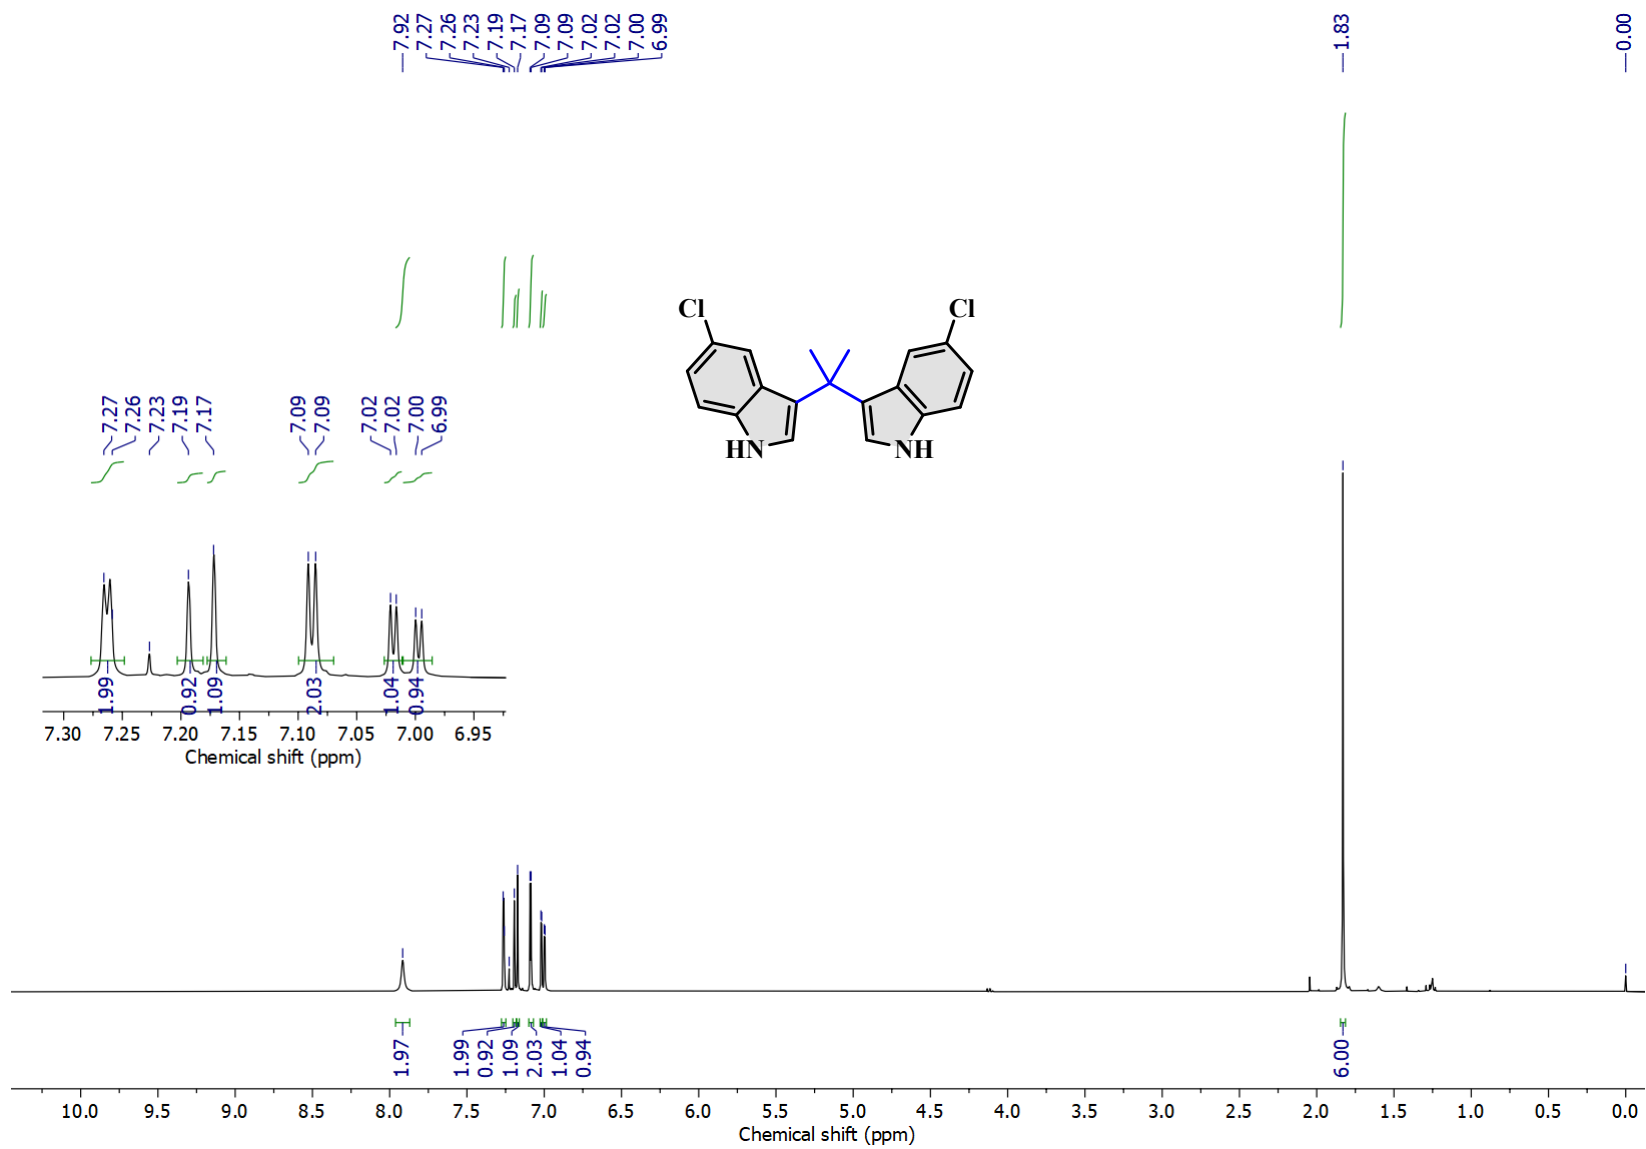

Fig. S37 400 MHz <sup>1</sup>H NMR spectrum of (3b)<sub>2</sub> in CDCl<sub>3</sub>

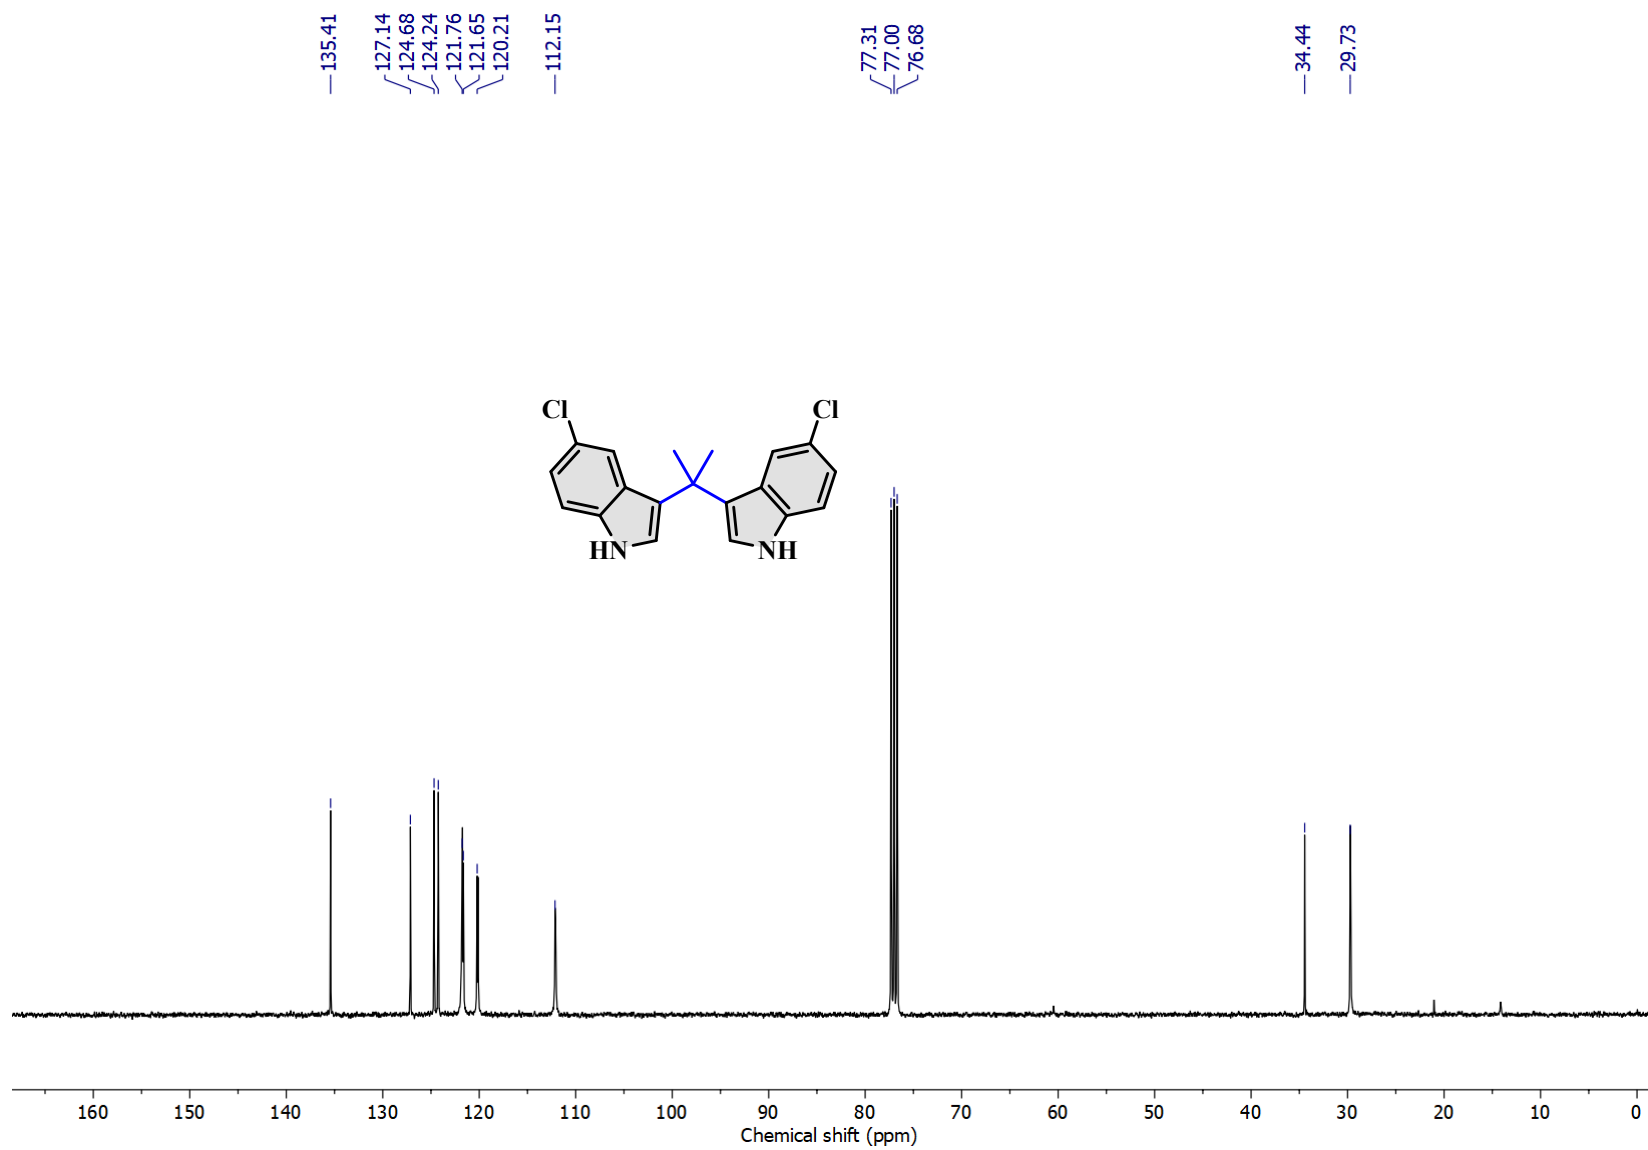

Fig. S38 100 MHz <sup>13</sup>C NMR spectrum of (3b)<sub>2</sub> in CDCl<sub>3</sub>

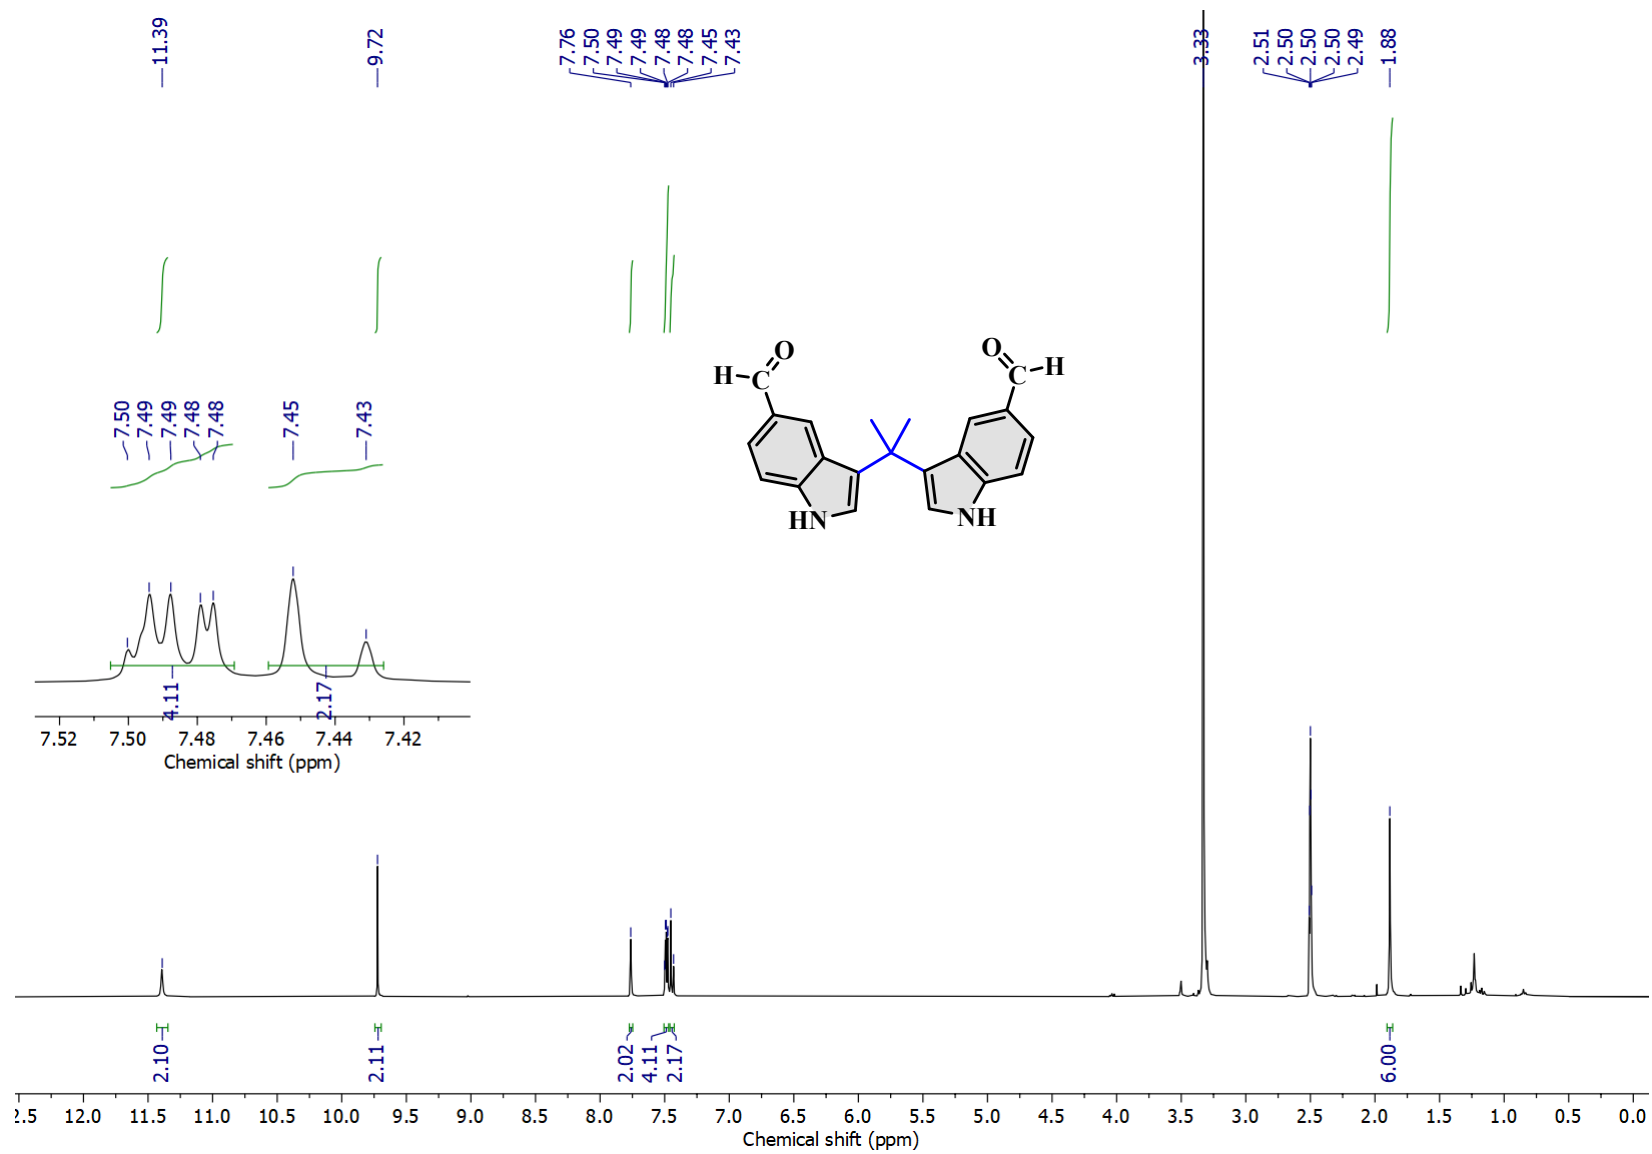

**Fig. S39** 400 MHz  $^1\text{H}$  NMR spectrum of **3c** in  $\text{DMSO-}d_6$



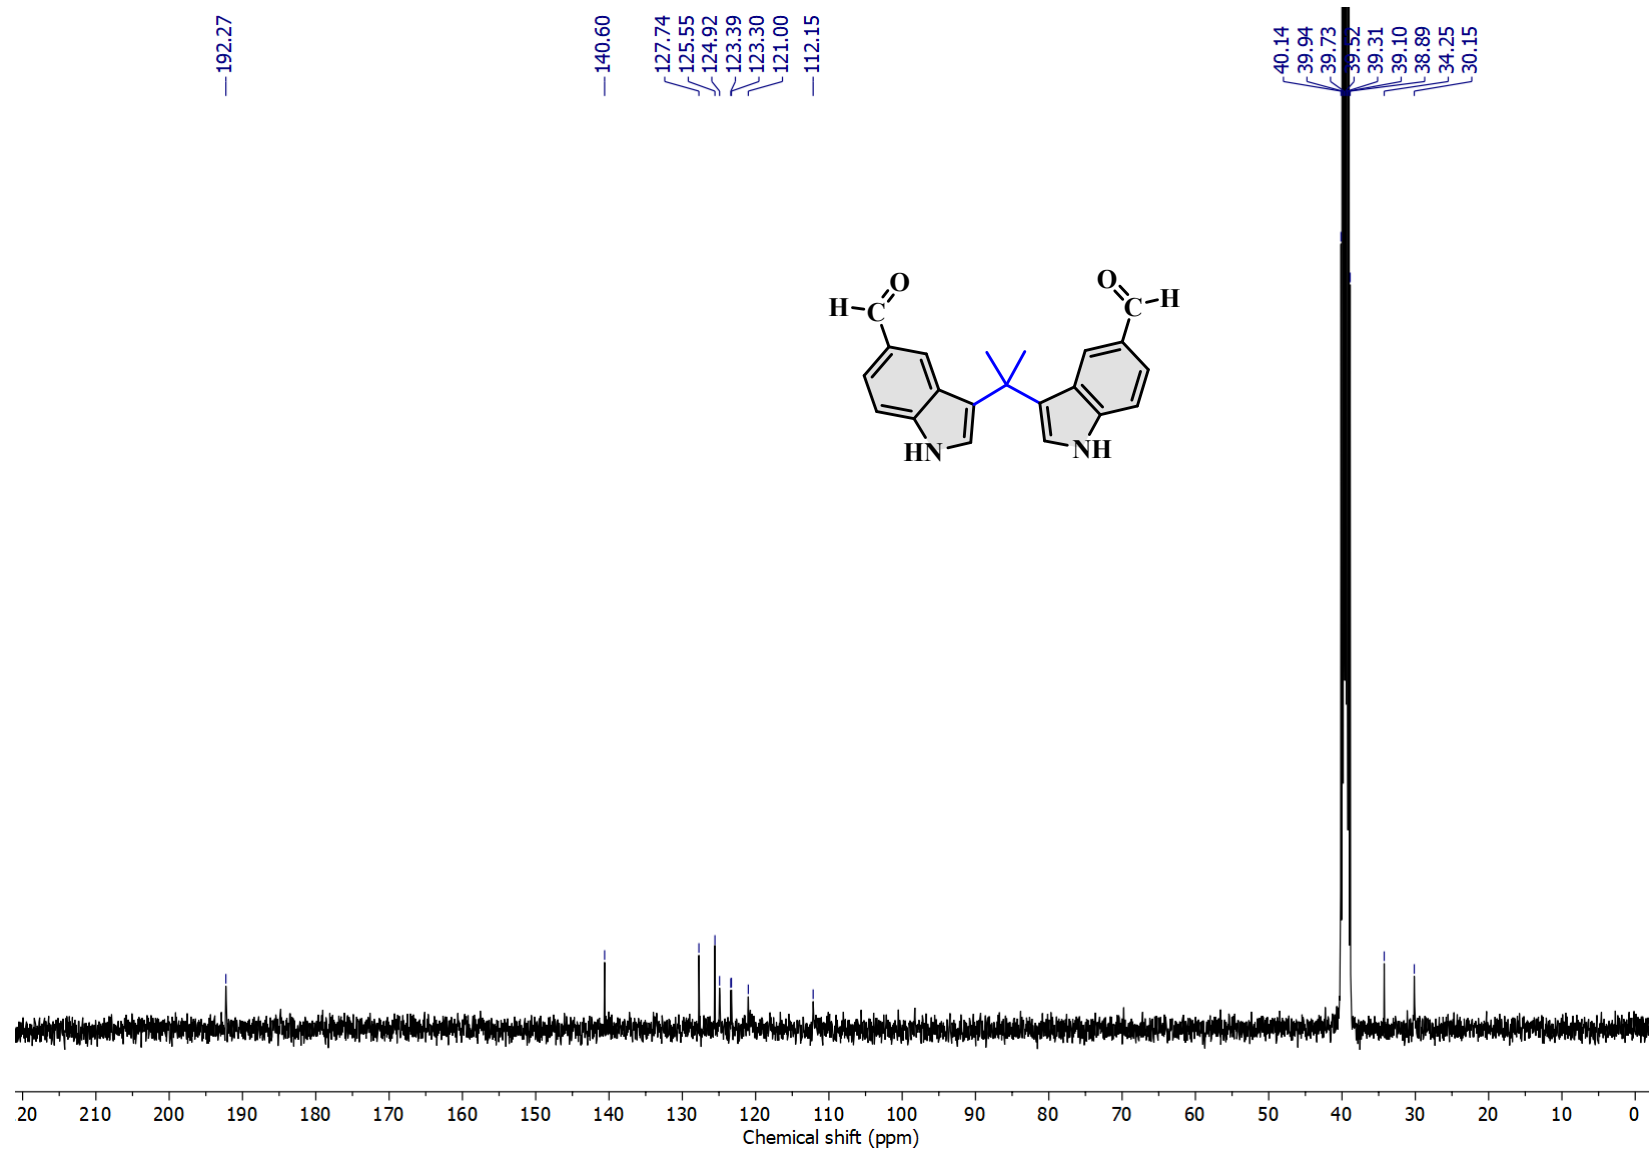

Fig. S40 100 MHz  $^{13}\text{C}$  NMR spectrum of **3c** in  $\text{DMSO-}d_6$

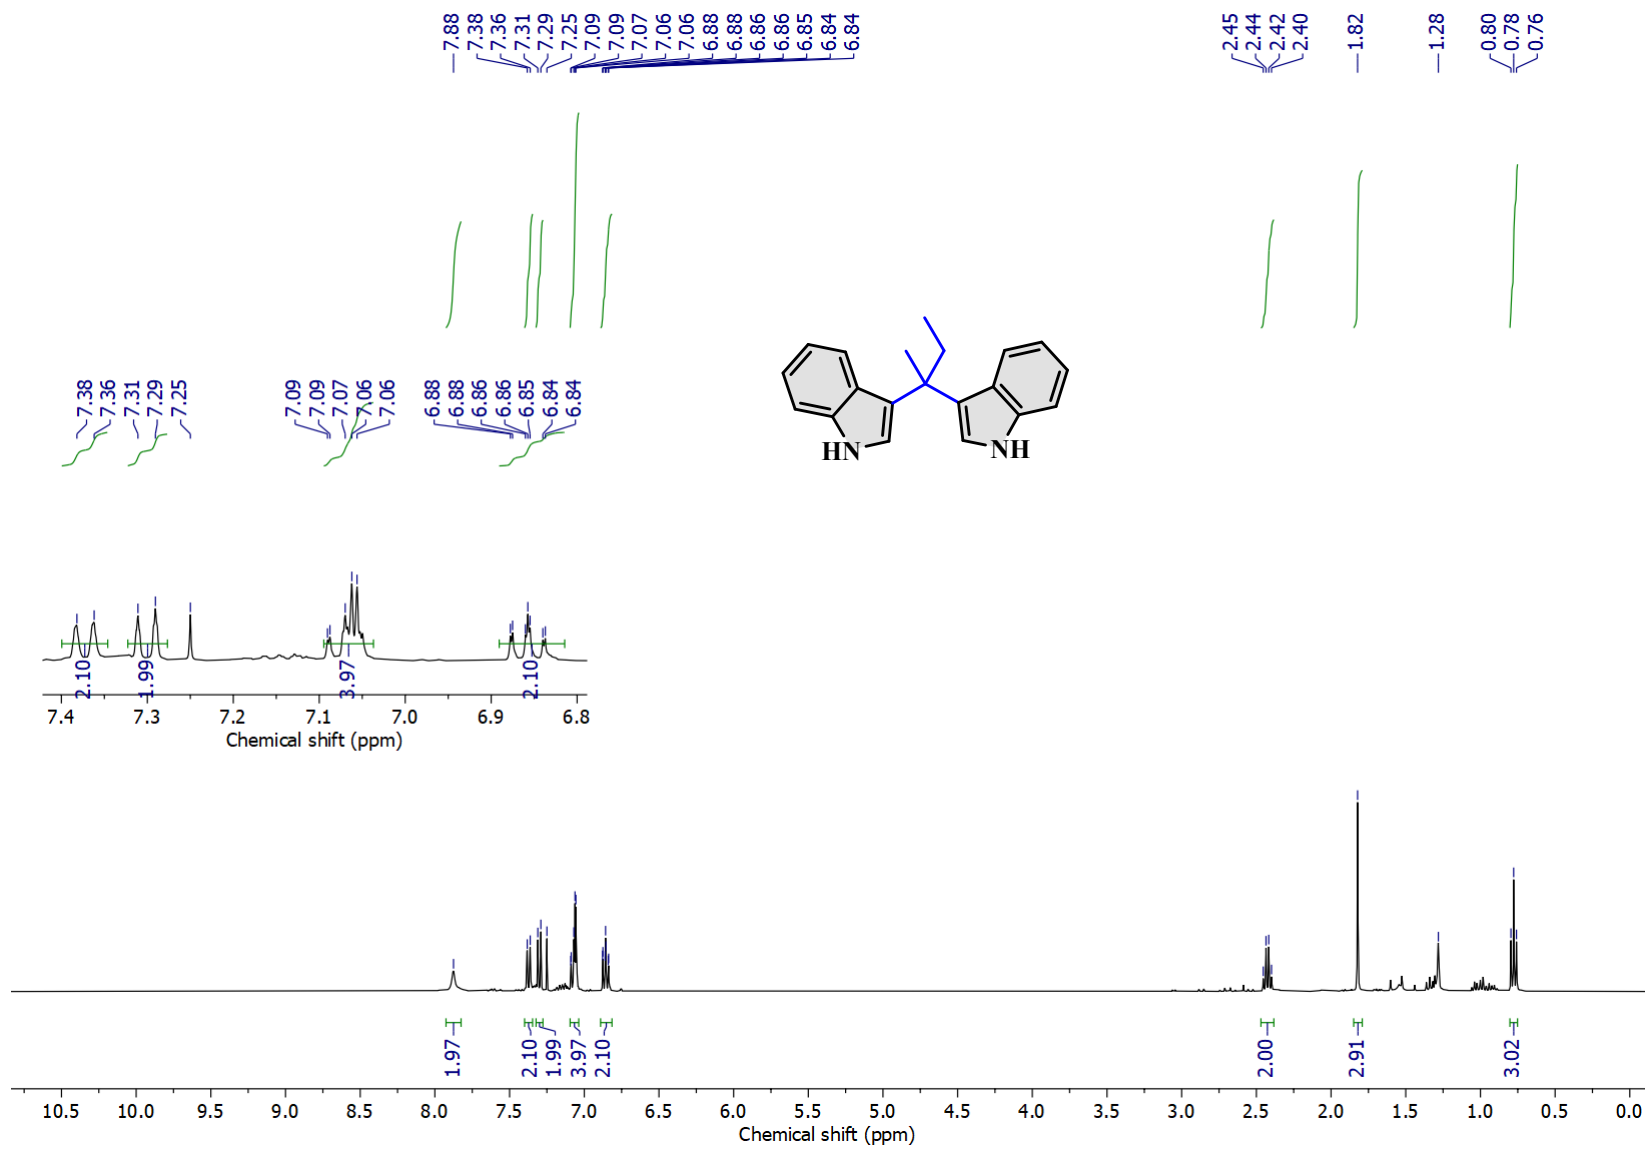

**Fig. S41** 400 MHz  $^1\text{H}$  NMR spectrum of **(3d)**<sup>4</sup> in  $\text{CDCl}_3$

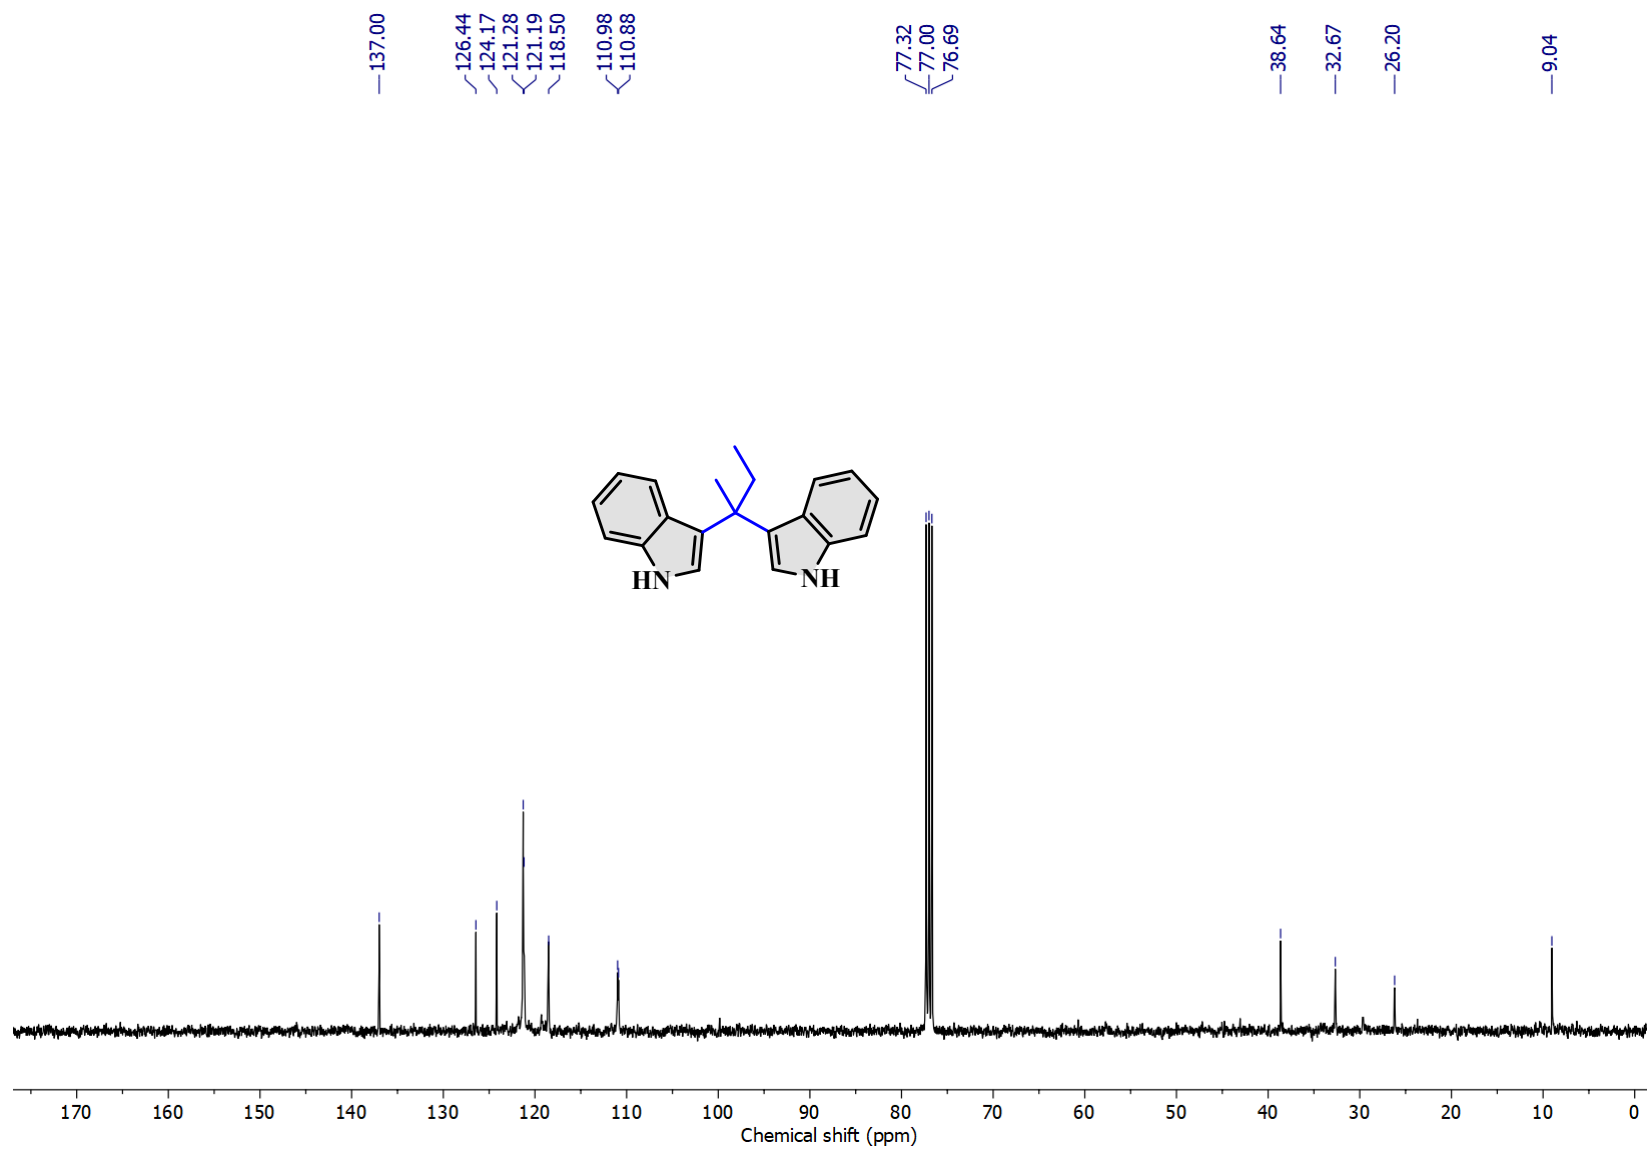

Fig. S42 100 MHz <sup>13</sup>C NMR spectrum of **(3d)<sup>4</sup>** in CDCl<sub>3</sub>

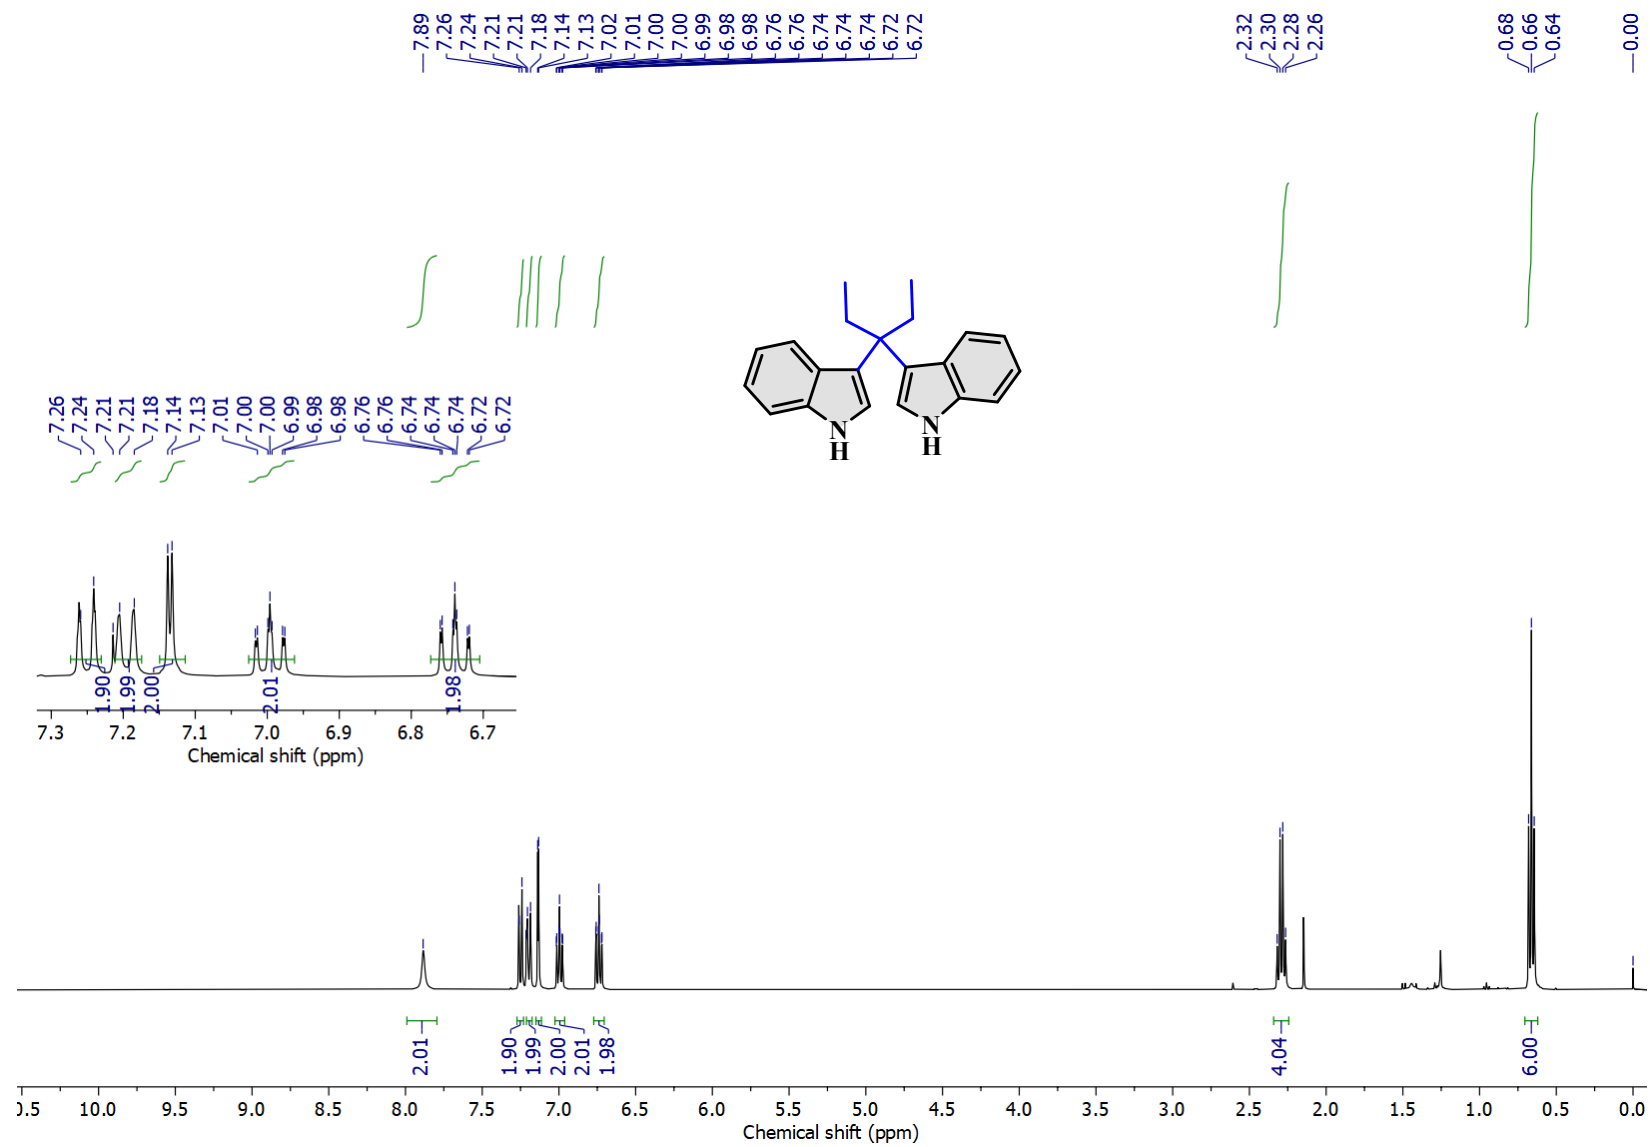

Fig. S43 400 MHz <sup>1</sup>H NMR spectrum of (3e)<sup>4</sup> in CDCl<sub>3</sub>

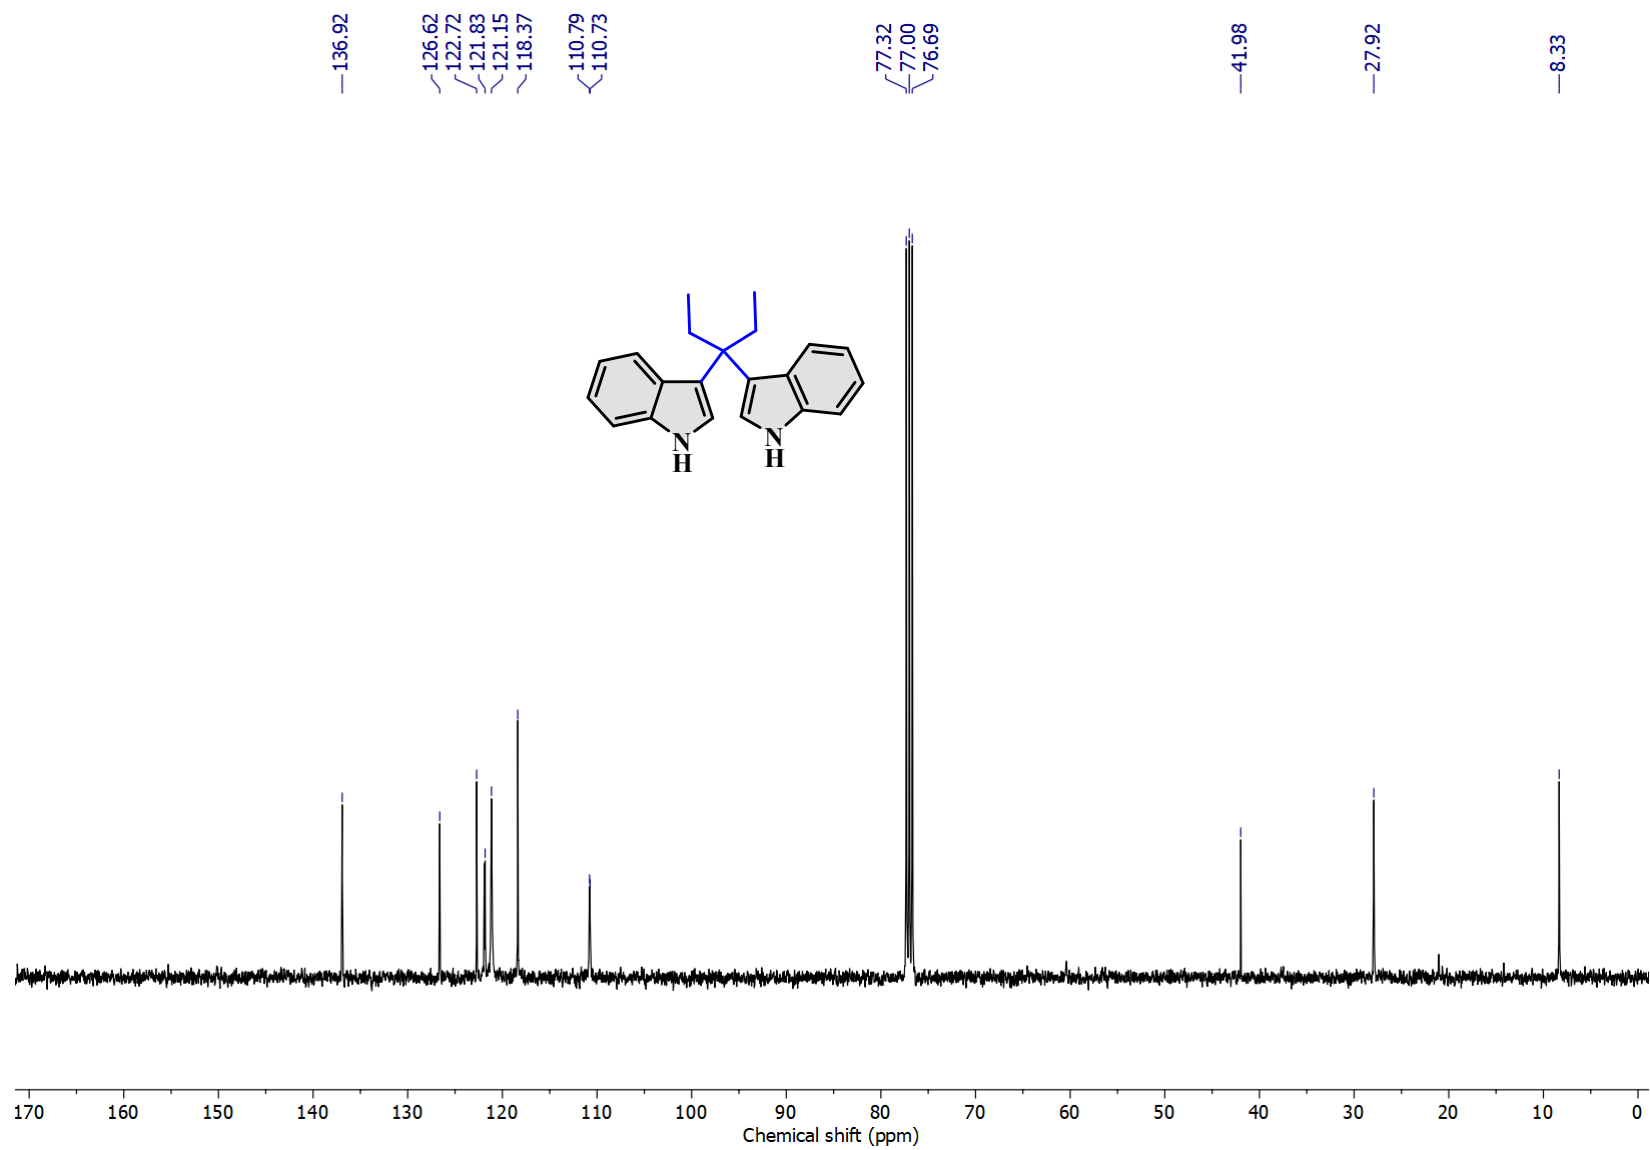

Fig. S44 100 MHz  $^{13}\text{C}$  NMR spectrum of **(3e)**<sup>4</sup> in  $\text{CDCl}_3$

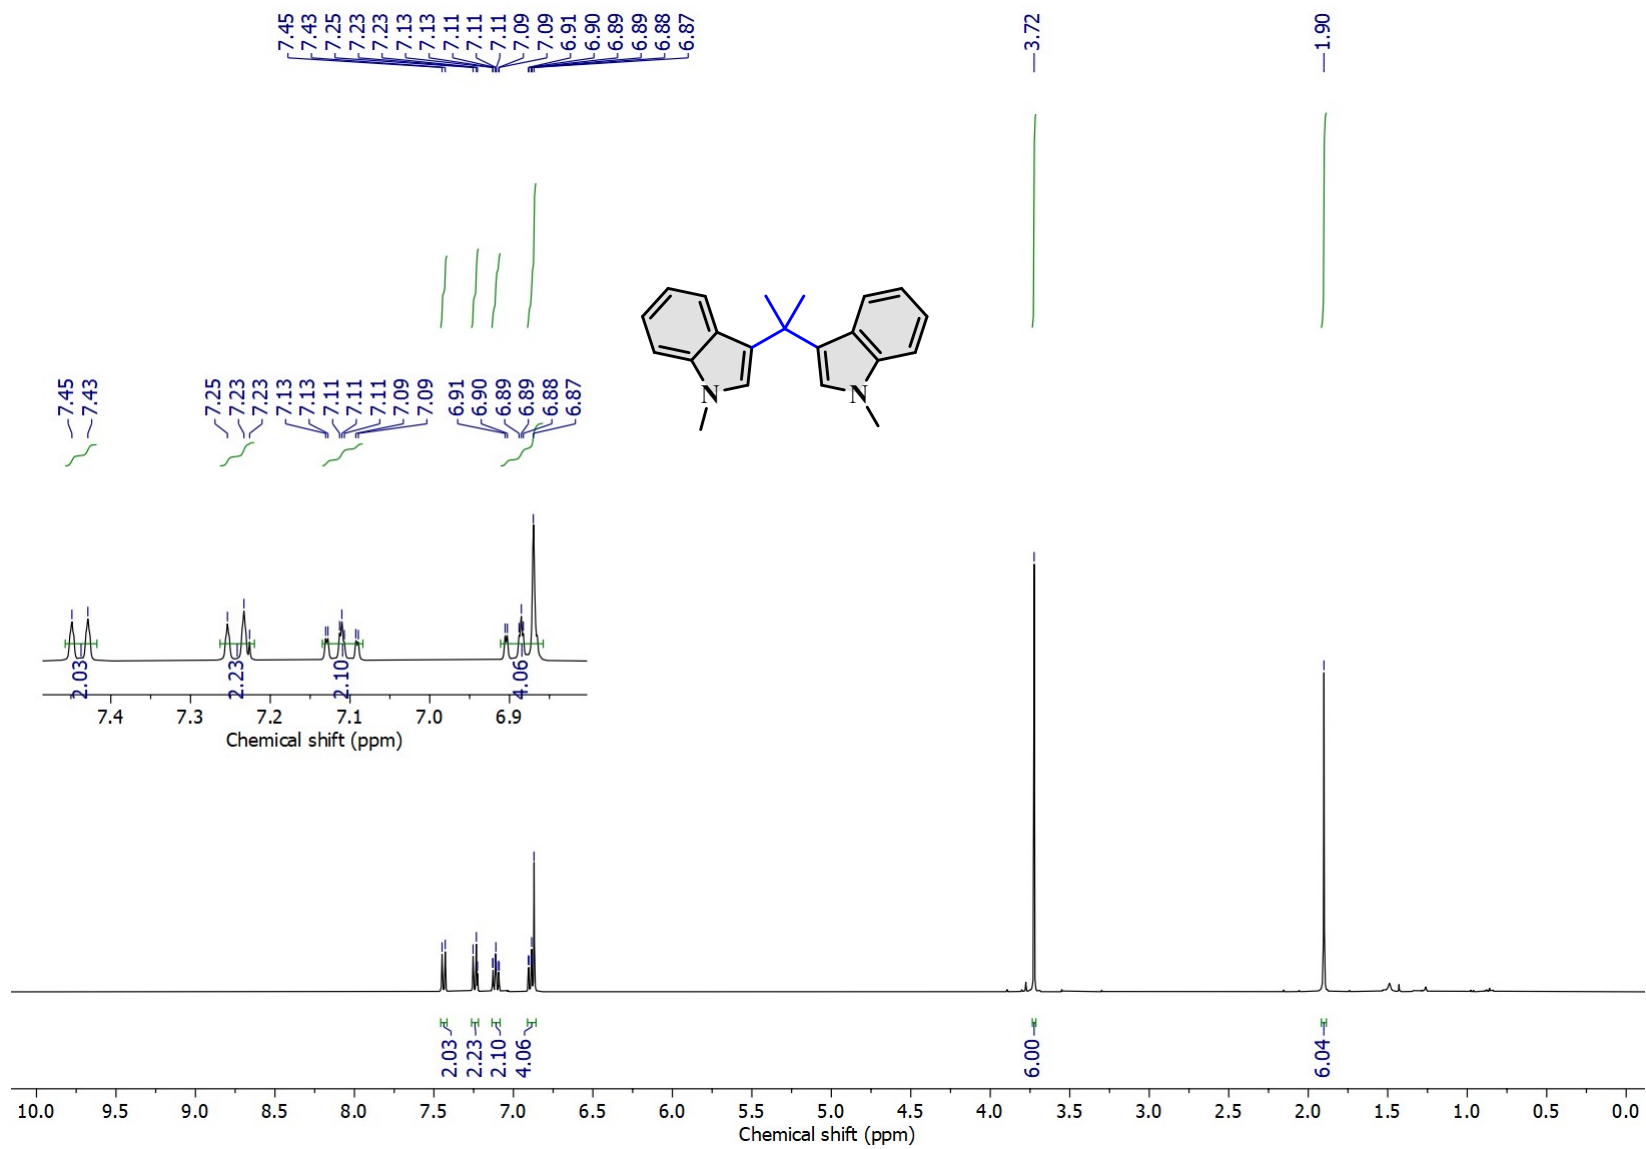

Fig. S45 400 MHz <sup>1</sup>H NMR spectrum of (3a')<sub>5</sub> in CDCl<sub>3</sub>

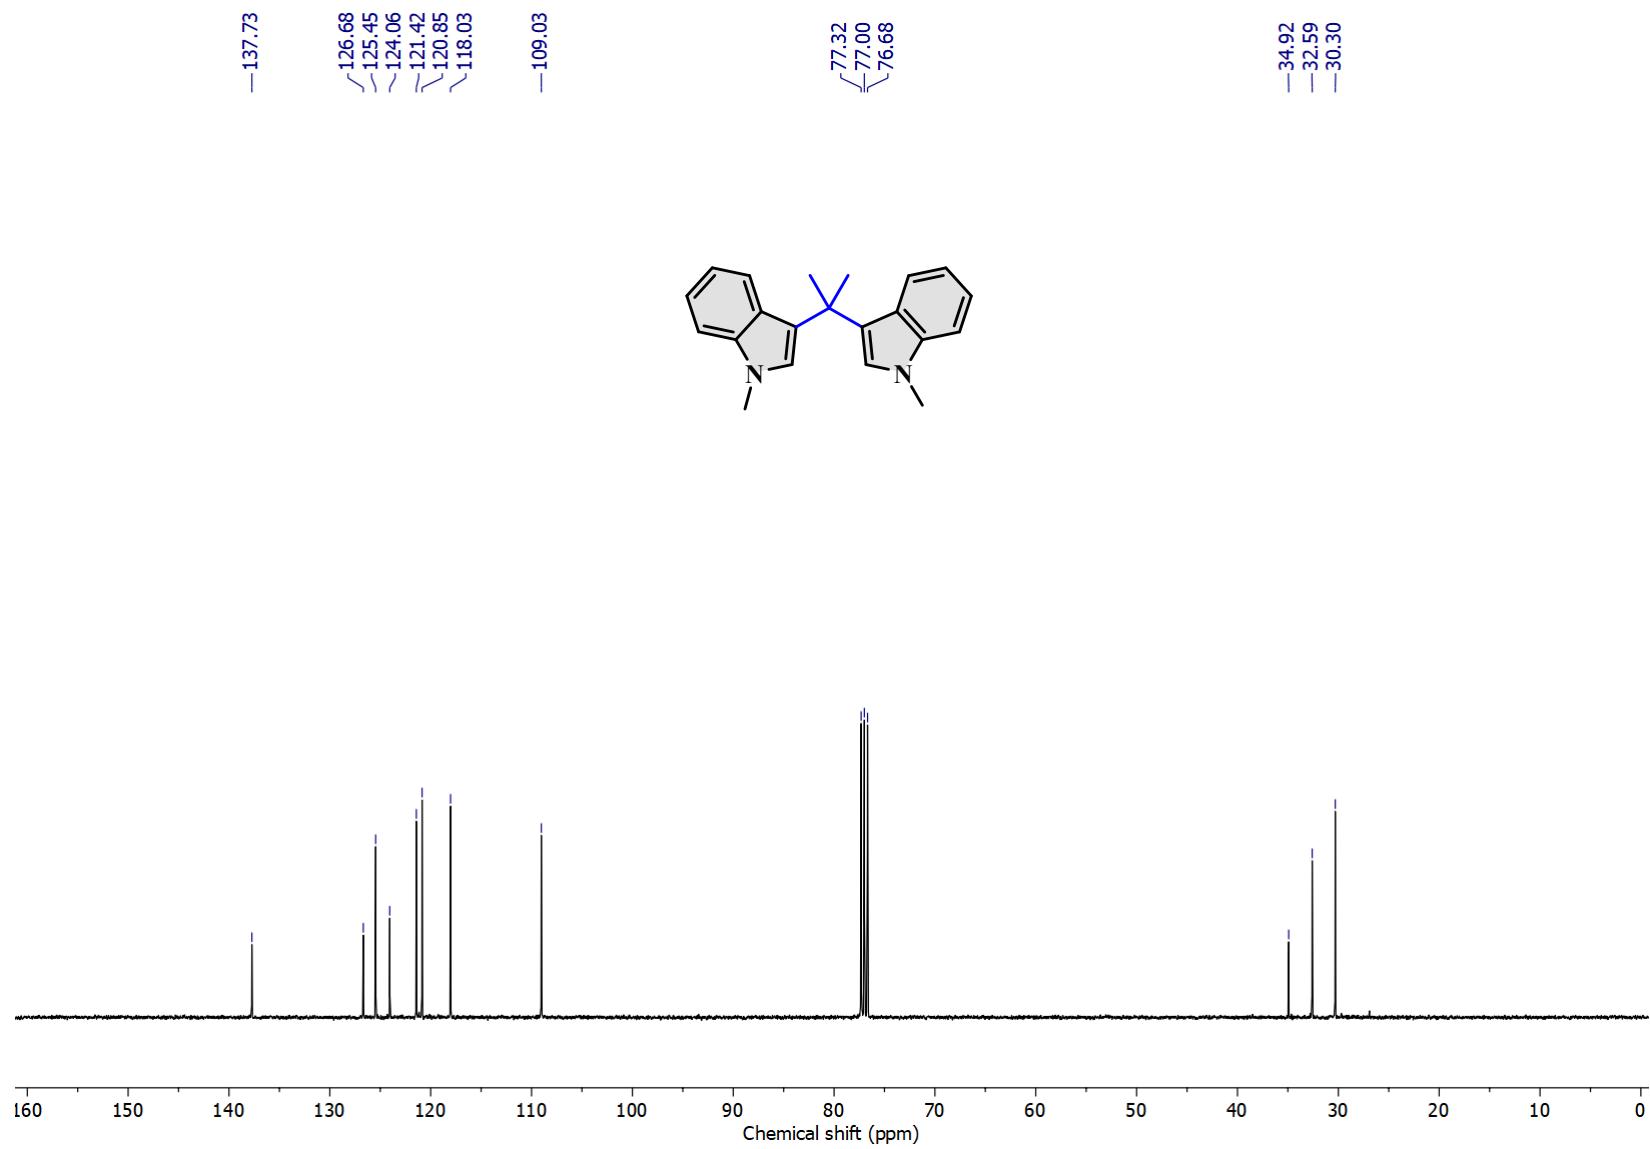

**Fig. S46** 100 MHz <sup>13</sup>C NMR spectrum of (3a')<sub>5</sub> in CDCl<sub>3</sub>

## 2. Copies of HRMS spectra

### Single Mass Analysis

Tolerance = 100.0 mDa / DBE: min = -1.5, max = 50.0

Element prediction: Off

Number of isotope peaks used for i-FIT = 3

Monoisotopic Mass, Even Electron Ions

893 formula(e) evaluated with 165 results within limits (all results (up to 1000) for each mass)

Elements Used:

| Mass     | Calc. Mass | mDa  | PPM  | DBE  | Formula                                                       | i-FIT | i-FIT Norm | Fit Conf % | C  | H  | N  | O |
|----------|------------|------|------|------|---------------------------------------------------------------|-------|------------|------------|----|----|----|---|
| 375.2078 | 375.2078   | 0.0  | 0.0  | 5.5  | C <sub>9</sub> H <sub>23</sub> N <sub>14</sub> O <sub>3</sub> | 750.0 | 3.073      | 4.63       | 9  | 23 | 14 | 3 |
| 375.2073 | 375.2073   | 0.5  | 1.3  | 12.5 | C <sub>24</sub> H <sub>27</sub> N <sub>2</sub> O <sub>2</sub> | 755.1 | 8.181      | 0.03       | 24 | 27 | 2  | 2 |
| 375.2091 | 375.2091   | -1.3 | -3.5 | -0.5 | C <sub>12</sub> H <sub>31</sub> N <sub>4</sub> O <sub>9</sub> | 752.7 | 5.768      | 0.31       | 12 | 31 | 4  | 9 |
| 375.2064 | 375.2064   | 1.4  | 3.7  | 0.5  | C <sub>8</sub> H <sub>27</sub> N <sub>10</sub> O <sub>7</sub> | 751.6 | 4.697      | 0.91       | 8  | 27 | 10 | 7 |
| 375.2104 | 375.2104   | -2.6 | -6.9 | 4.5  | C <sub>13</sub> H <sub>27</sub> N <sub>8</sub> O <sub>5</sub> | 752.1 | 5.199      | 0.55       | 13 | 27 | 8  | 5 |
| 375.2046 | 375.2046   | 3.2  | 8.5  | 13.5 | C <sub>20</sub> H <sub>23</sub> N <sub>8</sub>                | 753.6 | 6.678      | 0.13       | 20 | 23 | 8  |   |

28122020\_087\_8244

PB-456\_28122020\_004 408 (3.554)AM2 (Ar,30000,0.556,29,0.00,LS 1); Cm (376.429)

1: TOF MS ES+  
1.24e+008

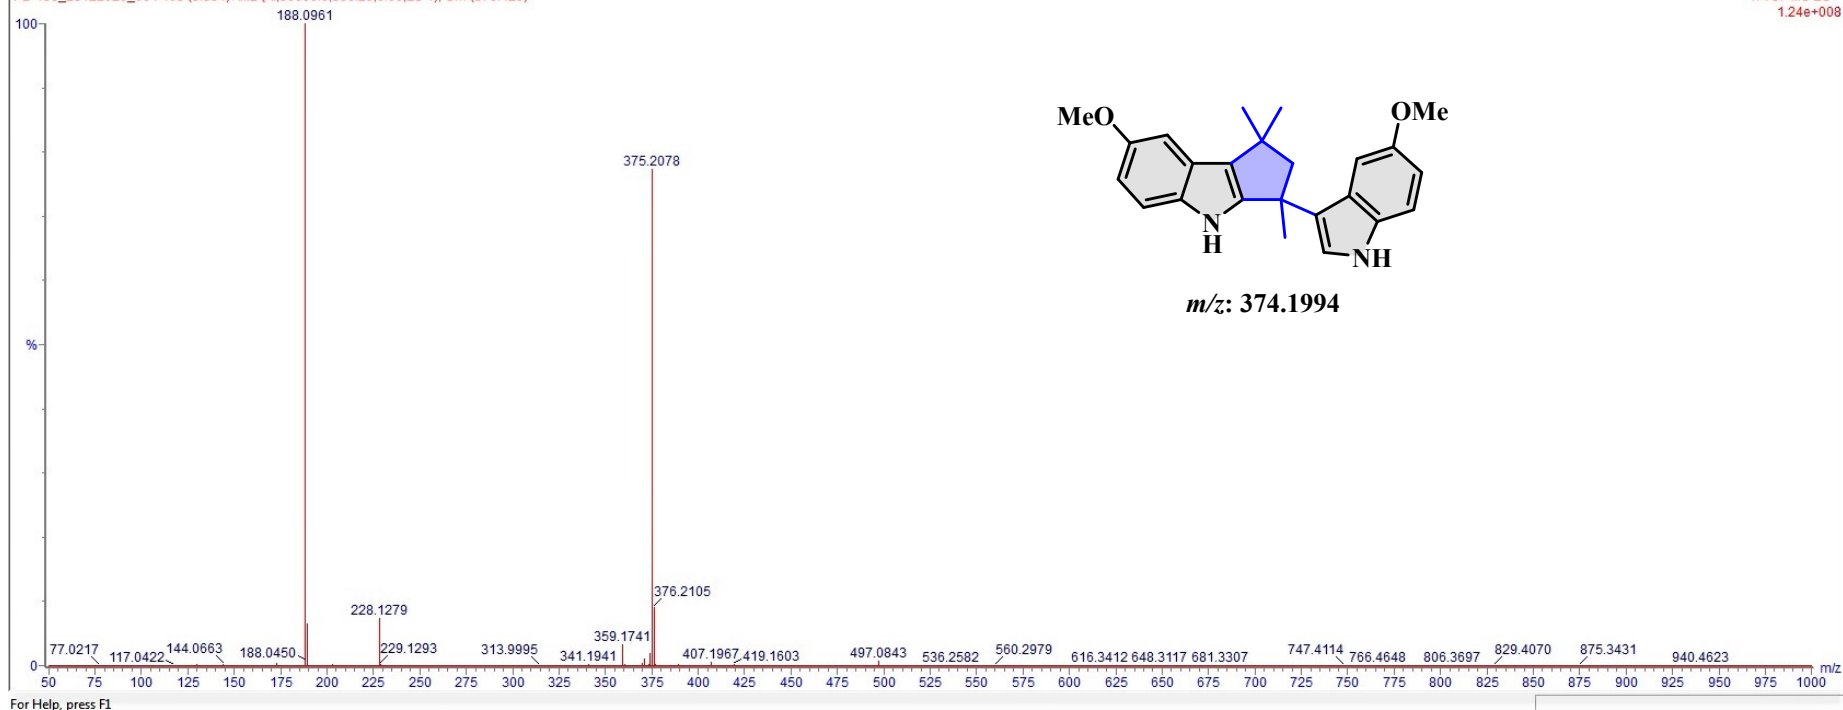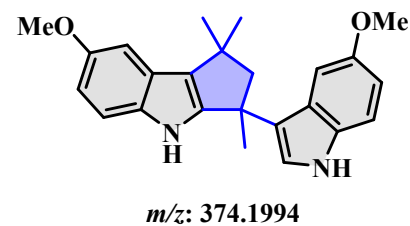

Fig. S47 HRMS spectrum of 2c



### Single Mass Analysis

Tolerance = 100.0 mDa / DBE: min = -1.5, max = 50.0

Element prediction: Off

Number of isotope peaks used for i-FIT = 3

Monoisotopic Mass, Even Electron Ions

1033 formula(e) evaluated with 165 results within limits (all results (up to 1000) for each mass)

Elements Used:

| Mass     | Calc. Mass | mDa  | PPM  | DBE  | Formula        | i-FIT | i-FIT Norm | Fit Conf % | C  | H  | N  | O |
|----------|------------|------|------|------|----------------|-------|------------|------------|----|----|----|---|
| 403.2385 | 403.2386   | -0.1 | -0.2 | 12.5 | C26 H31 N2 O2  | 700.0 | 8.010      | 0.03       | 26 | 31 | 2  | 2 |
|          | 403.2391   | -0.6 | -1.5 | 5.5  | C11 H27 N14 O3 | 695.2 | 3.185      | 4.14       | 11 | 27 | 14 | 3 |
|          | 403.2377   | 0.8  | 2.0  | 0.5  | C10 H31 N10 O7 | 696.4 | 4.379      | 1.25       | 10 | 31 | 10 | 7 |
|          | 403.2404   | -1.9 | -4.7 | -0.5 | C14 H35 N4 O9  | 697.8 | 5.866      | 0.28       | 14 | 35 | 4  | 9 |
|          | 403.2359   | 2.6  | 6.4  | 13.5 | C22 H27 N8     | 698.8 | 6.787      | 0.11       | 22 | 27 | 8  |   |
|          | 403.2417   | -3.2 | -7.9 | 4.5  | C15 H31 N8 O5  | 697.4 | 5.381      | 0.46       | 15 | 31 | 8  | 5 |

28122020\_087\_8246

PB-465\_28122020\_007\_454 (3.949) AM2 (Ar,30000.0,556.32,0.00,LS 1); Cm (444:483)

1: TOF MS ES+  
1.01e+008

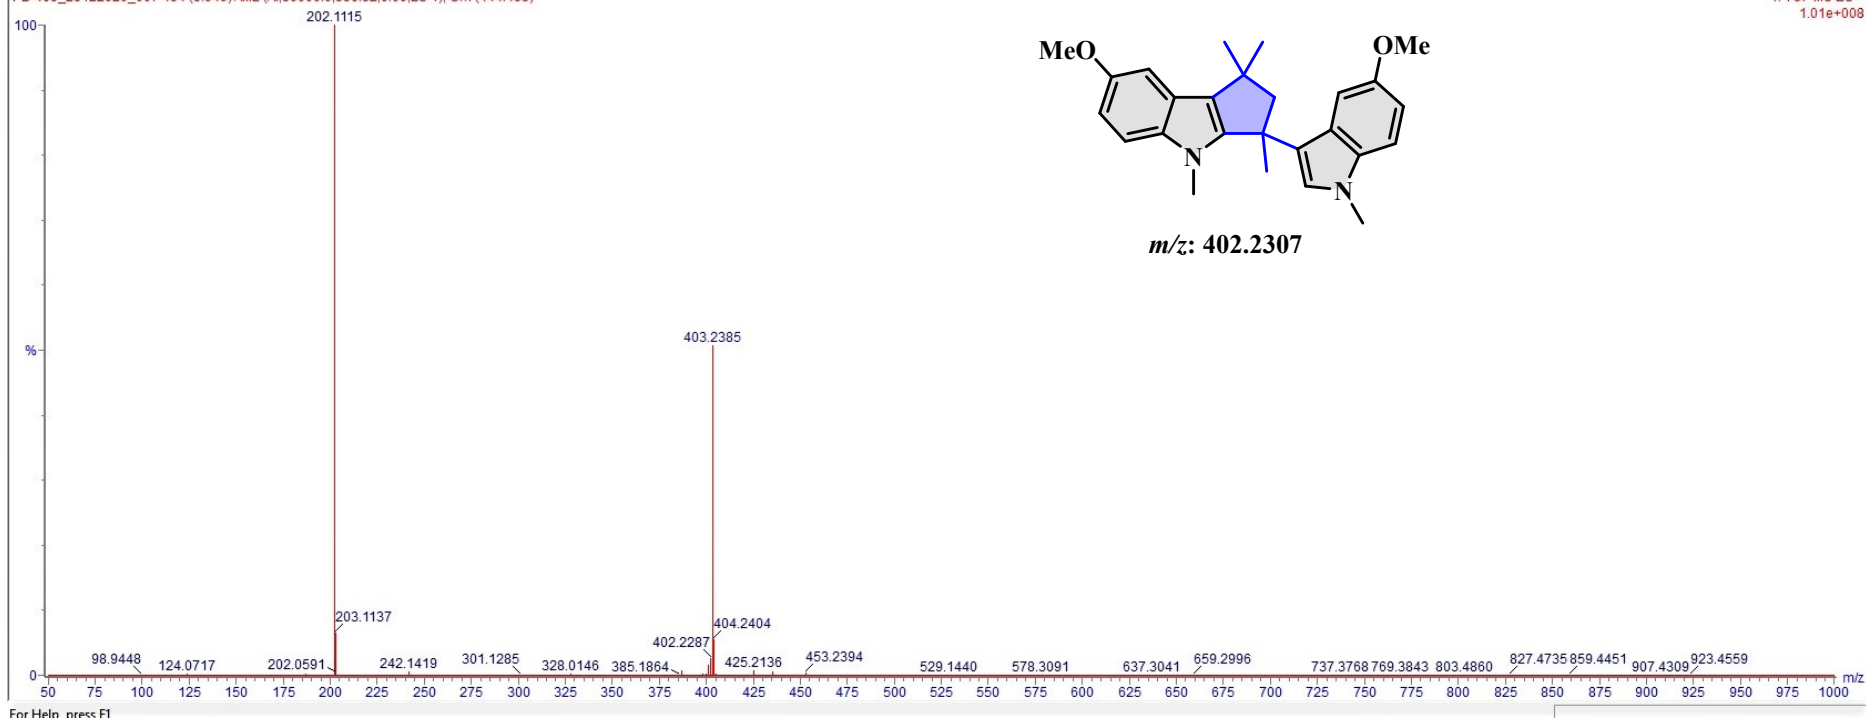

Fig. S48 HRMS spectrum of 2d

### 3. Single crystal XRD data of 2d

(CCDC 2254620)

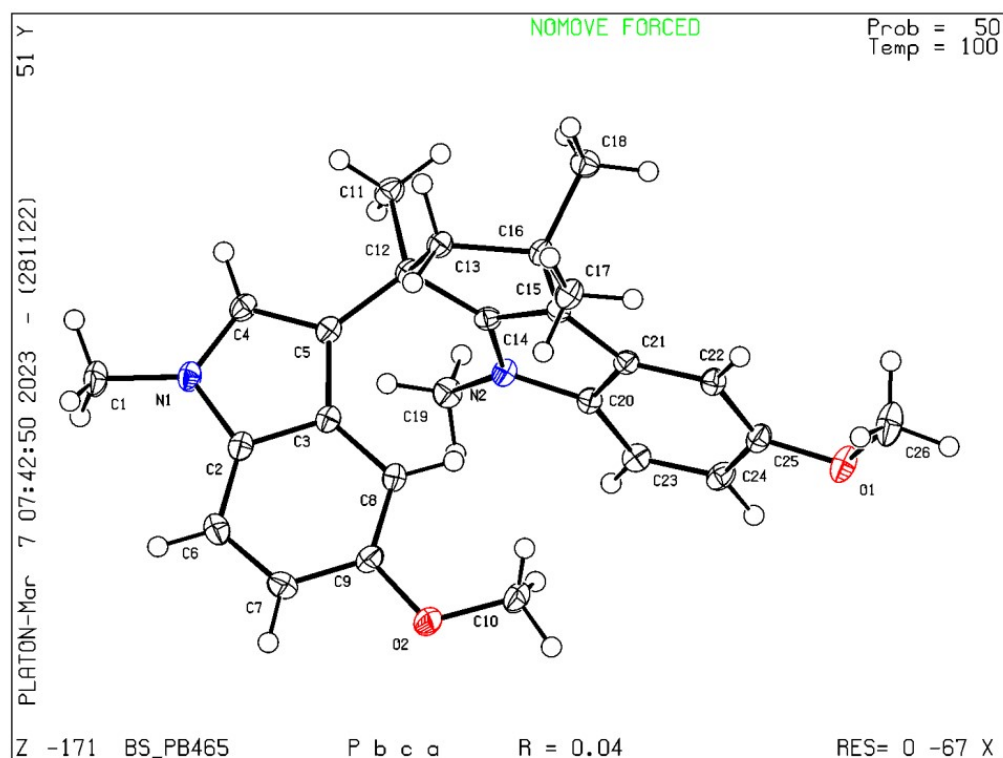

**Fig. S49** ORTEP diagram of **2d** with 50% probability ellipsoids

**Table S1** Crystallographic parameters of structures **2d**

| Crystal data                          | <b>2d</b>                                                     |
|---------------------------------------|---------------------------------------------------------------|
| Formula unit                          | C <sub>26</sub> H <sub>30</sub> N <sub>2</sub> O <sub>2</sub> |
| Formula weight (g mol <sup>-1</sup> ) | 402.52                                                        |
| Crystal system                        | orthorhombic                                                  |
| T [K]                                 | 100 K                                                         |
| <i>a</i> [Å]                          | 8.0818(7)                                                     |
| <i>b</i> [Å]                          | 16.4868(15)                                                   |
| <i>c</i> [Å]                          | 32.475(3)                                                     |
| $\alpha$ [°]                          | 90                                                            |
| $\beta$ [°]                           | 90                                                            |
| $\gamma$ [°]                          | 90                                                            |
| Volume [Å <sup>3</sup> ]              | 4327.1(7)                                                     |
| Space group                           | <i>Pbca</i>                                                   |
| Z                                     | 8                                                             |
| D <sub>cal</sub> [g/cm <sup>3</sup> ] | 1.236                                                         |
| R <sub>1</sub> , wR <sub>2</sub>      | 0.0429, 0.0941                                                |
| Instrument                            | Bruker CCD Apex II                                            |
| CCDC No                               | CCDC 2254620                                                  |

**Single crystal X-ray diffraction.** Single crystal X-ray diffractions were collected on a Bruker SMART APEX-II CCD diffractometer using Mo K $\alpha$  ( $\lambda = 0.71073 \text{ \AA}$ ) radiation. Bruker SAINT software has been employed for reducing the data and SADABS for correcting the intensities of absorption. Structure was solved and refined using SHELXL with anisotropic displacement parameters for non-H atoms. In the crystal structure H-atoms are located experimentally, whereas C–H atoms were fixed geometrically using the HFIX command in SHELX-TL. No missed symmetry observed in the final check of CIF file using PLATON. Information of crystallographic parameters for the structure is furnished in **Table S1**.

#### 4. References

1. J. Bergman, P.-O. Norrby, U. Tilstam and L. Venemalm, *Tetrahedron*, 1989, **45**, 5549-5564.
2. G. M. Shelke, V. K. Rao, R. K. Tiwari, B. S. Chhikara, K. Parang and A. Kumar, *RSC Adv.*, 2013, **3**, 22346-22352.
3. S. V. Nadkarni and J. M. Nagarkar, *Green Chem. Lett. Rev.*, 2011, **4**, 121-126.
4. C. Huo, C. Sun, C. Wang, X. Jia and W. Chang, *ACS Sustain. Chem. Eng.*, 2013, **1**, 549-553.
5. S. O. Lee, J. Choi, S. Kook and S. Y. Lee, *Org. Biomol. Chem.*, 2020, **18**, 9060-9064.
